# Supplementary material
Source: PubMed Central journal article supplement (PMC2535905)

**Total Synthesis of ( $\pm$ )-Phomactin B2 via an Intramolecular Cyclohexadienone  
Annulation of a Chromium Carbene Complex.**

Jie Huang, Chunrui Wu and William D. Wulff\*

Department of Chemistry, Michigan State University, East Lansing MI 48824

## Spectra of New Compounds

|                                                             |     |
|-------------------------------------------------------------|-----|
| <sup>1</sup> H NMR Spectrum of Compound <b>23</b> .         | S4  |
| <sup>13</sup> C NMR Spectrum of Compound <b>23</b> .        | S5  |
| <sup>1</sup> H NMR Spectrum of Compound <b>11</b> .         | S6  |
| <sup>13</sup> C NMR Spectrum of Compound <b>11</b> .        | S7  |
| <sup>1</sup> H NMR Spectrum of Compound <b>12</b> .         | S8  |
| <sup>13</sup> C NMR Spectrum of Compound <b>12</b> .        | S9  |
| <sup>1</sup> H NMR Spectrum of Compound <b>24</b> .         | S10 |
| <sup>13</sup> C NMR Spectrum of Compound <b>24</b> .        | S11 |
| <sup>1</sup> H NMR Spectrum of Alcohol <b>13</b> .          | S12 |
| <sup>13</sup> C NMR Spectrum of Alcohol <b>13</b> .         | S13 |
| <sup>1</sup> H NMR Spectrum of TIPS ether <b>14a</b> .      | S14 |
| <sup>13</sup> C NMR Spectrum of TIPS ether <b>14a</b> .     | S15 |
| <sup>1</sup> H NMR Spectrum of MOM ether <b>14b</b> .       | S16 |
| <sup>13</sup> C NMR Spectrum of MOM ether <b>14b</b> .      | S17 |
| <sup>1</sup> H NMR Spectrum of Carbene Complex <b>3a</b> .  | S18 |
| <sup>13</sup> C NMR Spectrum of Carbene Complex <b>3a</b> . | S19 |
| <sup>1</sup> H NMR Spectrum of Carbene Complex <b>3b</b> .  | S20 |
| <sup>13</sup> C NMR Spectrum of Carbene Complex <b>3b</b> . | S21 |
| <sup>1</sup> H NMR Spectrum of Dienone <b>2a</b> .          | S22 |
| <sup>13</sup> C NMR Spectrum of Dienone <b>2a</b> .         | S23 |
| <sup>1</sup> H NMR Spectrum of Dienone <b>2b</b> .          | S24 |
| <sup>13</sup> C NMR Spectrum of Dienone <b>2b</b> .         | S25 |
| <sup>1</sup> H NMR Spectrum of Dienone <b>15a</b> .         | S26 |
| <sup>13</sup> C NMR Spectrum of Dienone <b>15a</b> .        | S27 |
| <sup>1</sup> H NMR Spectrum of Dienone <b>15b</b> .         | S28 |
| <sup>13</sup> C NMR Spectrum of Dienone <b>15b</b> .        | S29 |
| <sup>1</sup> H NMR Spectrum of Dienone <b>2c</b> .          | S30 |
| <sup>13</sup> C NMR Spectrum of Dienone <b>2c</b> .         | S31 |
| <sup>1</sup> H NMR Spectrum of Dienone <b>16</b> .          | S32 |
| <sup>13</sup> C NMR Spectrum of Dienone <b>16</b> .         | S33 |
| <sup>1</sup> H NMR Spectrum of Dienone <b>25</b> .          | S34 |
| <sup>13</sup> C NMR Spectrum of Dienone <b>25</b> .         | S35 |
| <sup>1</sup> H NMR Spectrum of Keto Alcohol <b>26</b> .     | S36 |
| <sup>13</sup> C NMR Spectrum of Keto Alcohol <b>26</b> .    | S37 |

|                                                                              |     |
|------------------------------------------------------------------------------|-----|
| <sup>1</sup> H NMR Spectrum of TIPS ether <b>27</b> .                        | S38 |
| <sup>13</sup> C NMR Spectrum of TIPS ether <b>27</b> .                       | S39 |
| <sup>1</sup> H NMR Spectrum of Allylic Alcohol <b>18</b> .                   | S40 |
| <sup>13</sup> C NMR Spectrum of Allylic Alcohol <b>18</b> .                  | S41 |
| <sup>1</sup> H NMR Spectrum of Allylic Alcohol <b>19</b> .                   | S42 |
| <sup>13</sup> C NMR Spectrum of Allylic Alcohol <b>19</b> .                  | S43 |
| <sup>1</sup> H NMR Spectrum of Epoxy Alcohol <b>21</b> .                     | S44 |
| <sup>13</sup> C NMR Spectrum of Epoxy Alcohol <b>21</b> .                    | S45 |
| <sup>1</sup> H NMR Spectrum of Epoxy Alcohol <b>20</b> .                     | S46 |
| <sup>13</sup> C NMR Spectrum of Epoxy Alcohol <b>20</b> .                    | S47 |
| <sup>1</sup> H NMR Spectrum of Epoxy Ketone <b>29</b> .                      | S48 |
| <sup>13</sup> C NMR Spectrum of Epoxy Ketone <b>29</b> .                     | S49 |
| <sup>1</sup> H NMR Spectrum of Epoxy Ketone <b>22</b>                        | S50 |
| <sup>13</sup> C NMR Spectrum of Epoxy Ketone <b>22</b>                       | S51 |
| <sup>1</sup> H NMR Spectrum of Epoxy Ketone <b>22</b> in CD <sub>3</sub> OD  | S52 |
| <sup>13</sup> C NMR Spectrum of Epoxy Ketone <b>22</b> in CD <sub>3</sub> OD | S53 |
| <sup>1</sup> H NMR Spectrum of Acetate <b>30</b> .                           | S54 |
| <sup>13</sup> C NMR Spectrum of Acetate <b>30</b> .                          | S55 |
| <sup>1</sup> H NMR Spectrum of Acetate <b>30</b> in CD <sub>3</sub> OD       | S56 |
| <sup>13</sup> C NMR Spectrum of Acetate <b>30</b> in CD <sub>3</sub> OD      | S57 |
| <sup>1</sup> H NMR Spectrum of Phomactin B2.                                 | S58 |
| <sup>13</sup> C NMR Spectrum of Phomactin B2.                                | S59 |
| <sup>1</sup> H NMR Spectrum of Phomactin B2 in CD <sub>3</sub> OD            | S60 |
| <sup>13</sup> C NMR Spectrum of Phomactin B2 in CD <sub>3</sub> OD           | S61 |
| <sup>1</sup> H NMR Spectrum of p-Nitrobenzoate <b>31</b> .                   | S62 |
| <sup>13</sup> C NMR Spectrum of p-Nitrobenzoate <b>31</b> .                  | S63 |

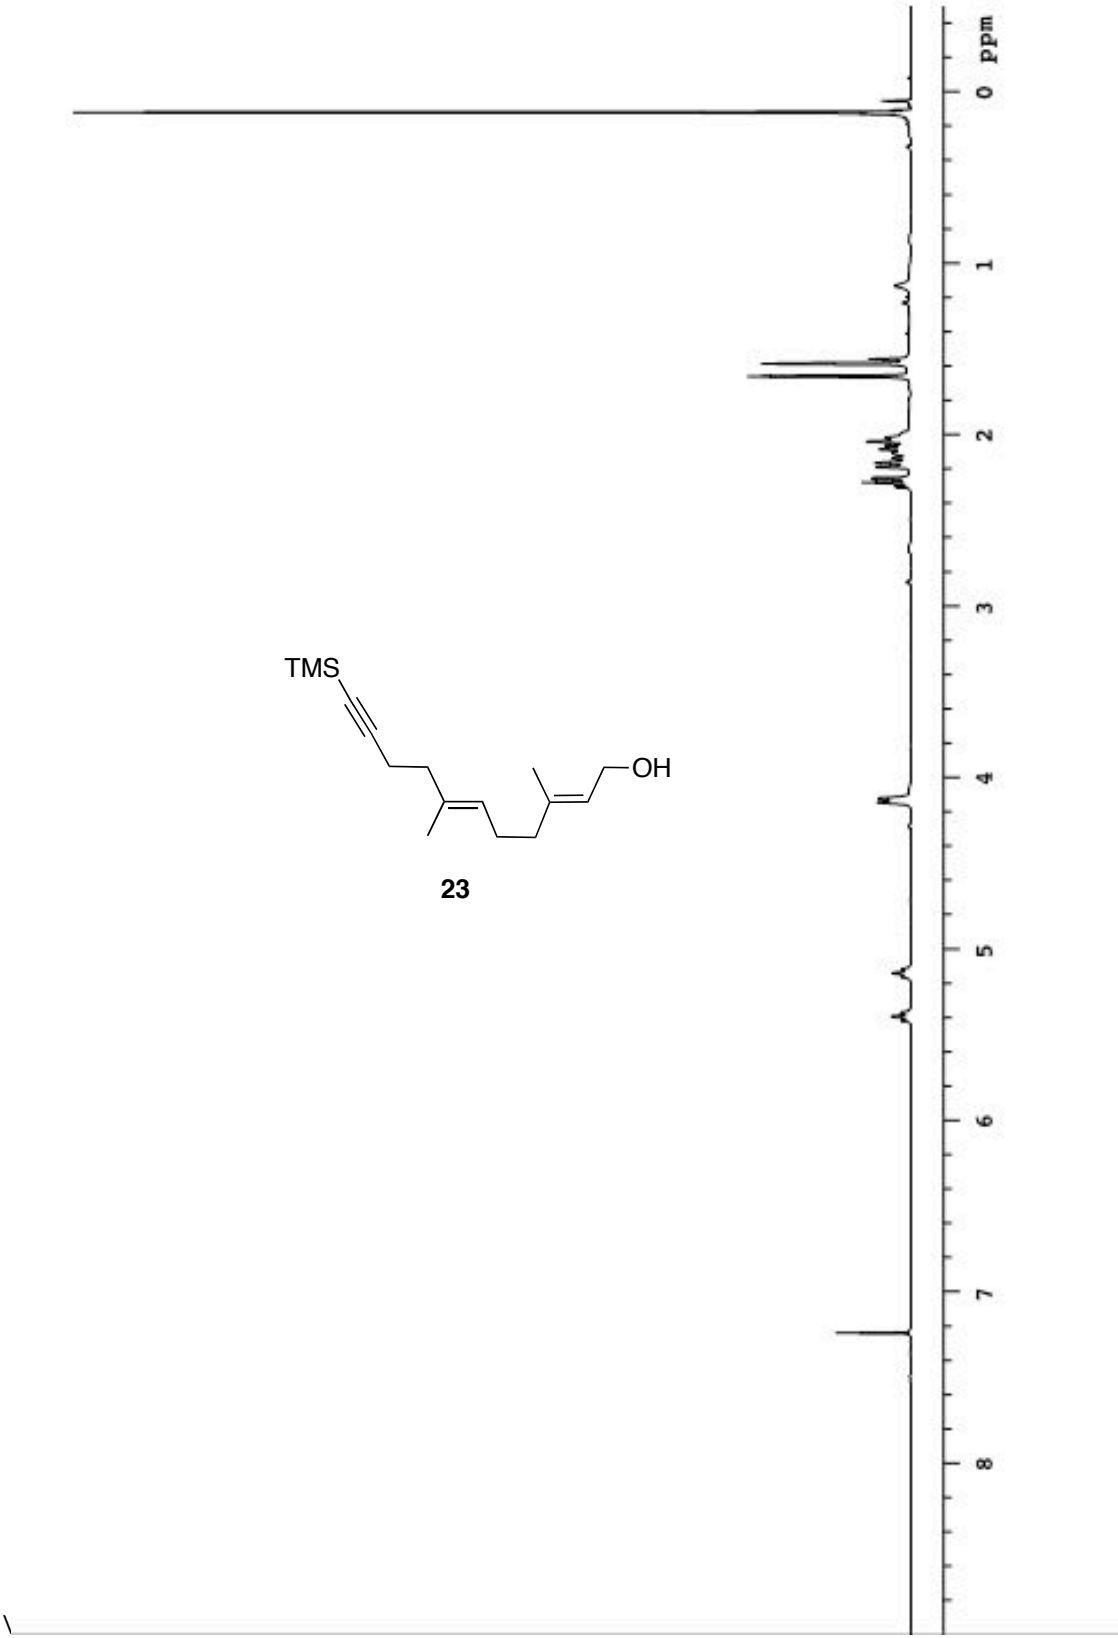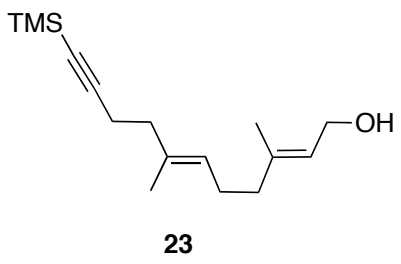

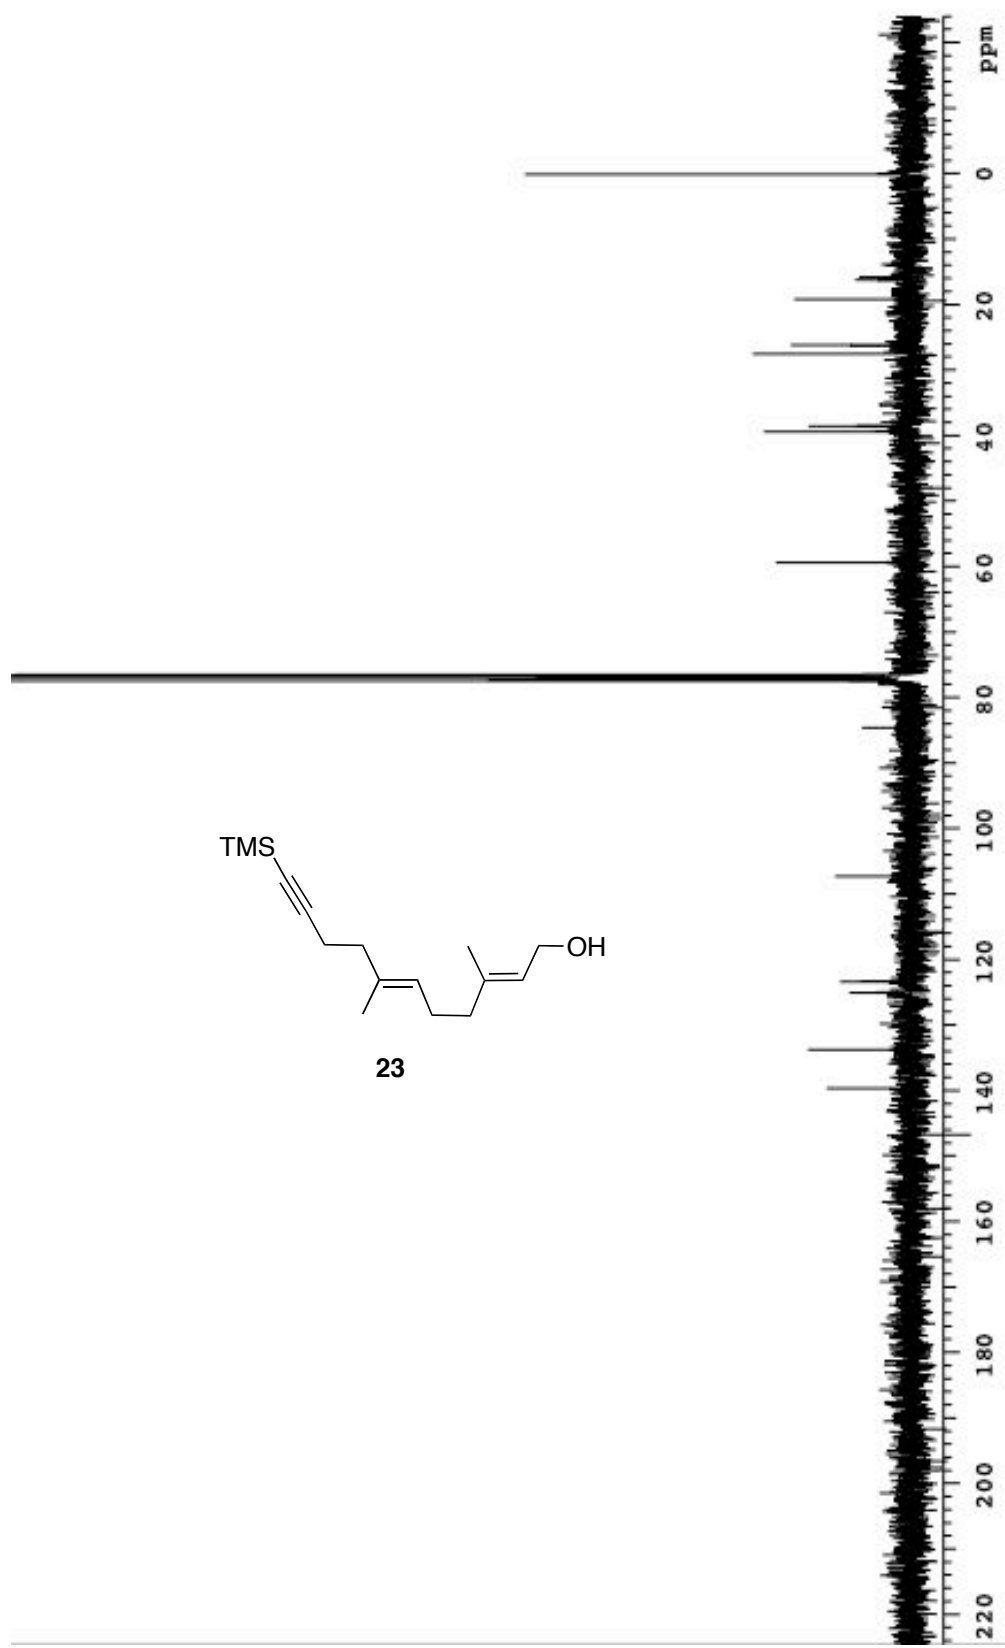

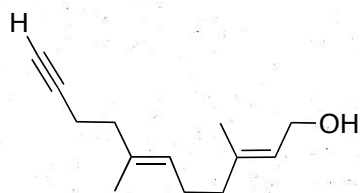

11

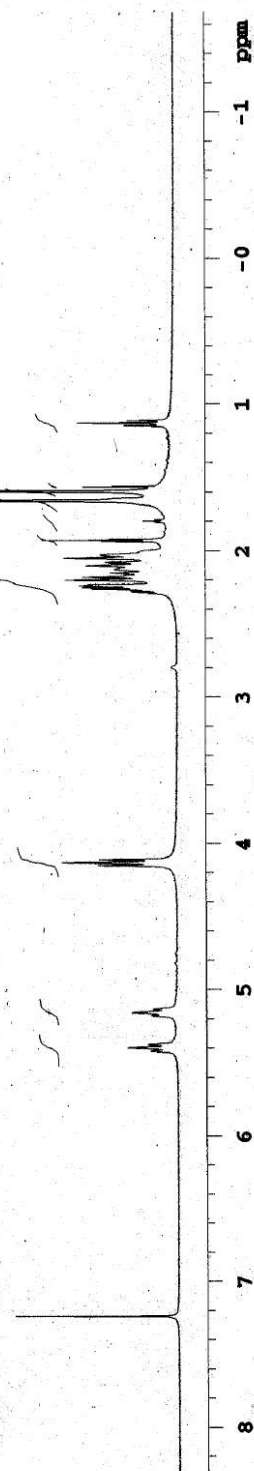

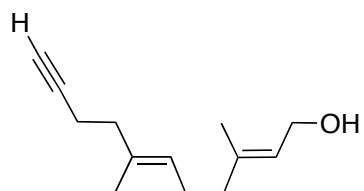

11

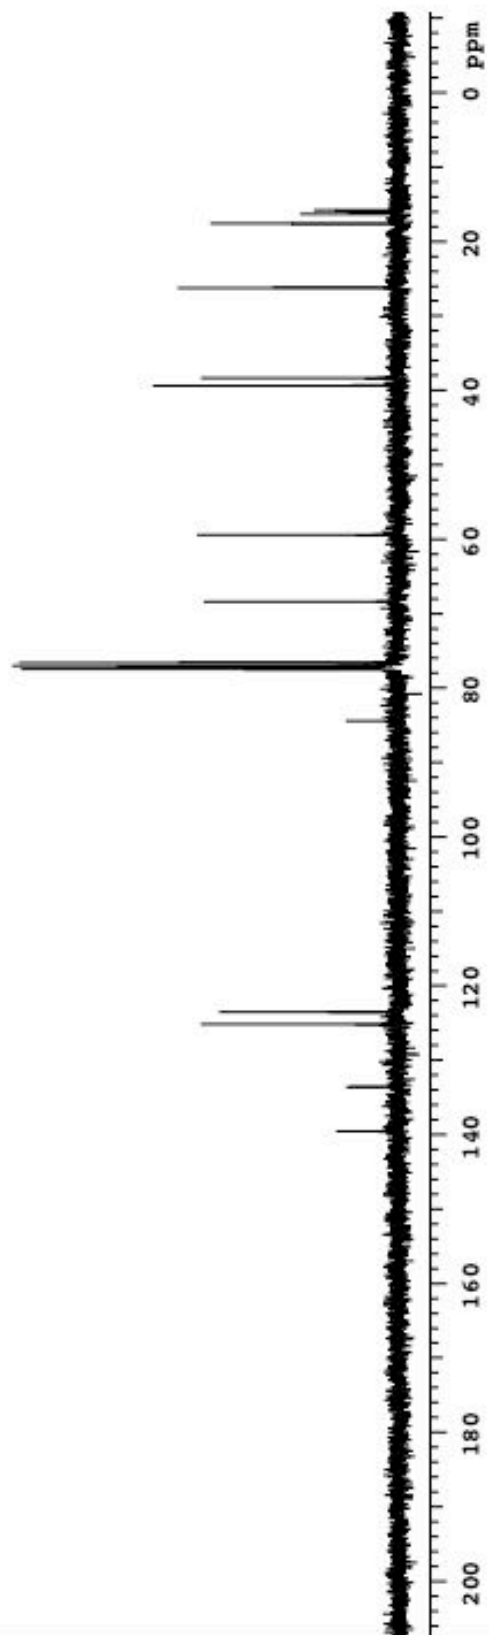

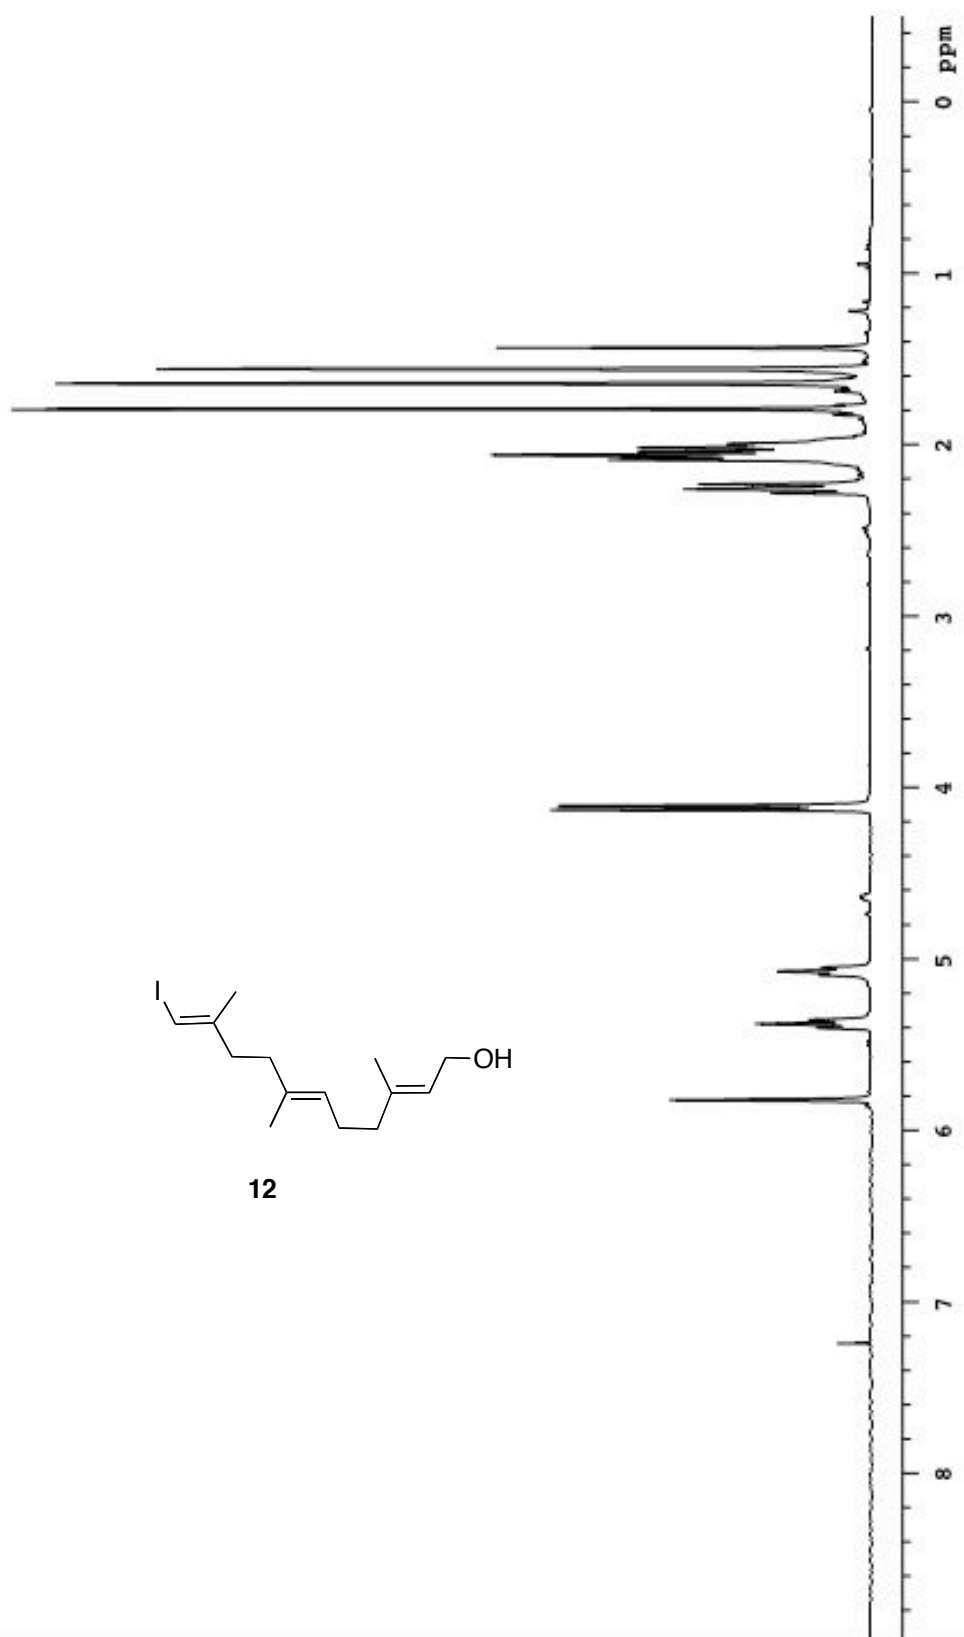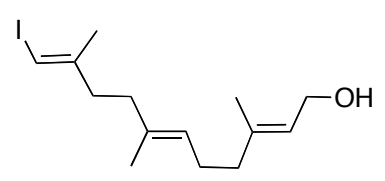

12



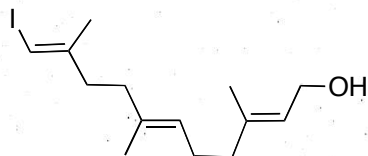

12

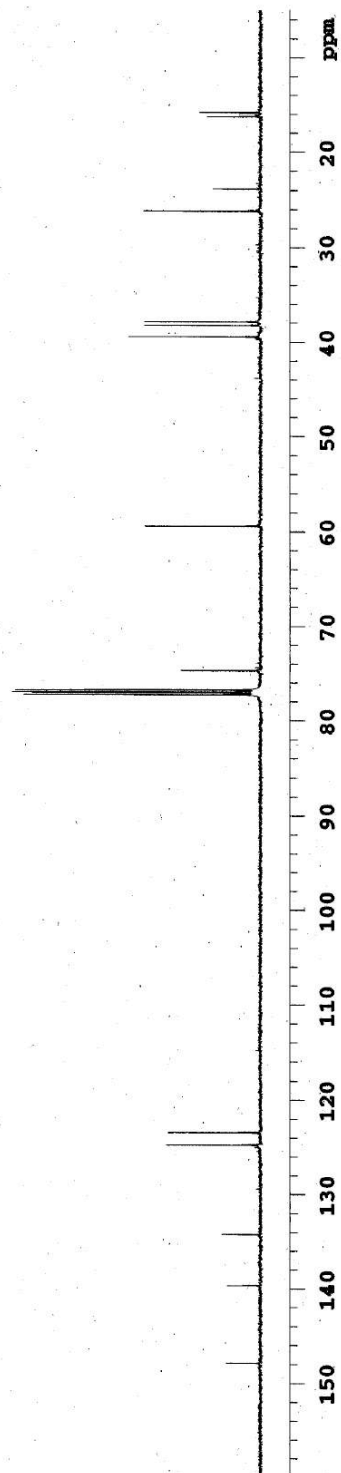

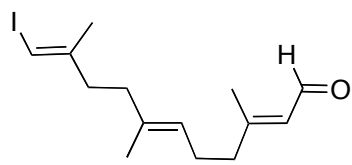

24

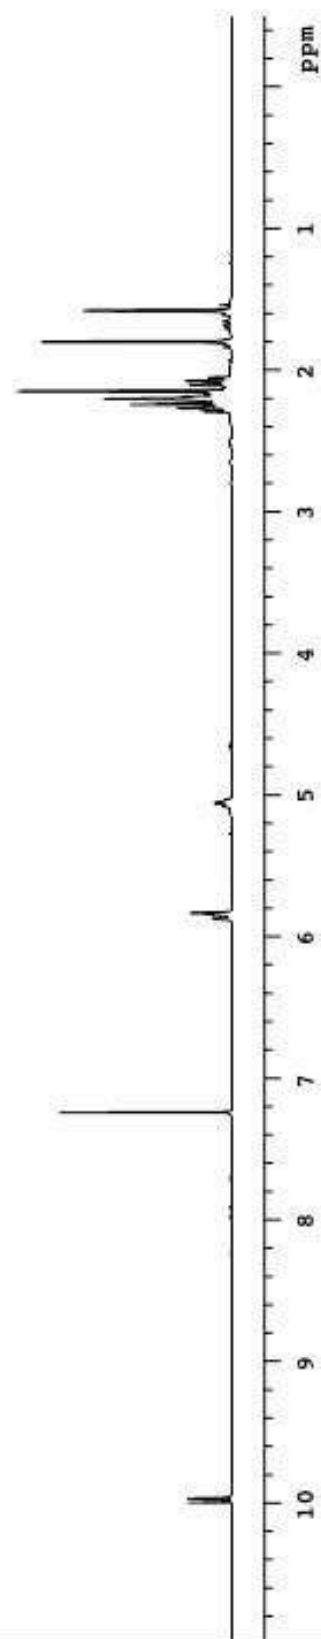

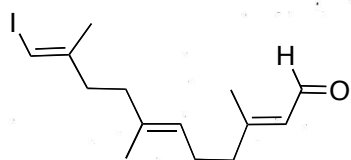

24

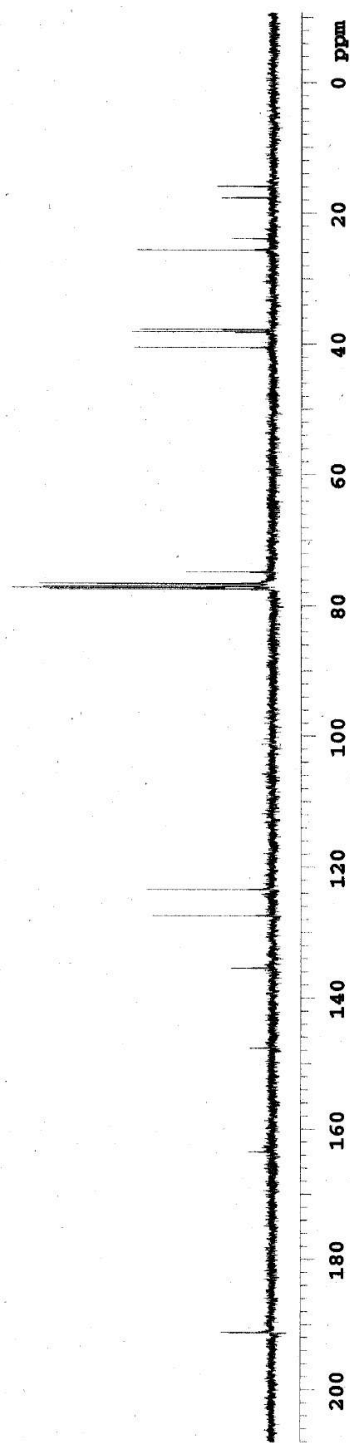

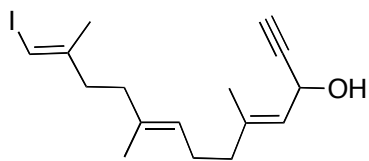

13

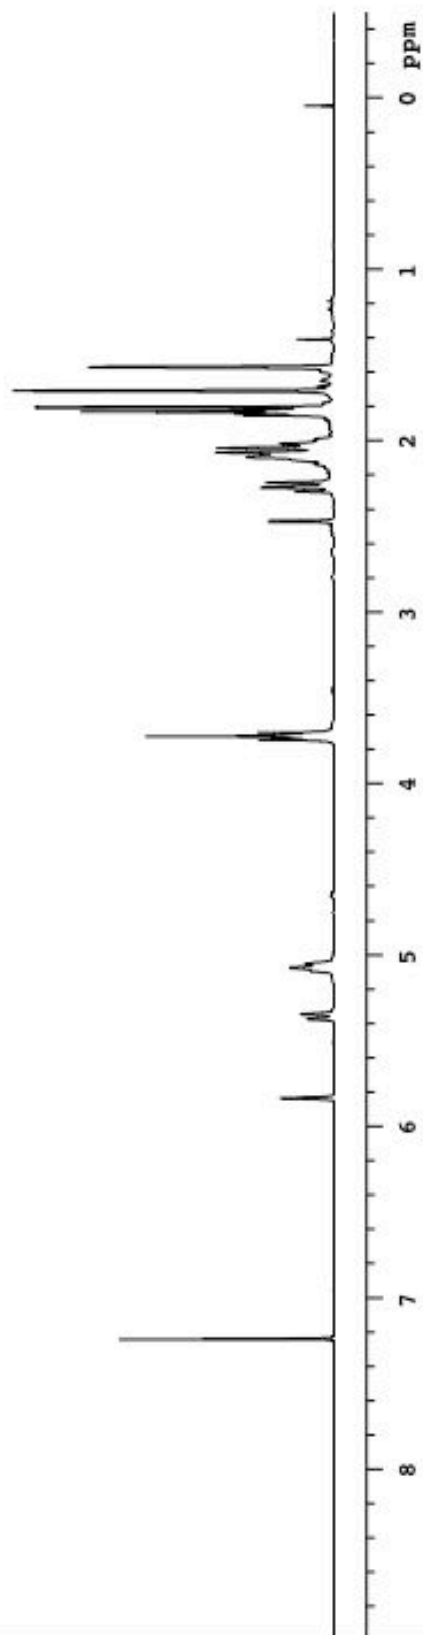

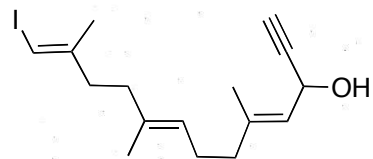

13

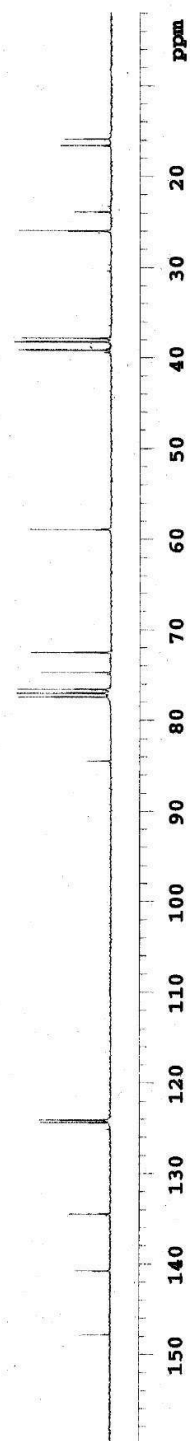

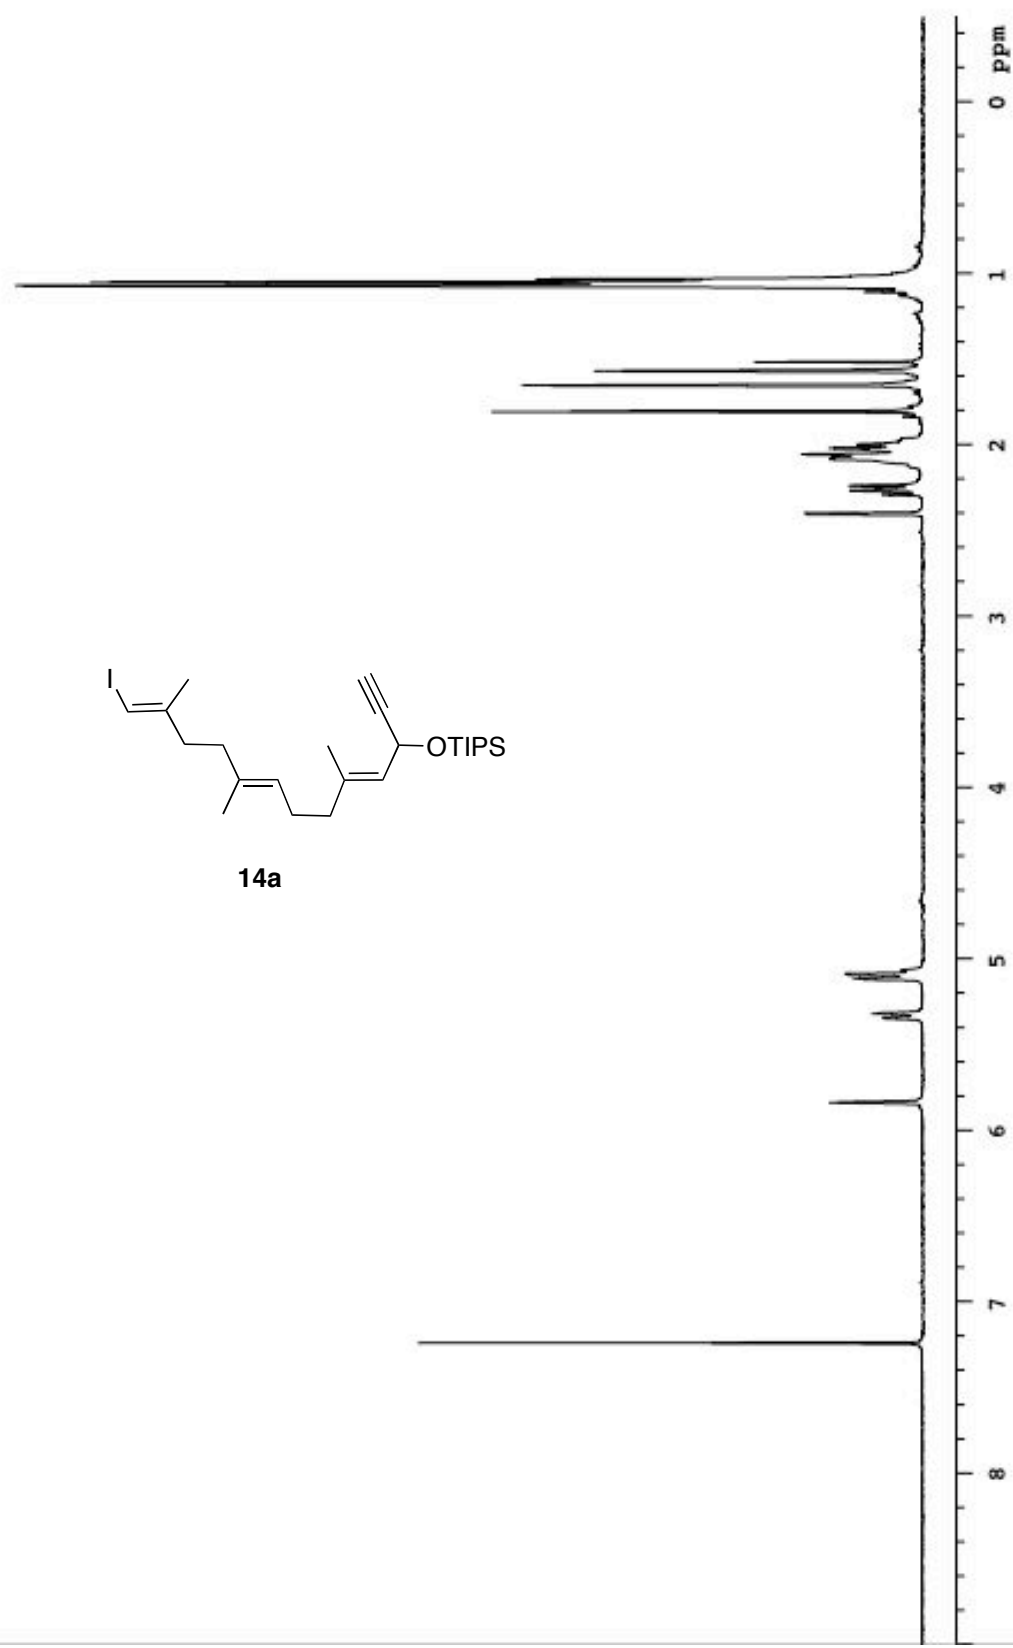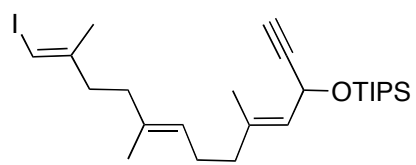

14a



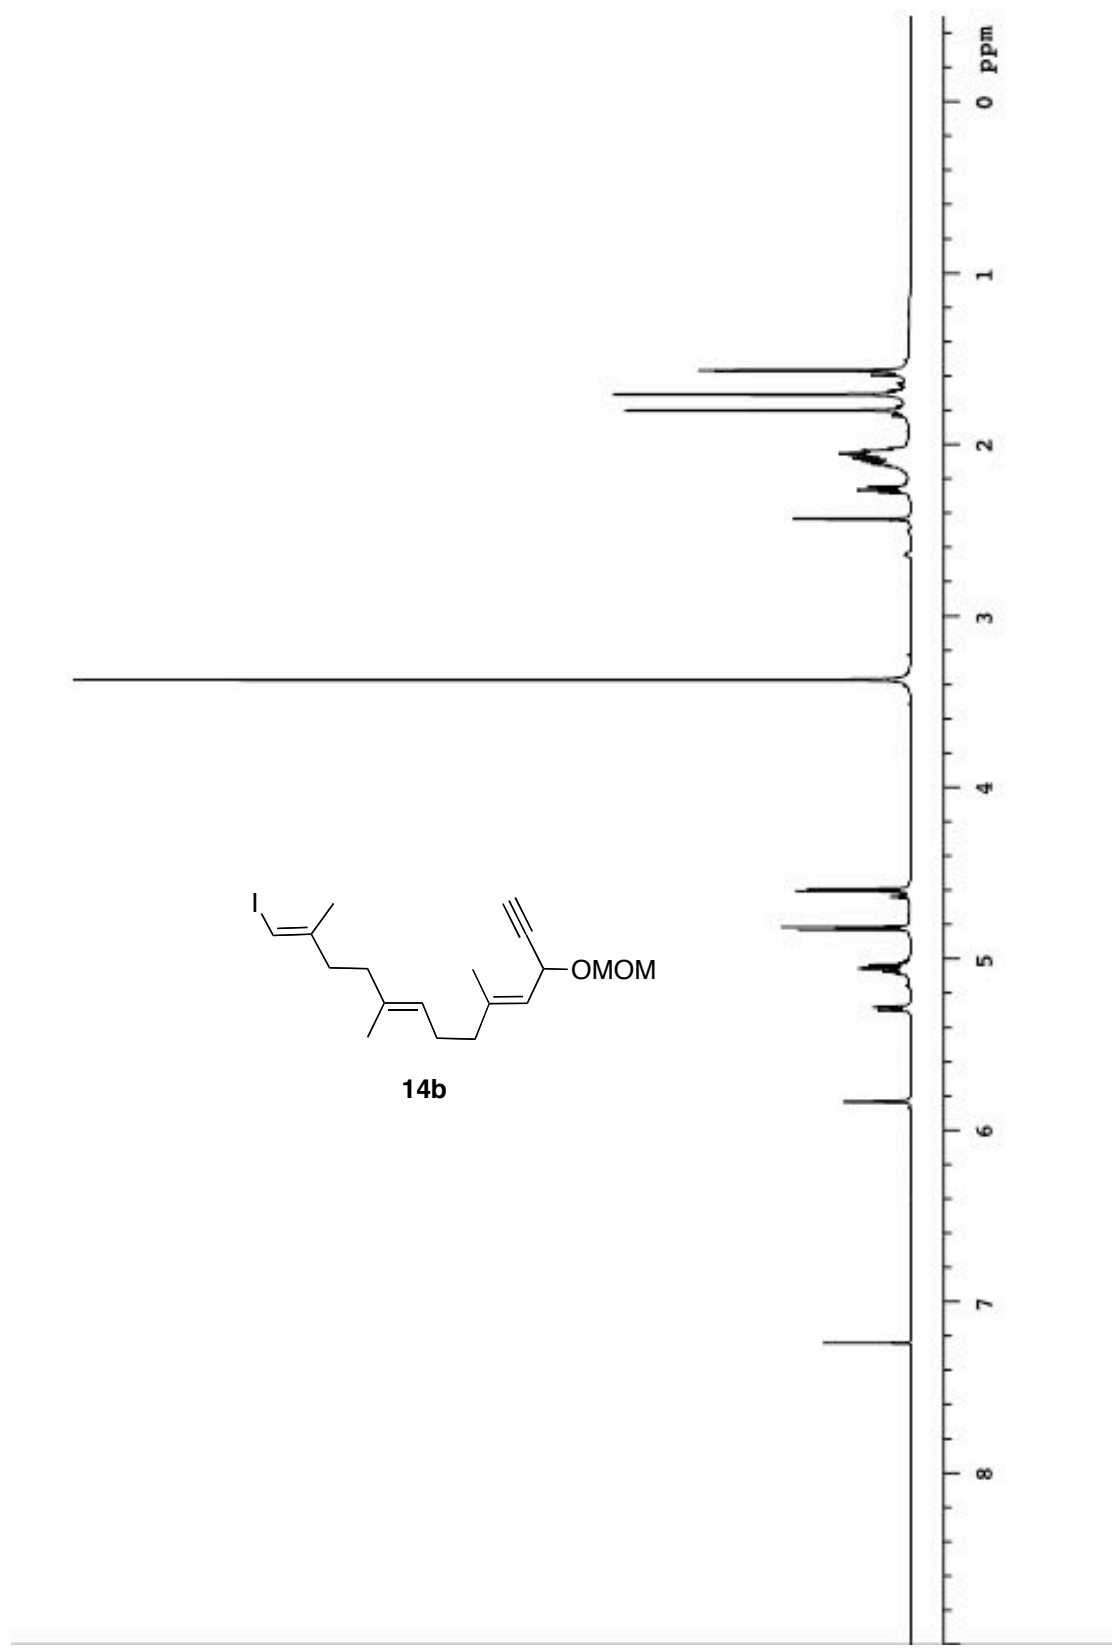



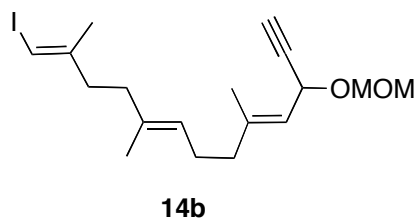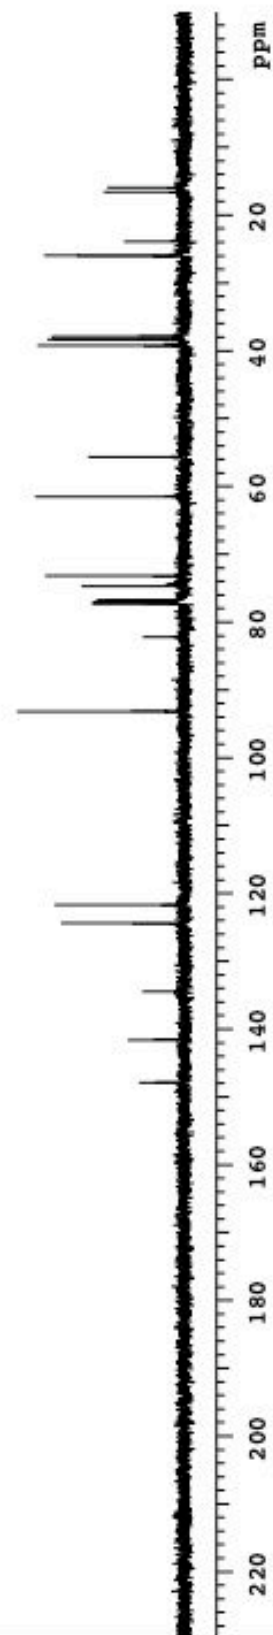



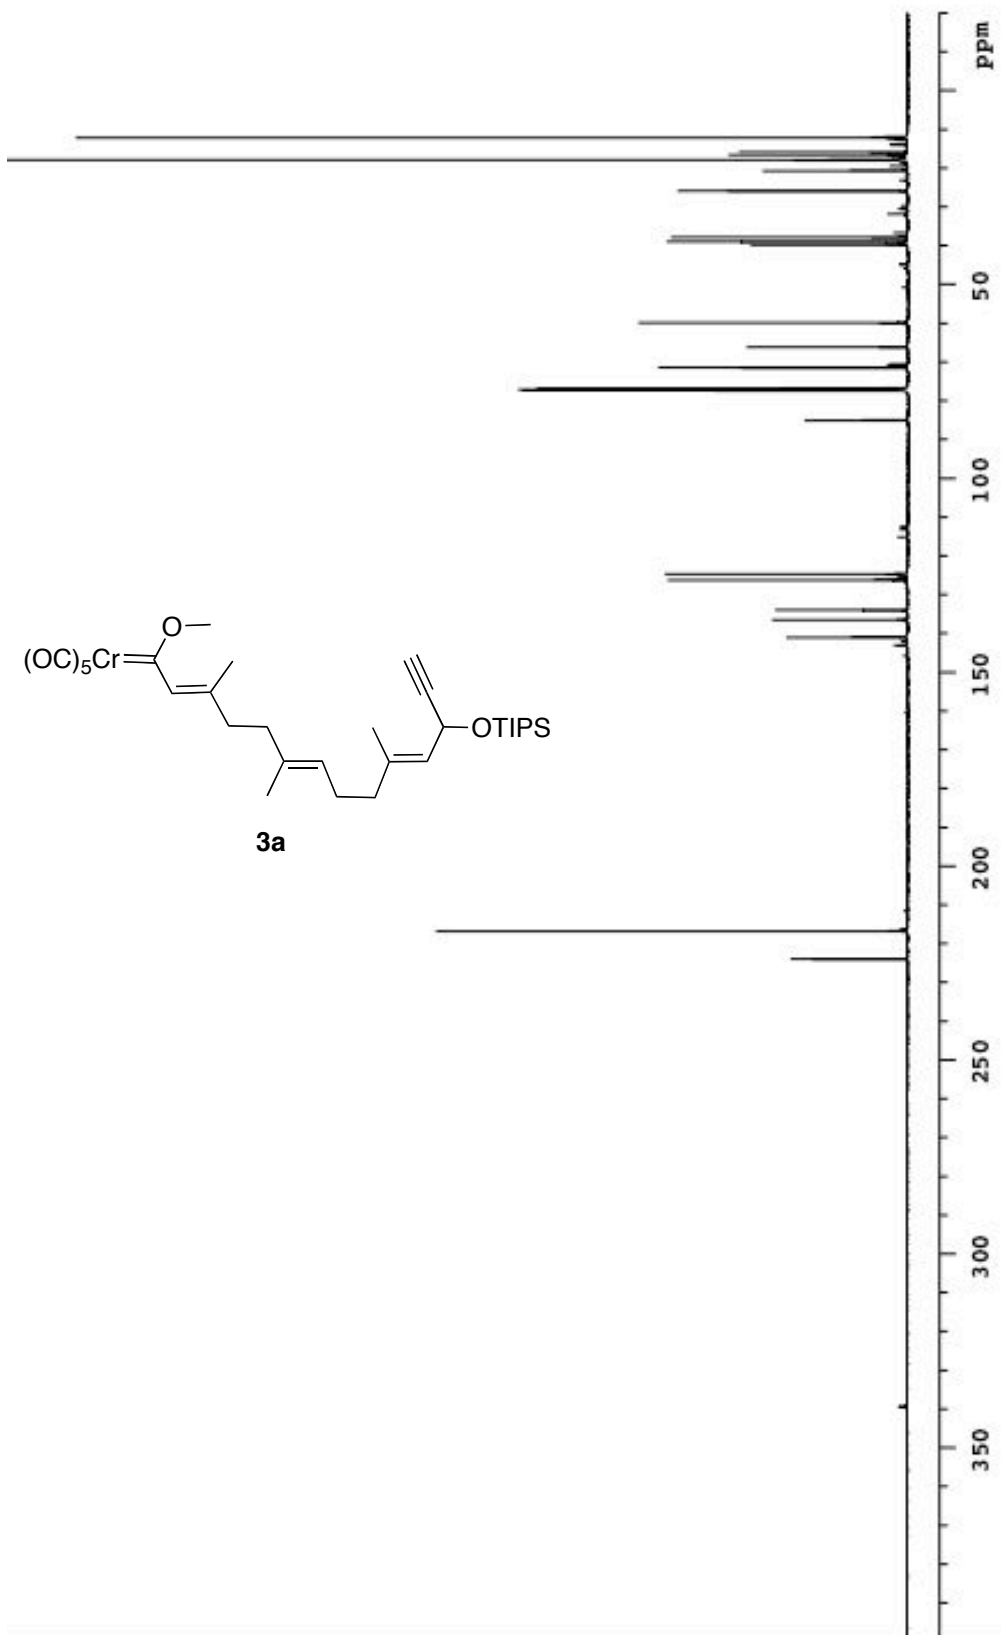



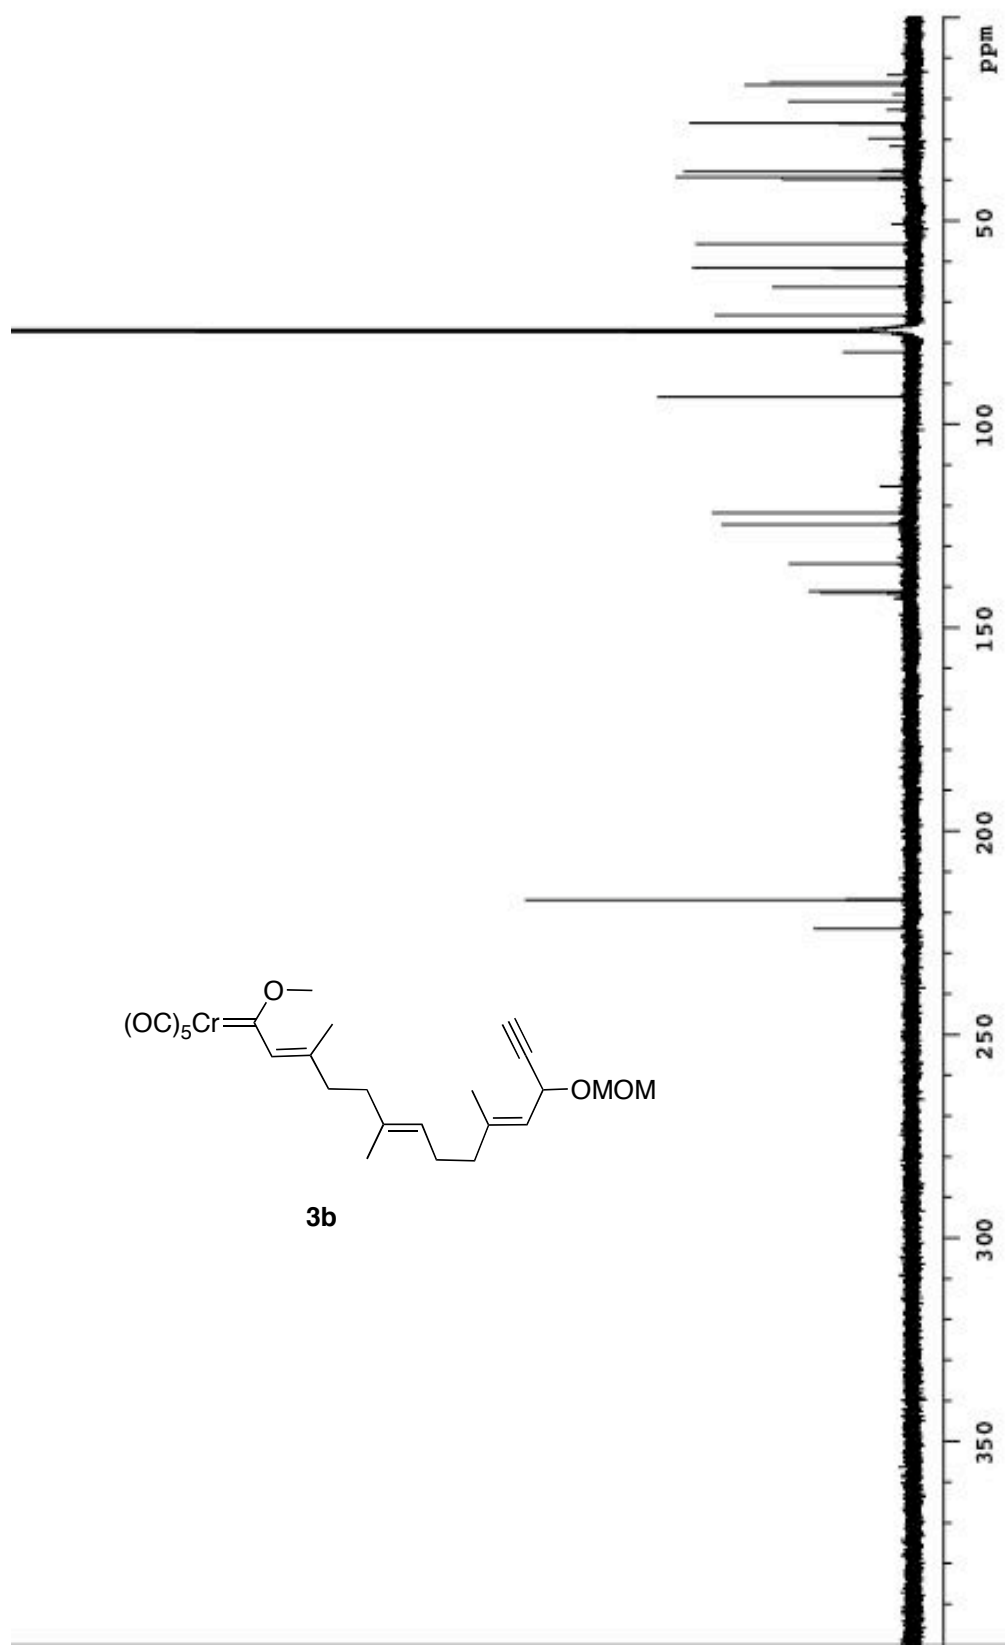

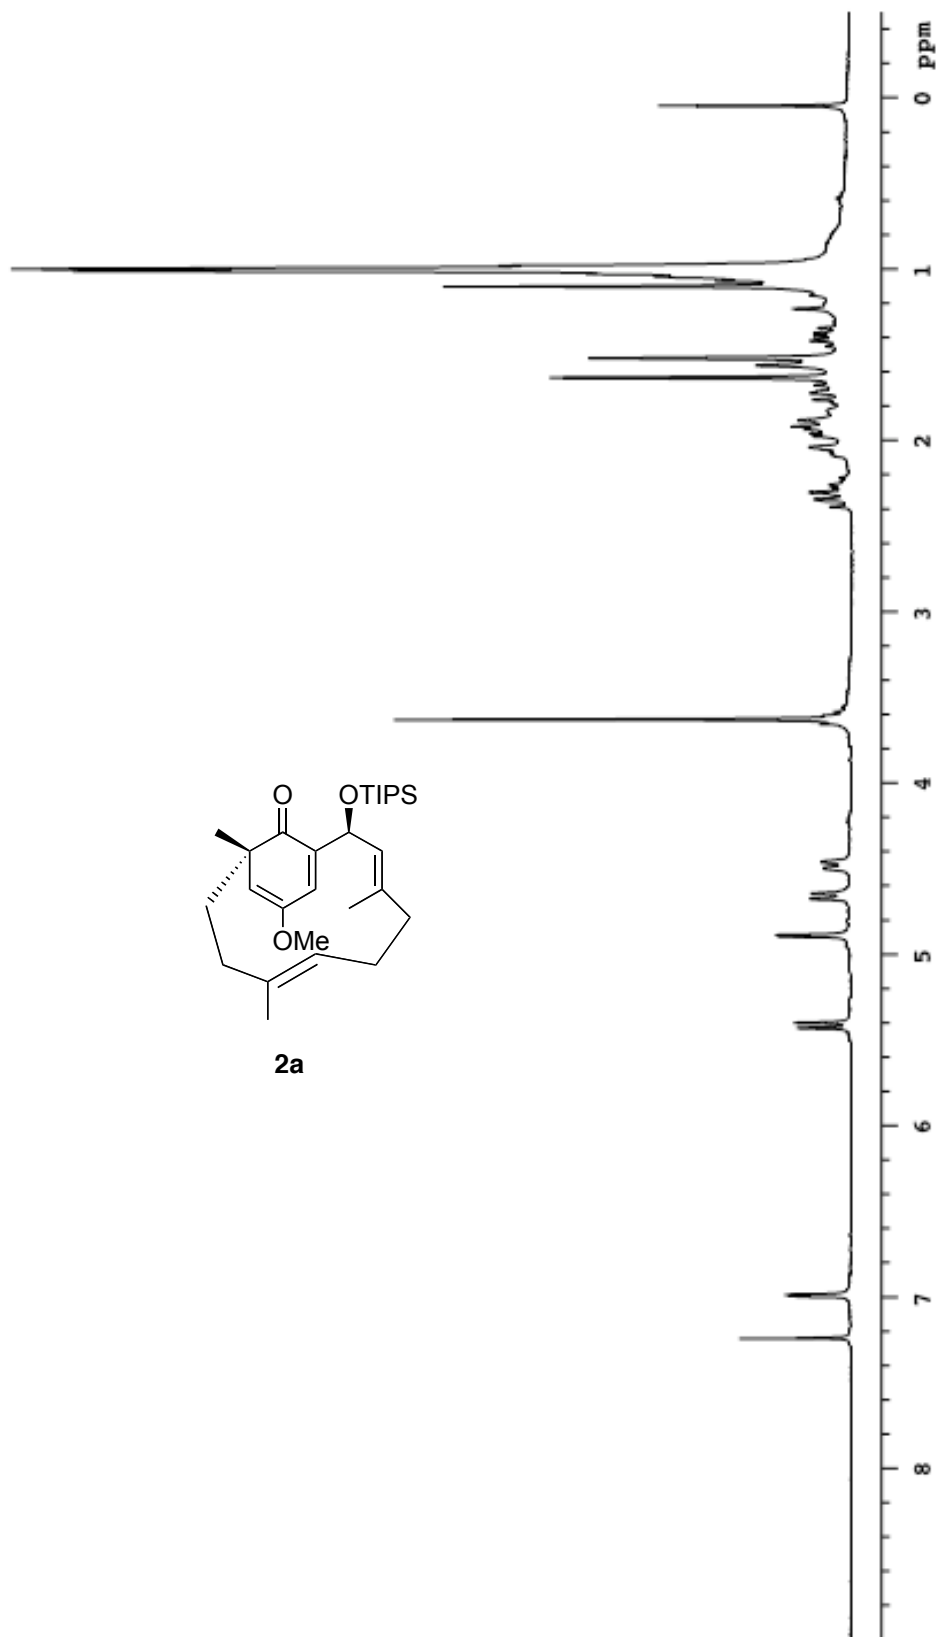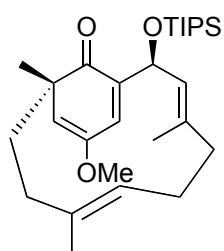

2a

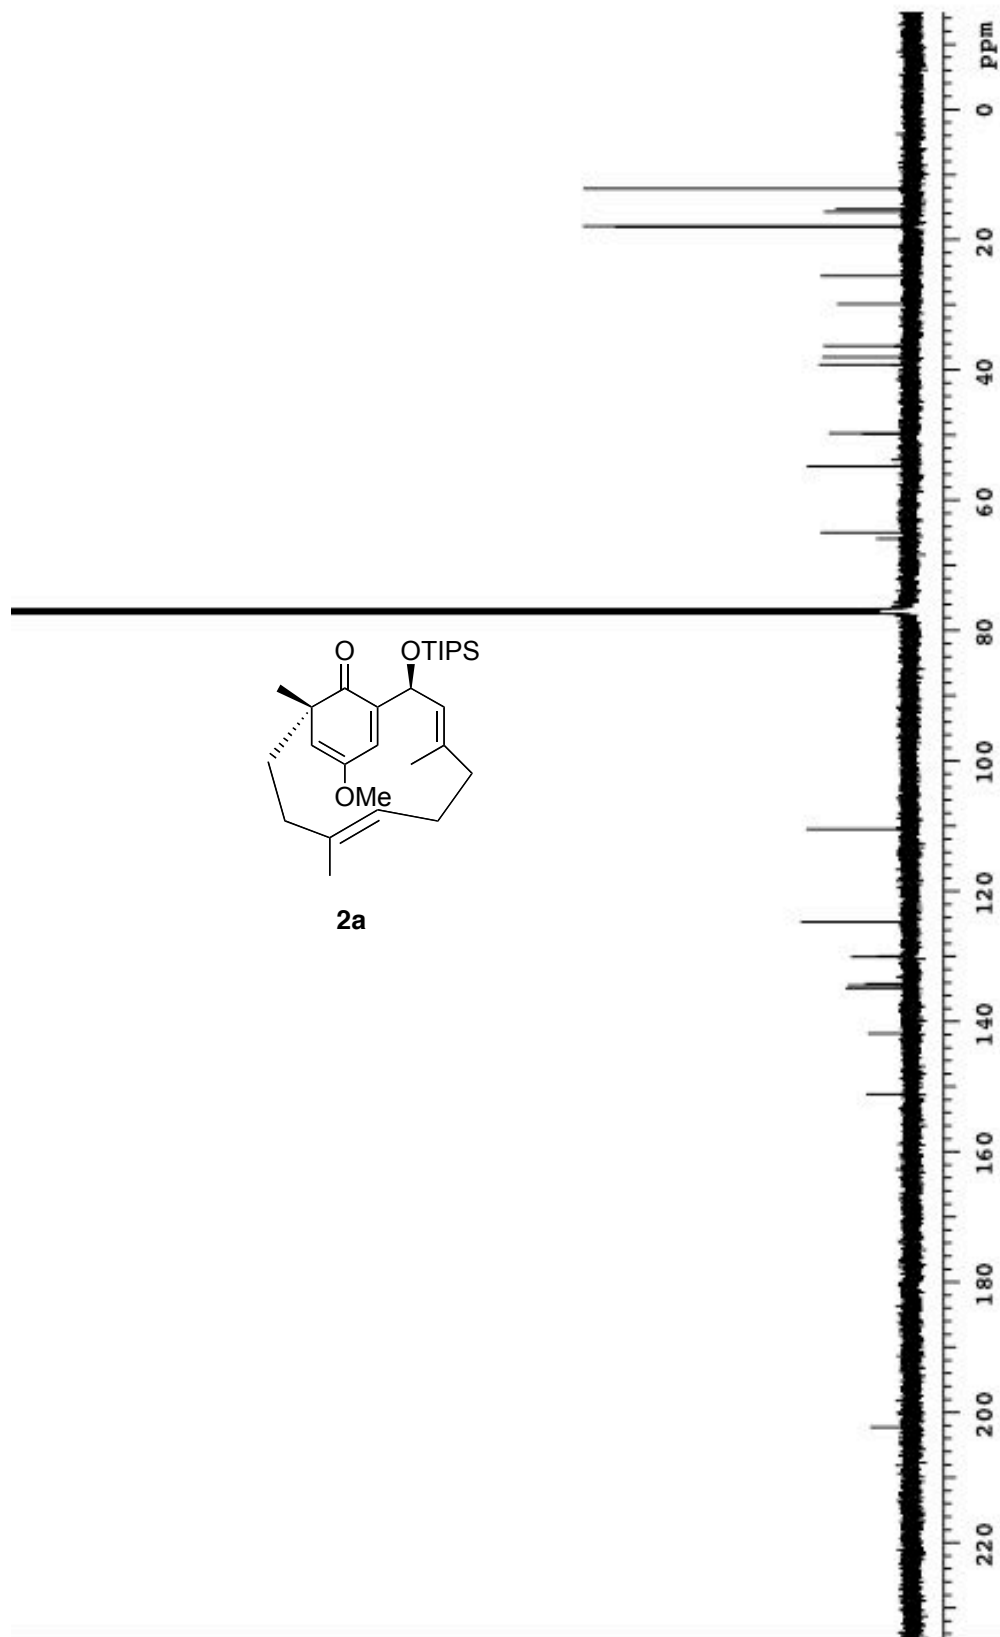

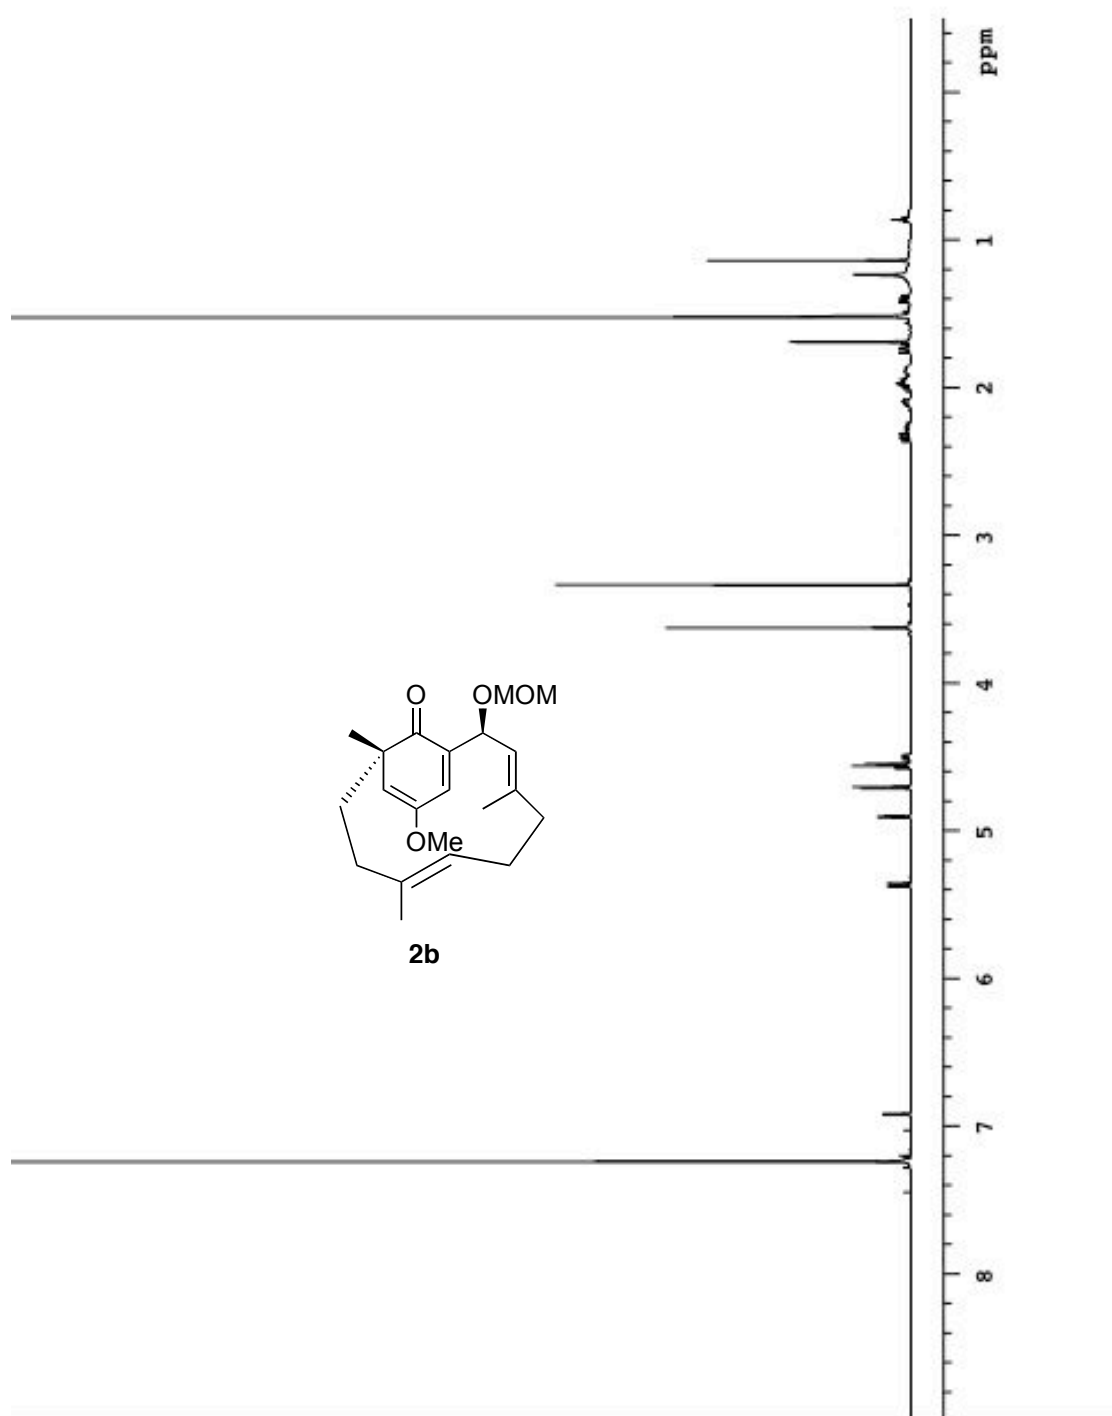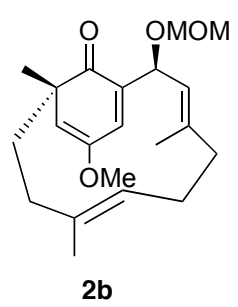



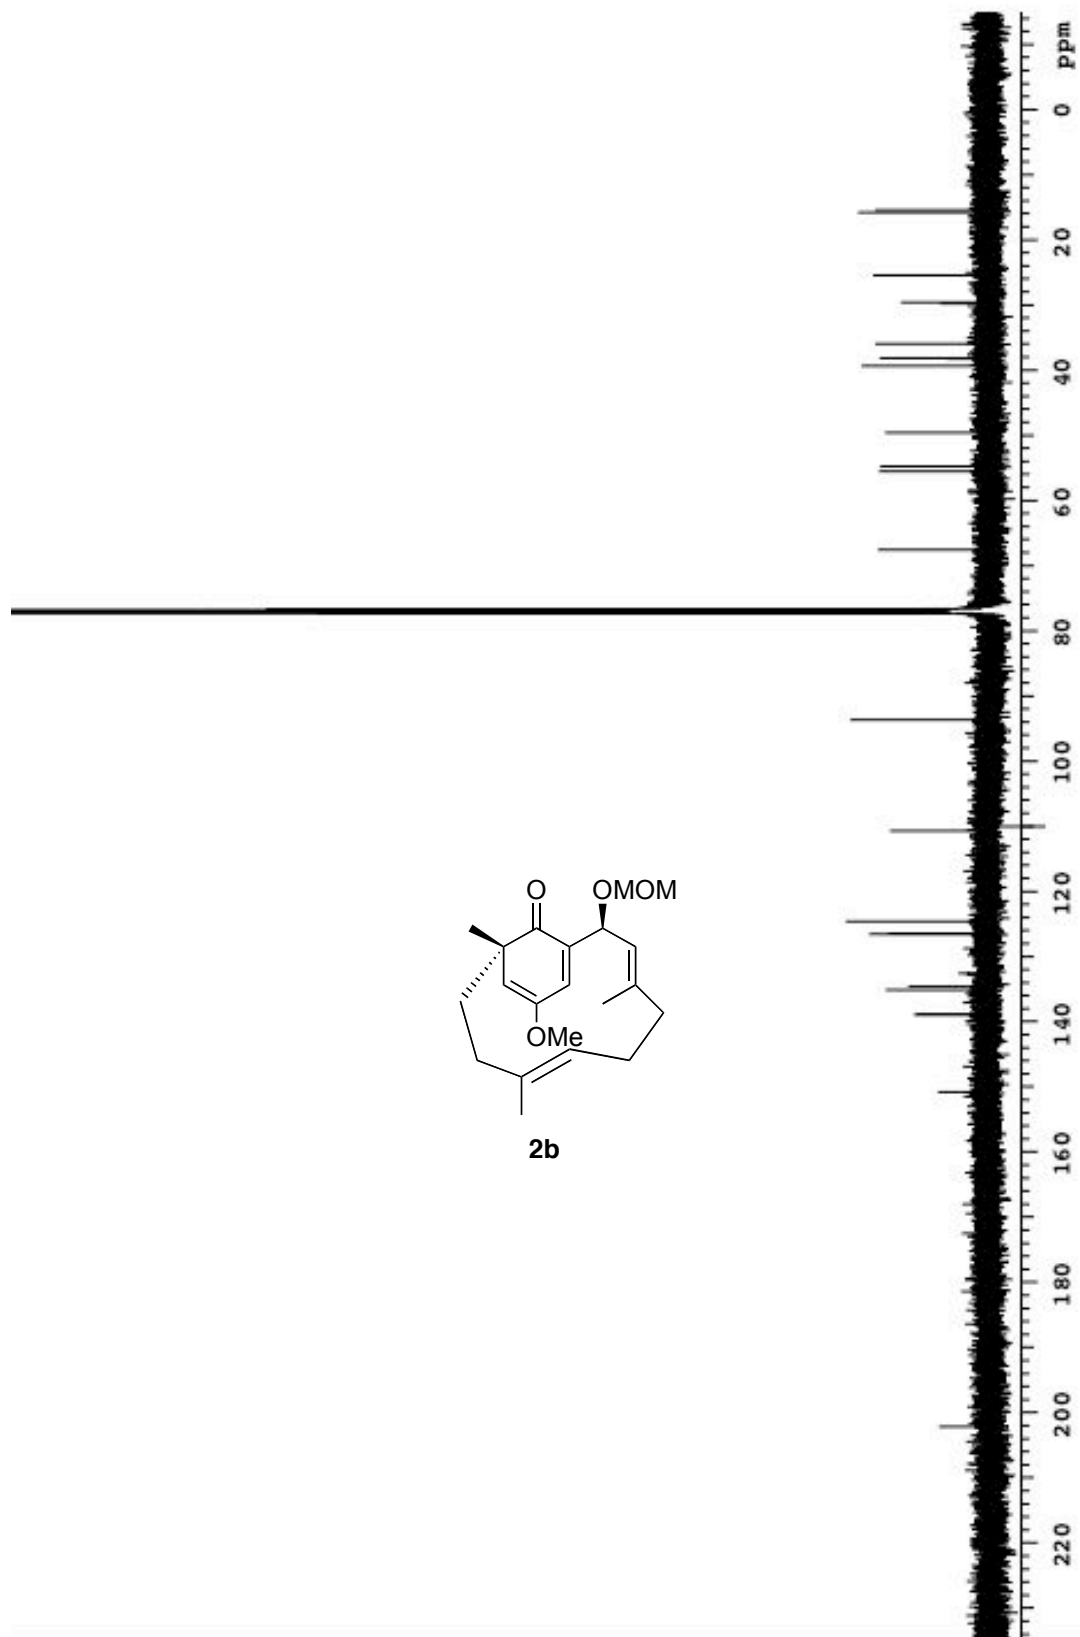

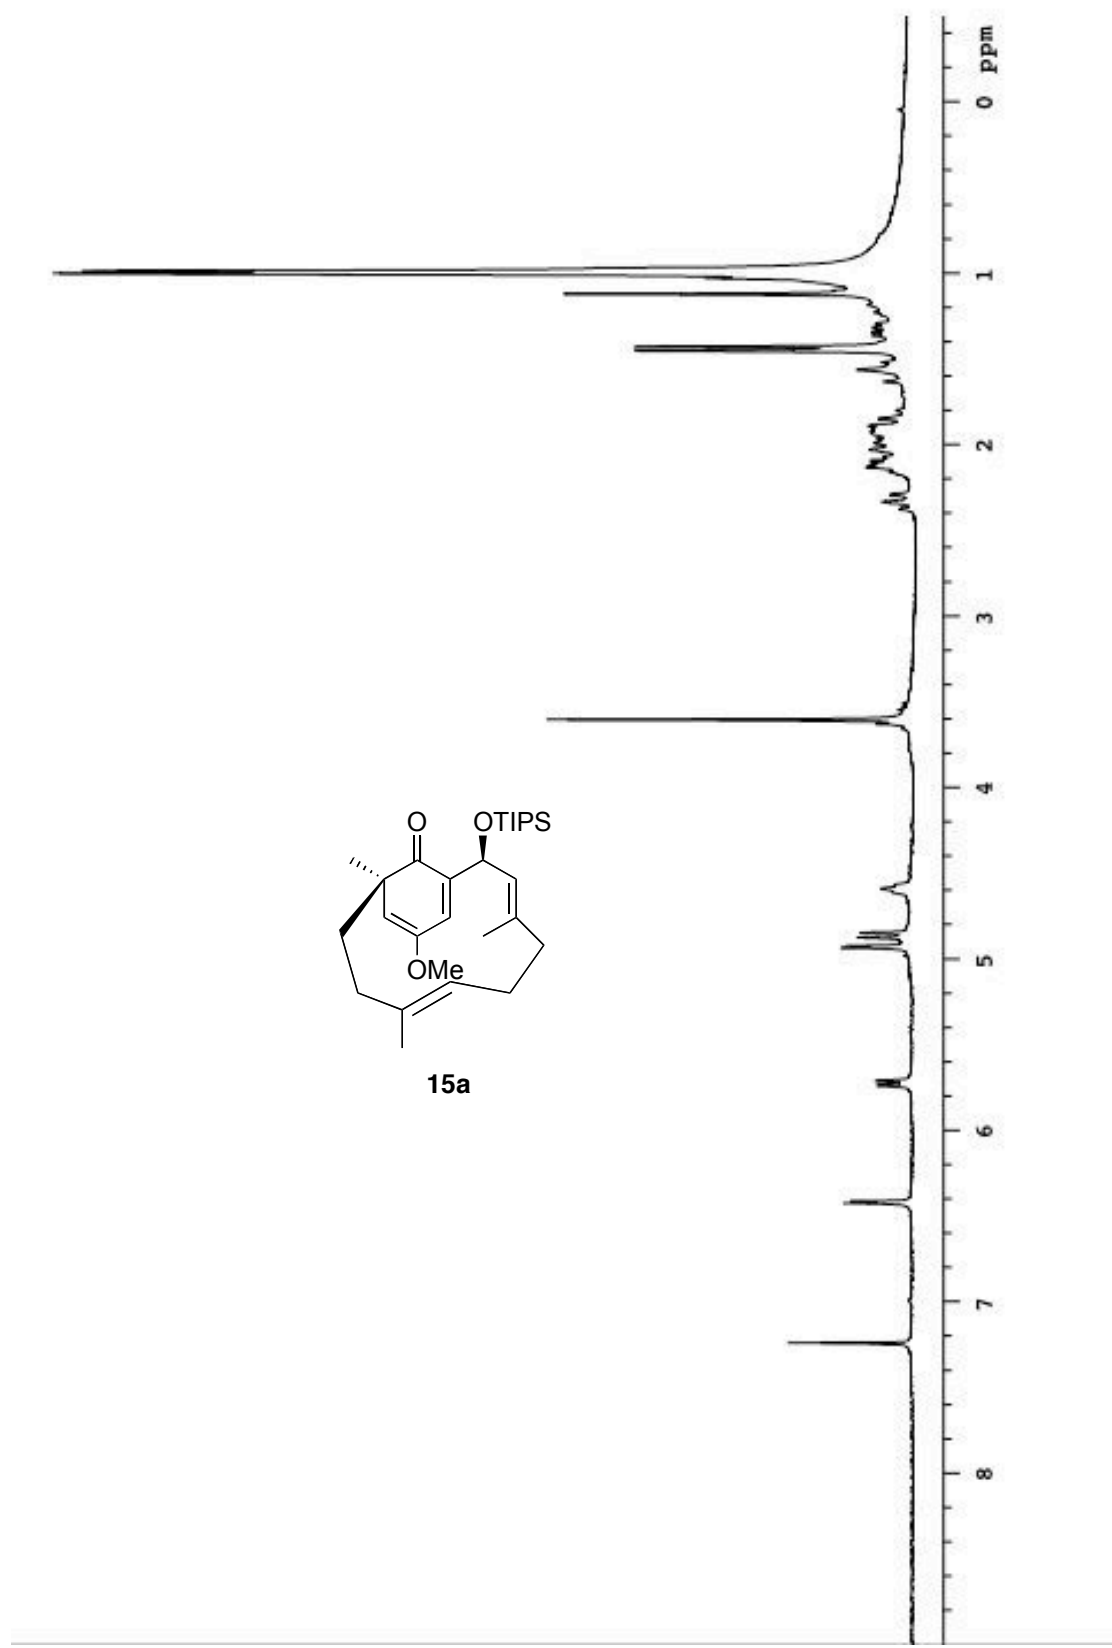

15a

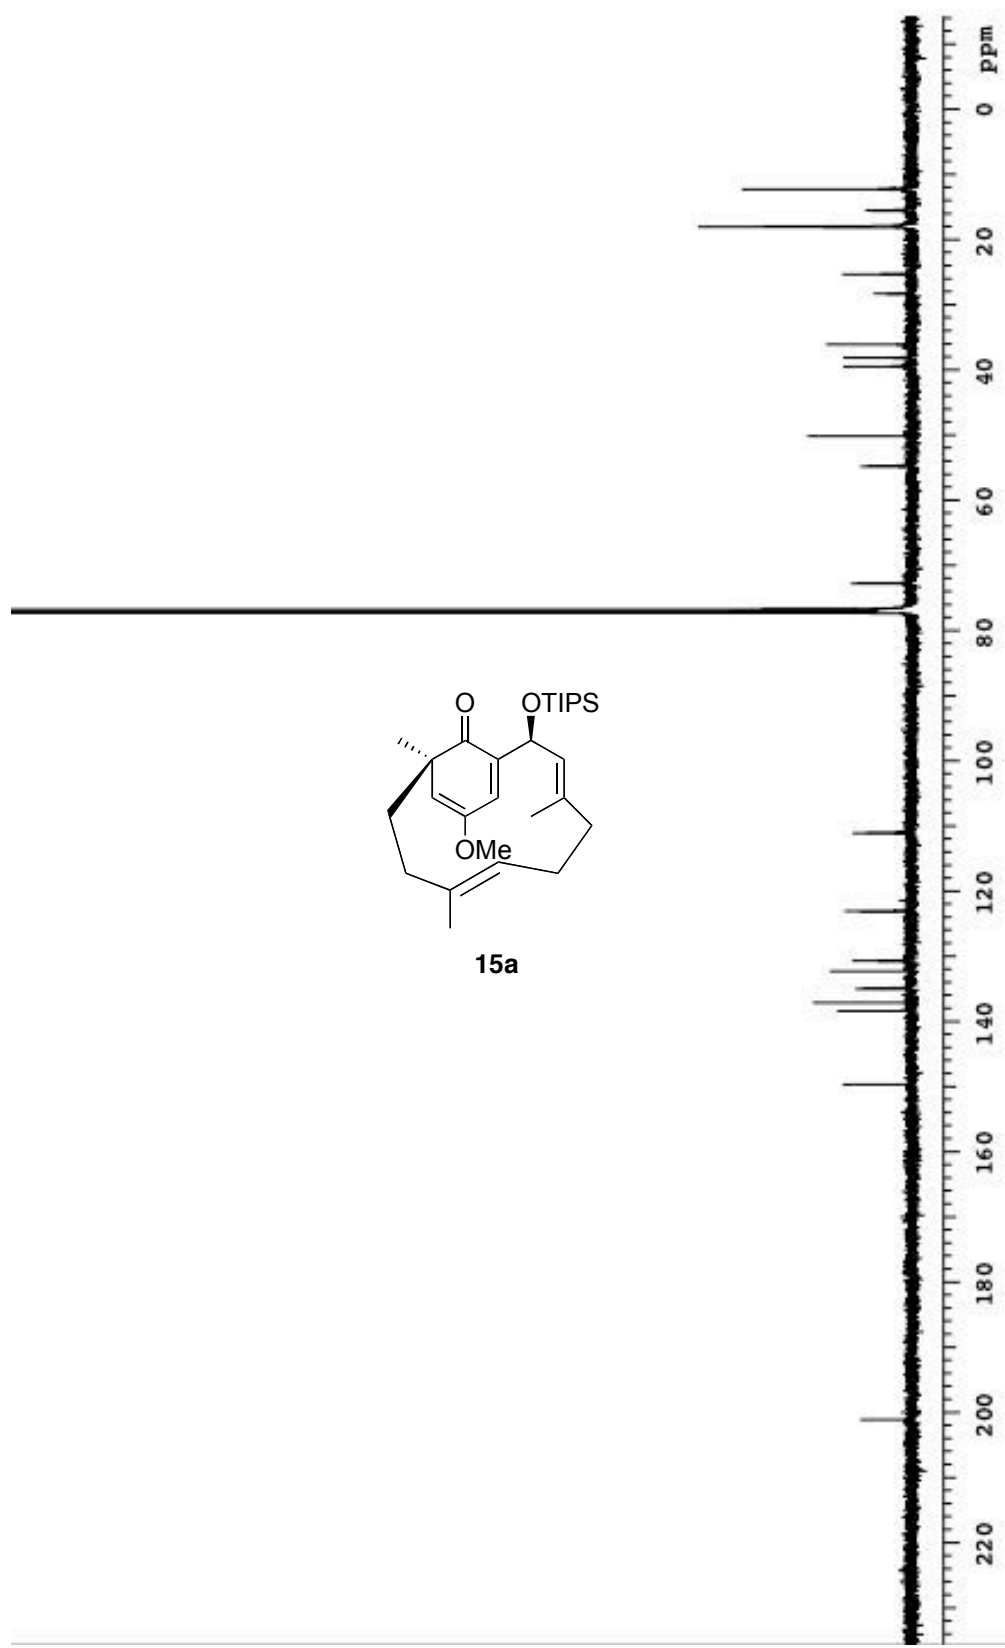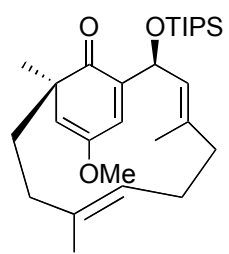

15a

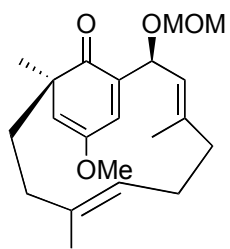

15b

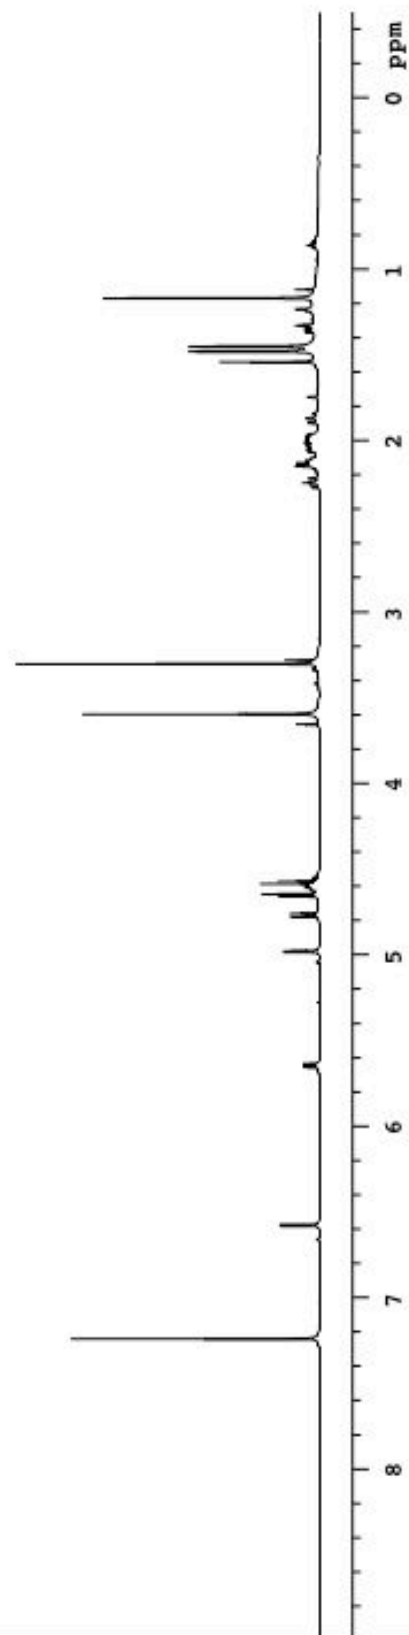

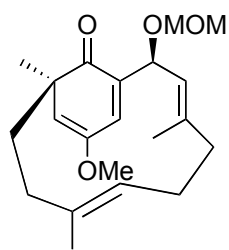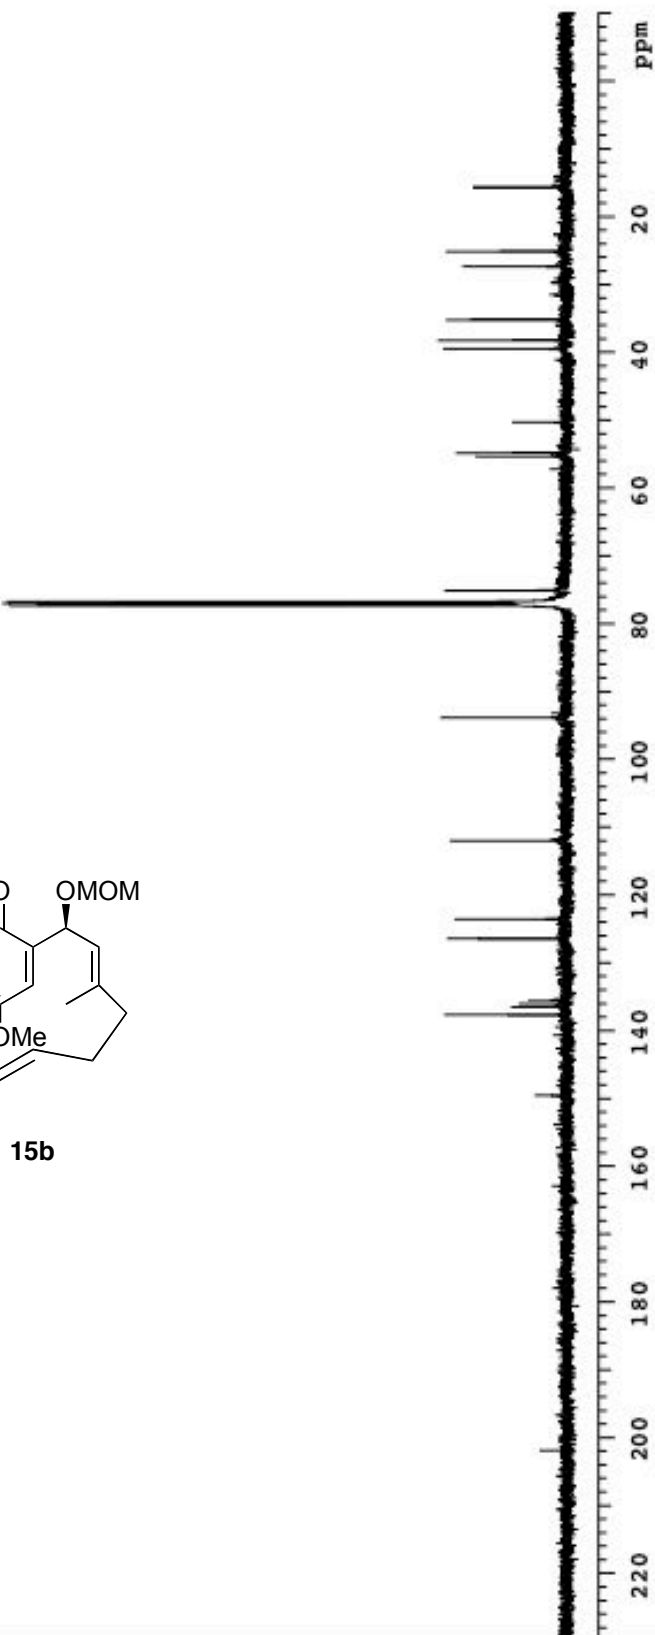

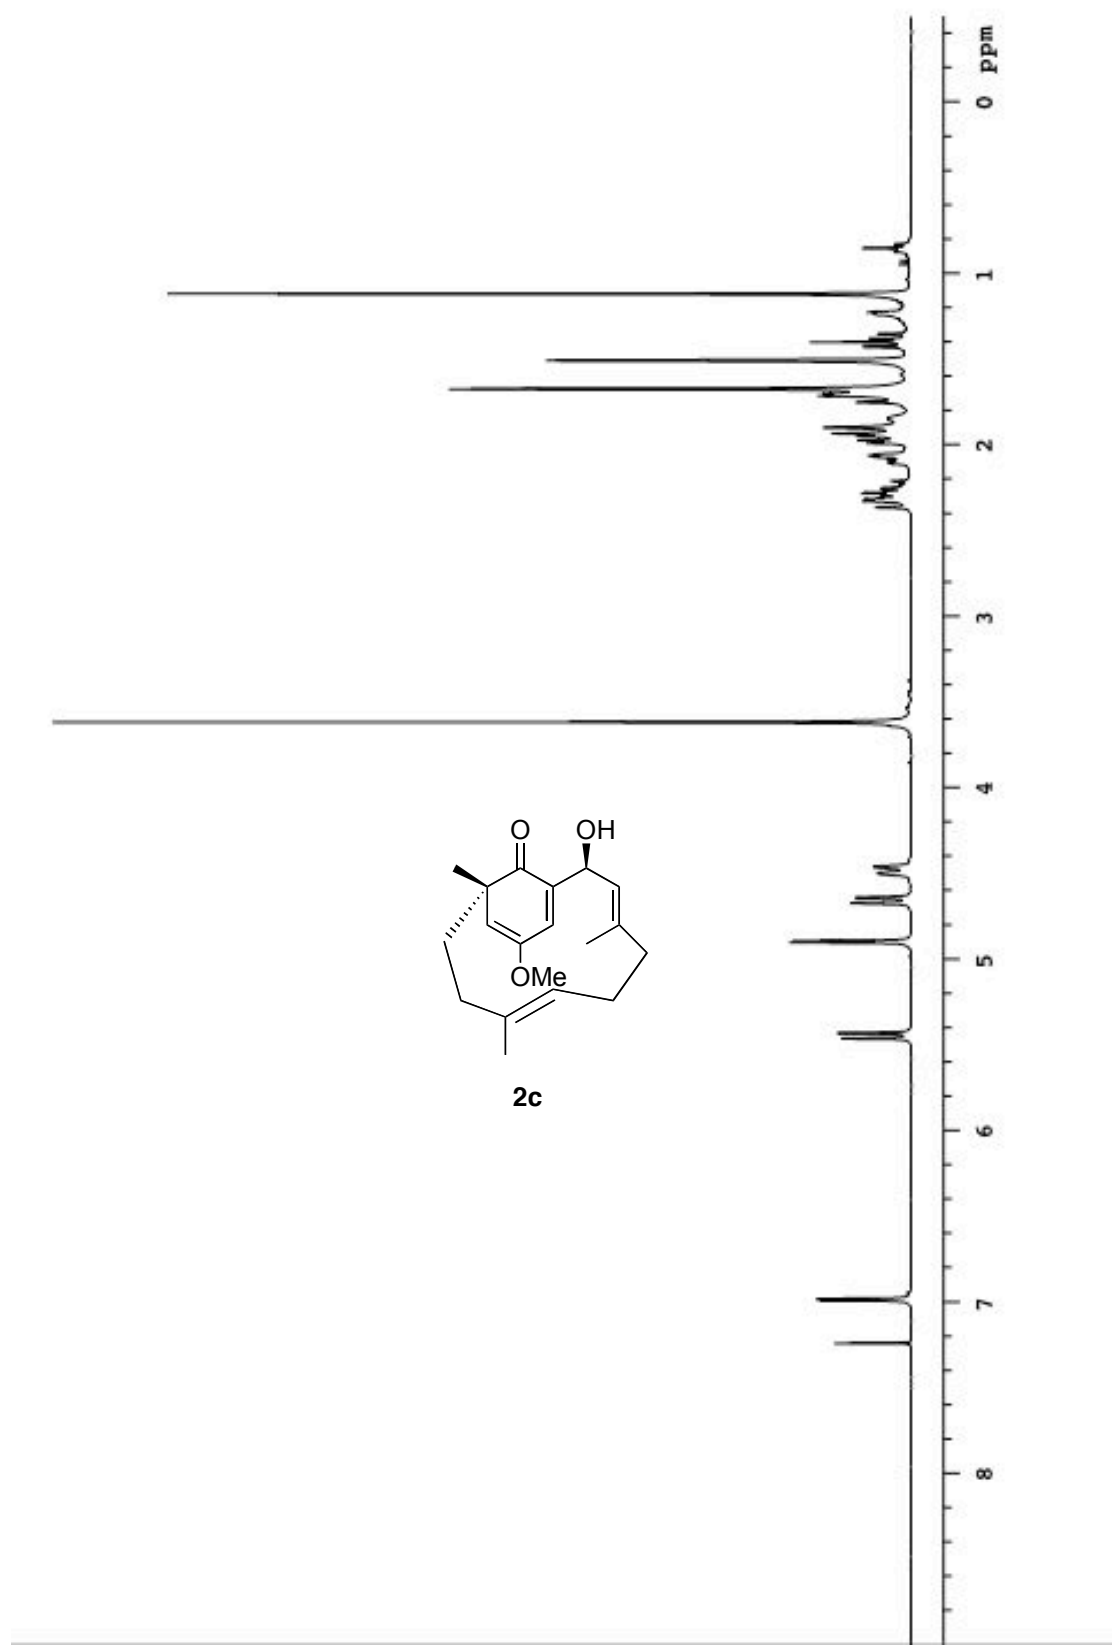

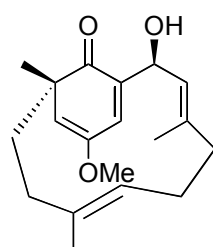

2c

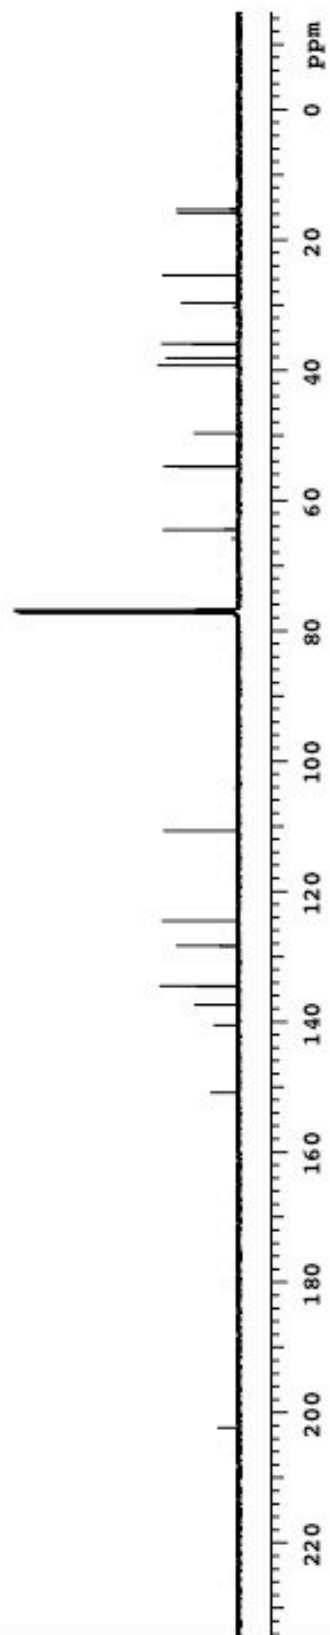

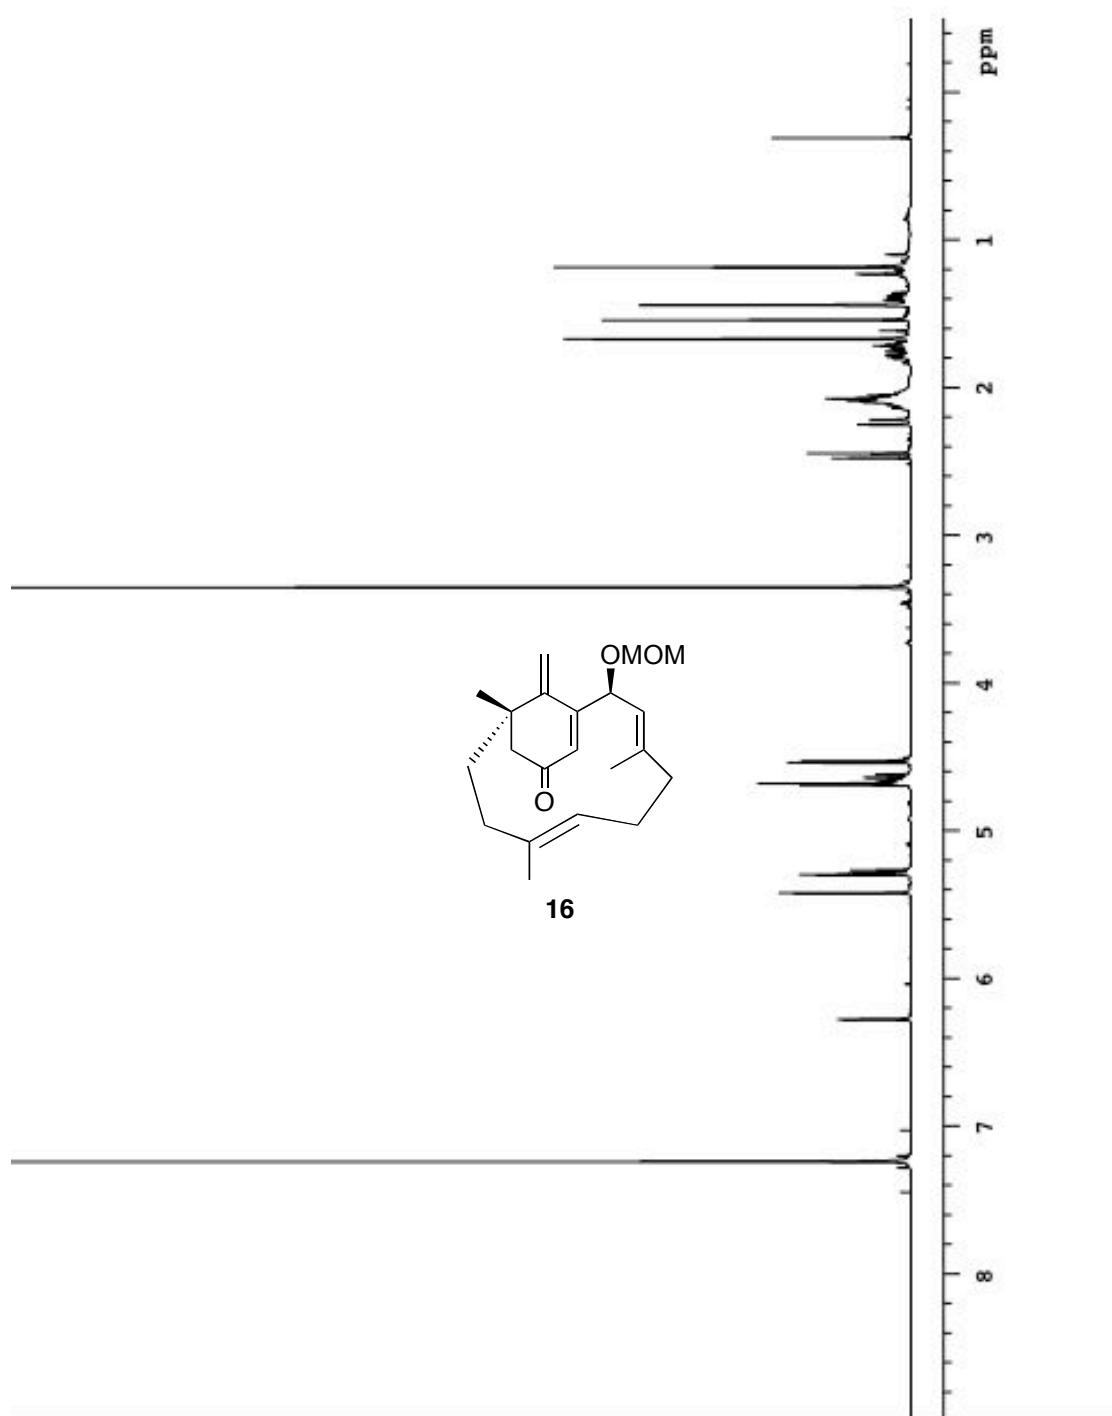



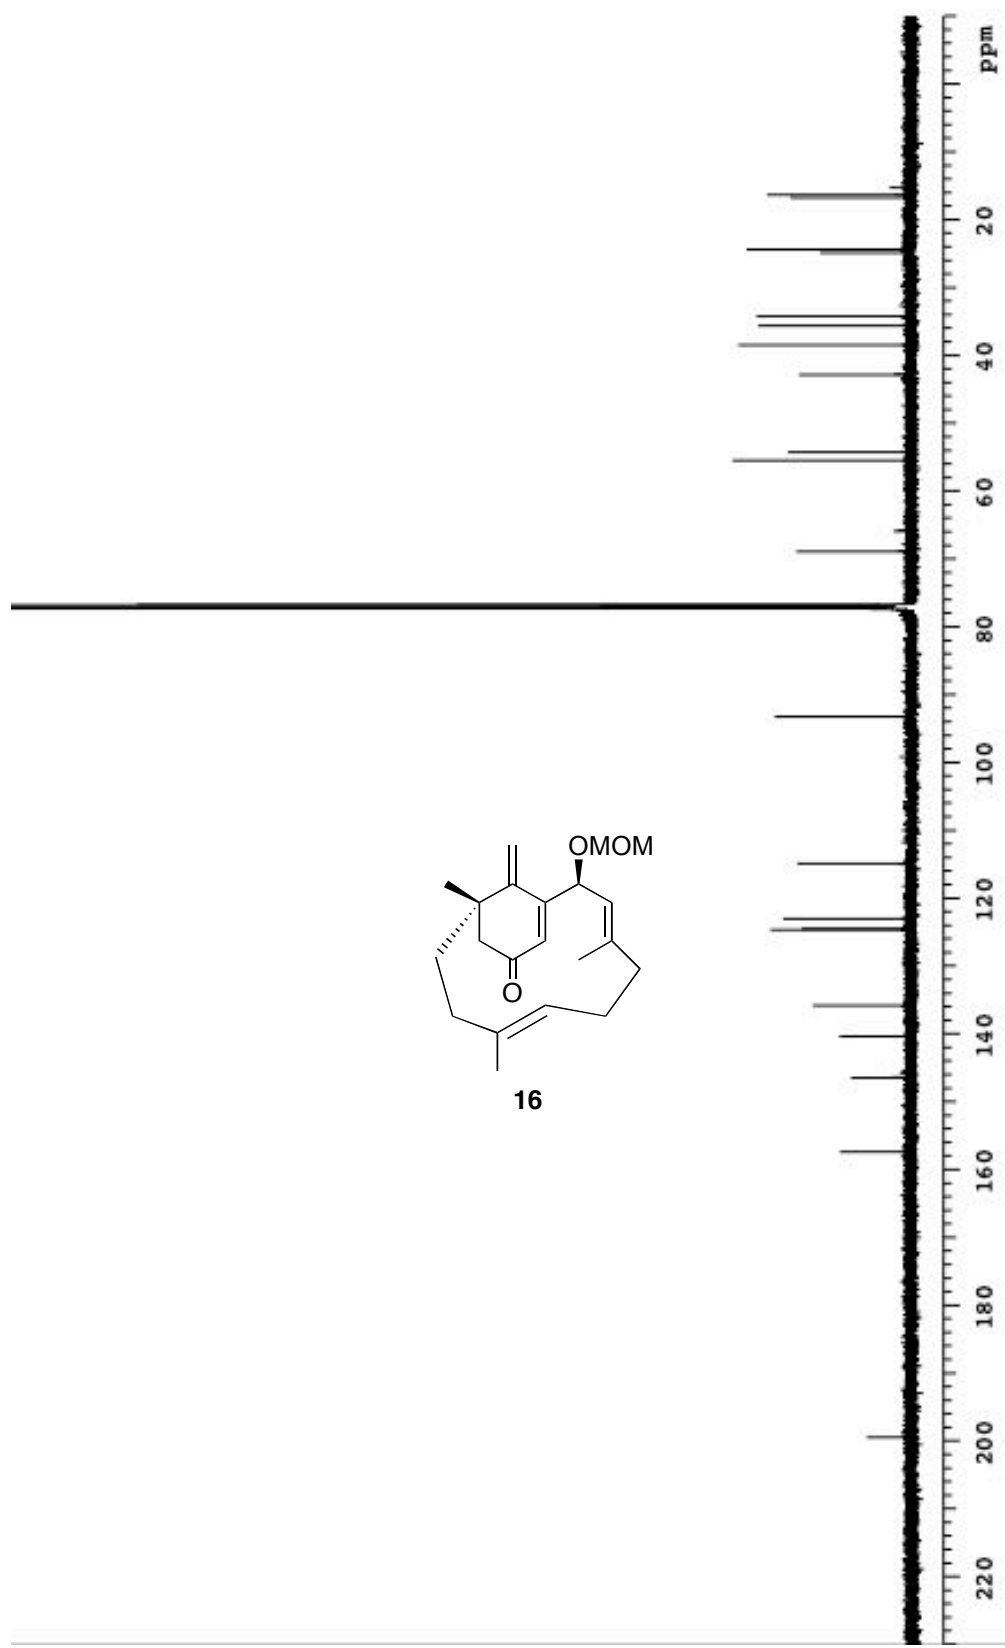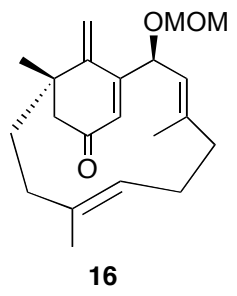

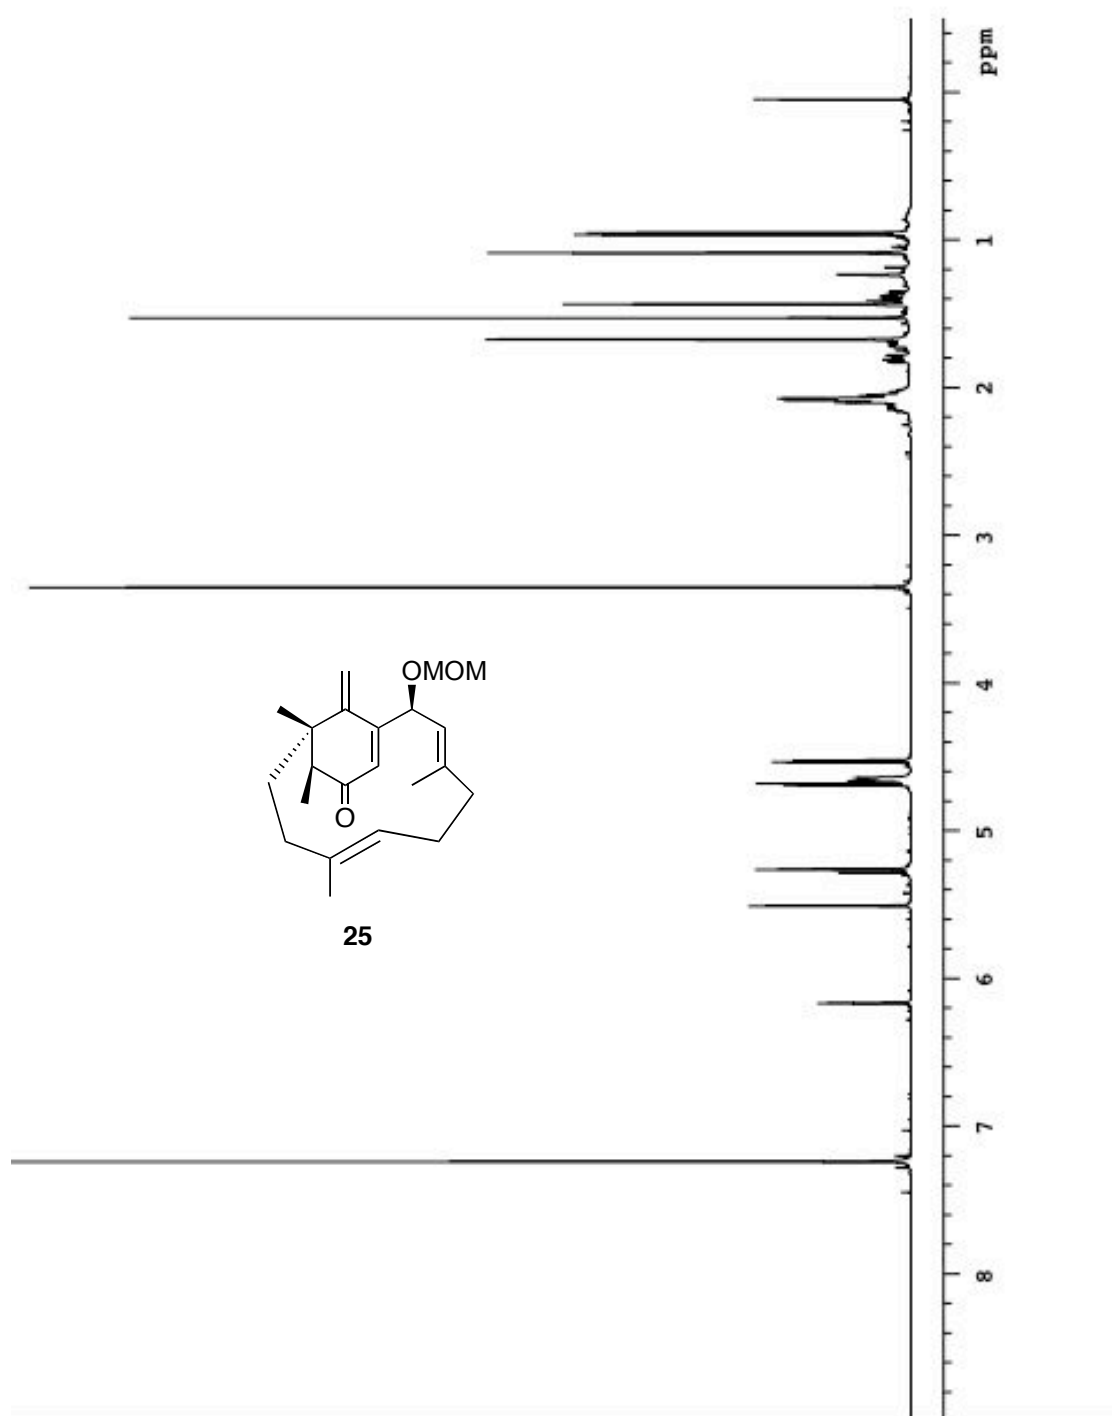

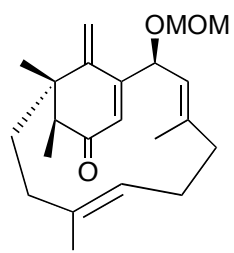

25

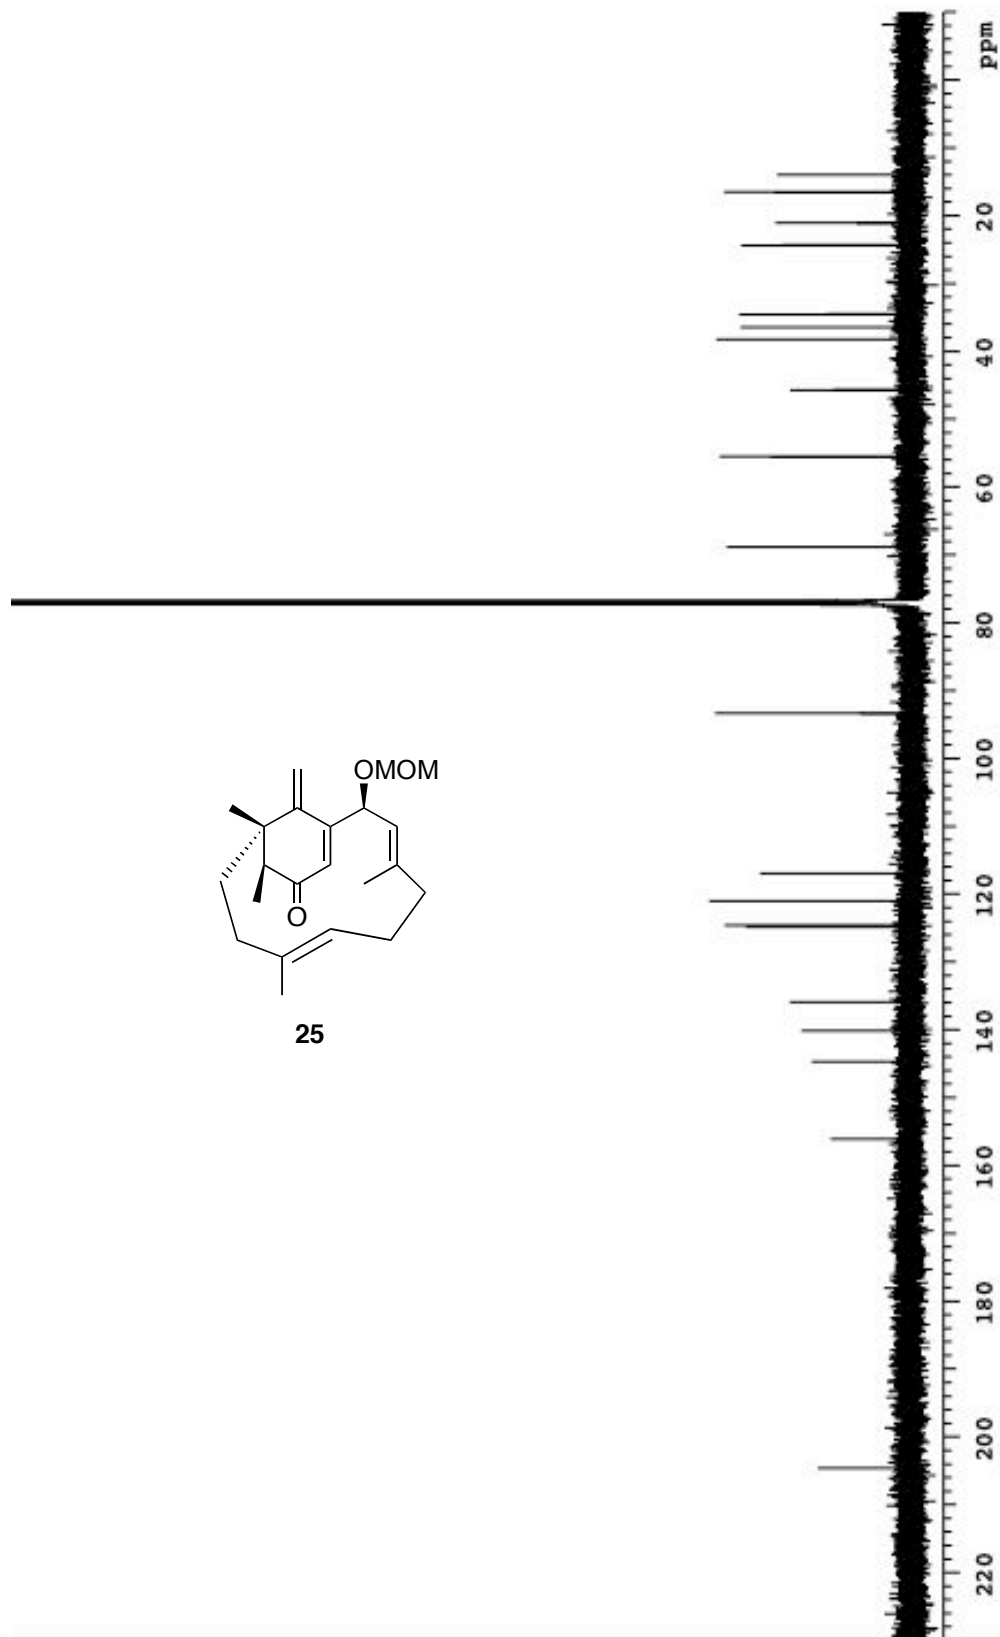

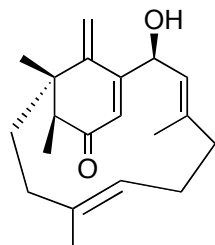

26

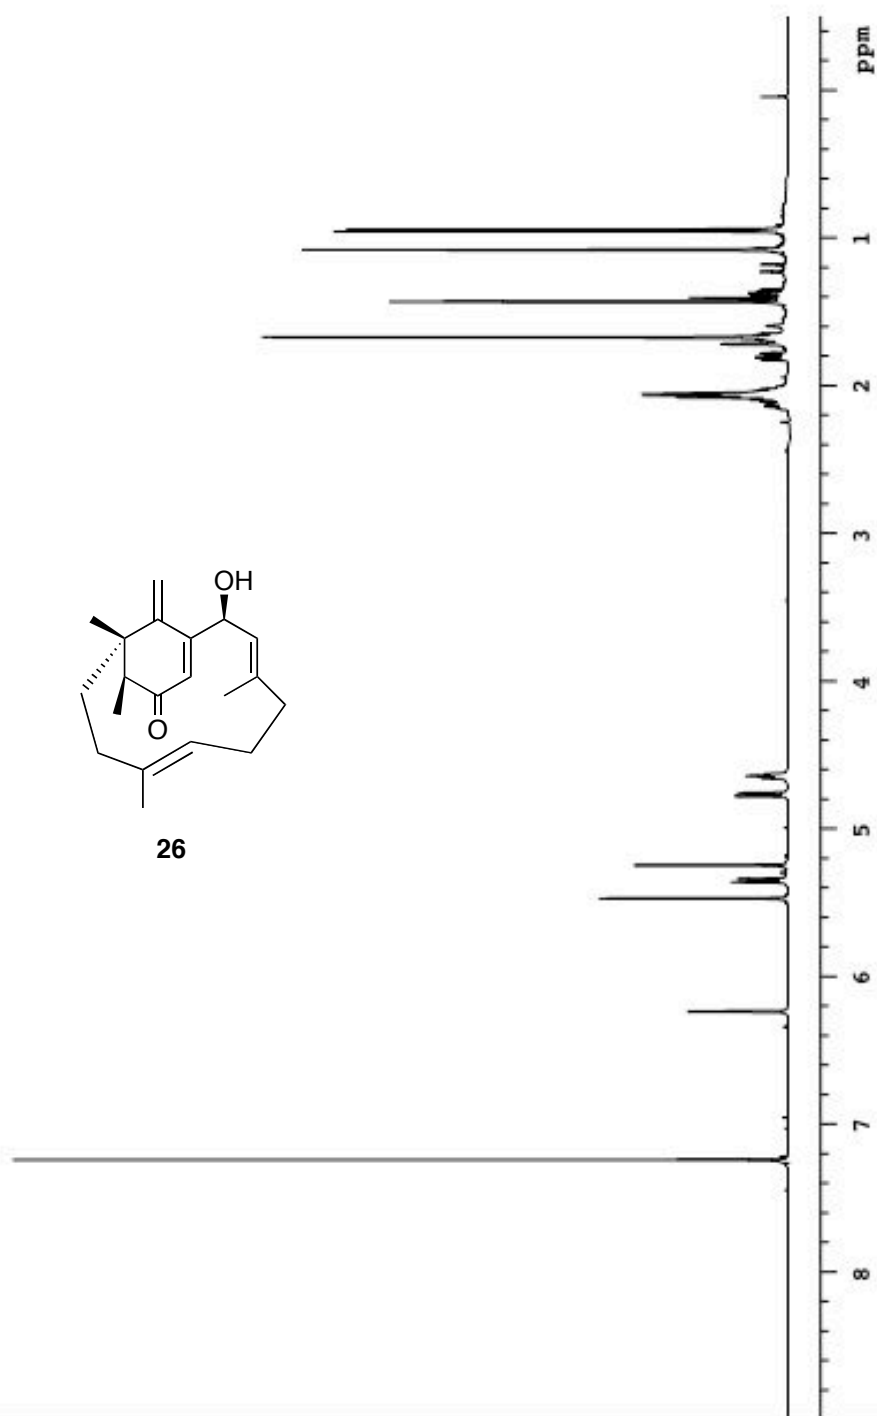

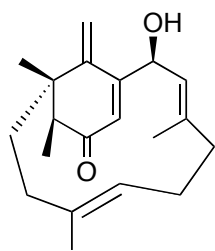

26

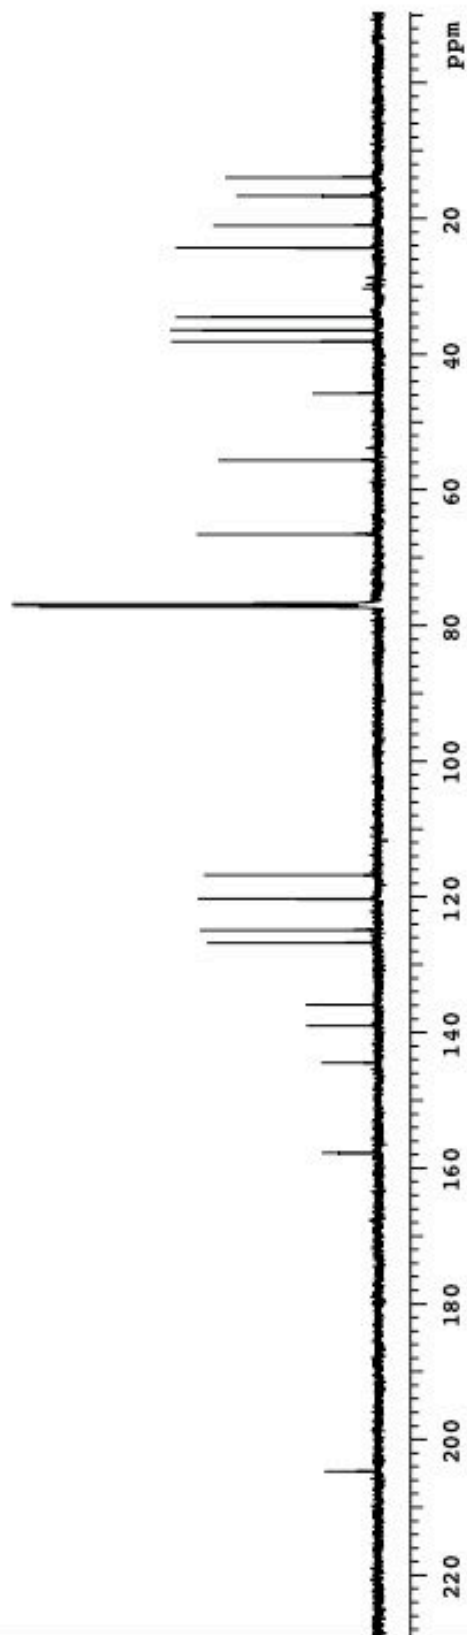

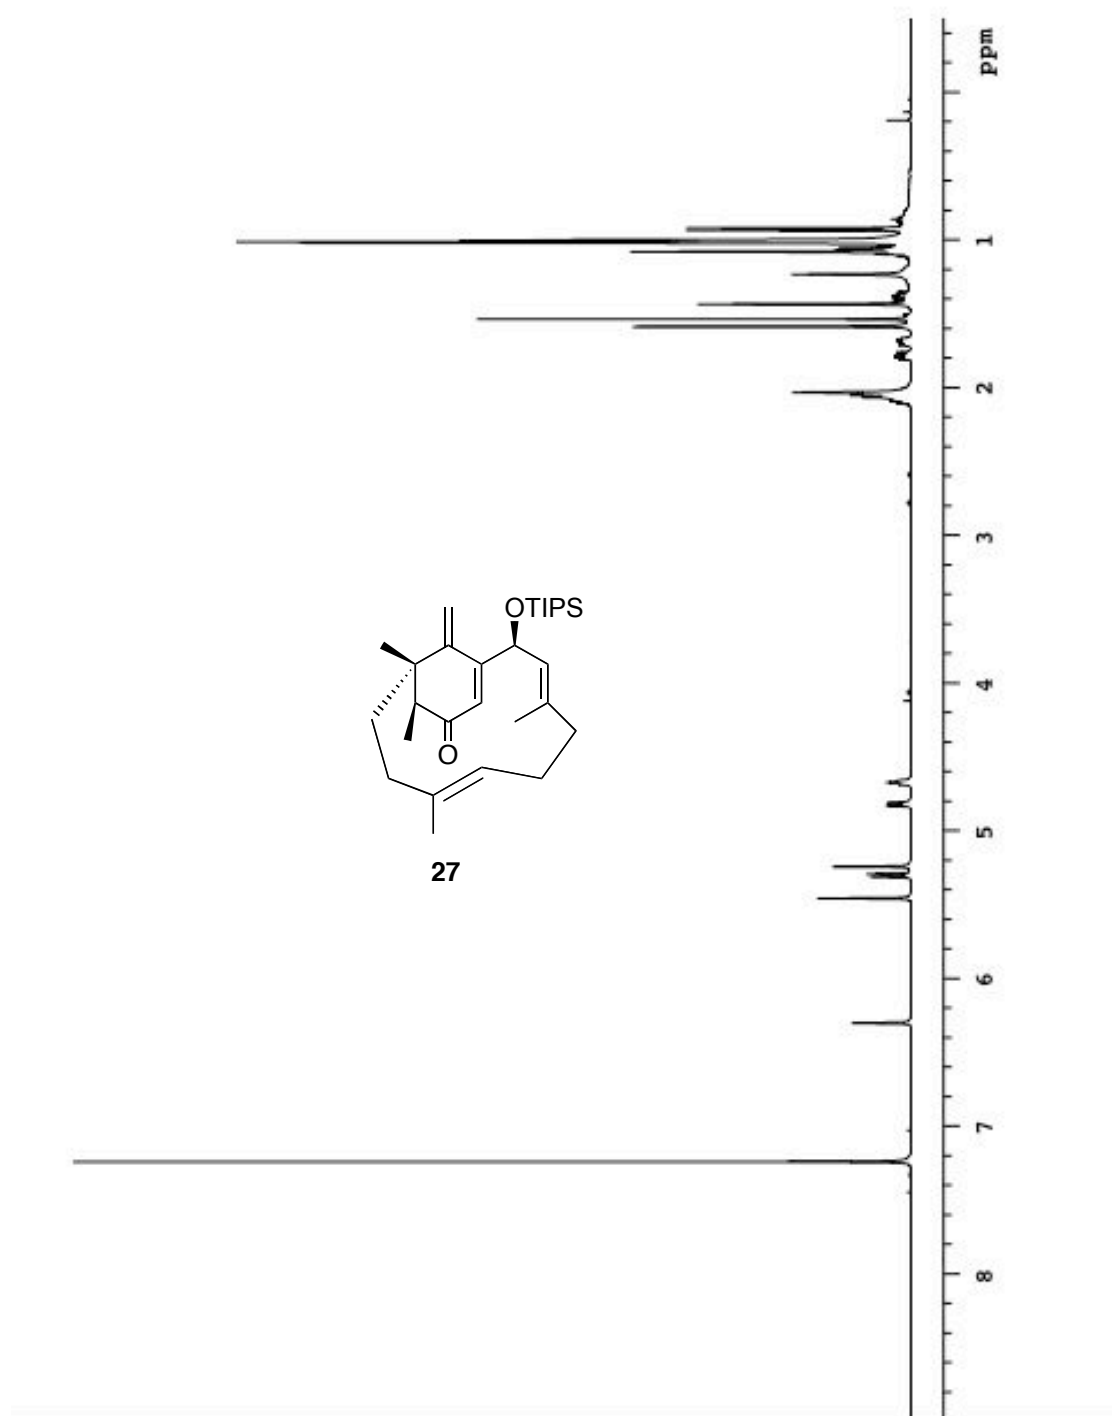

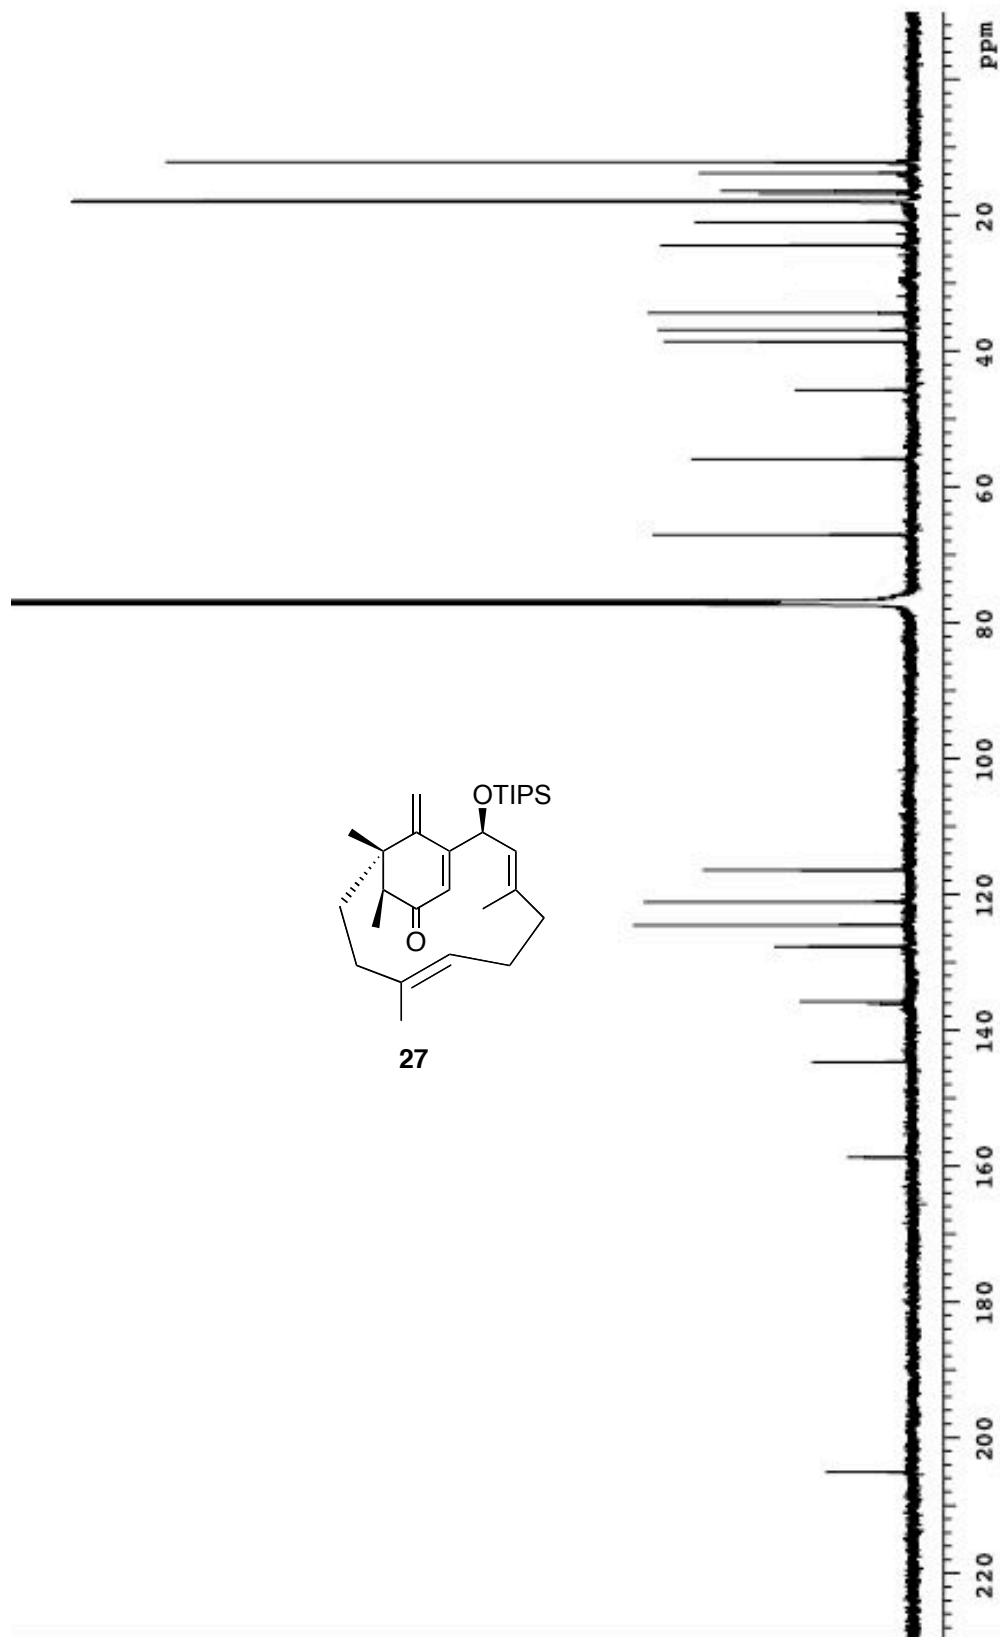

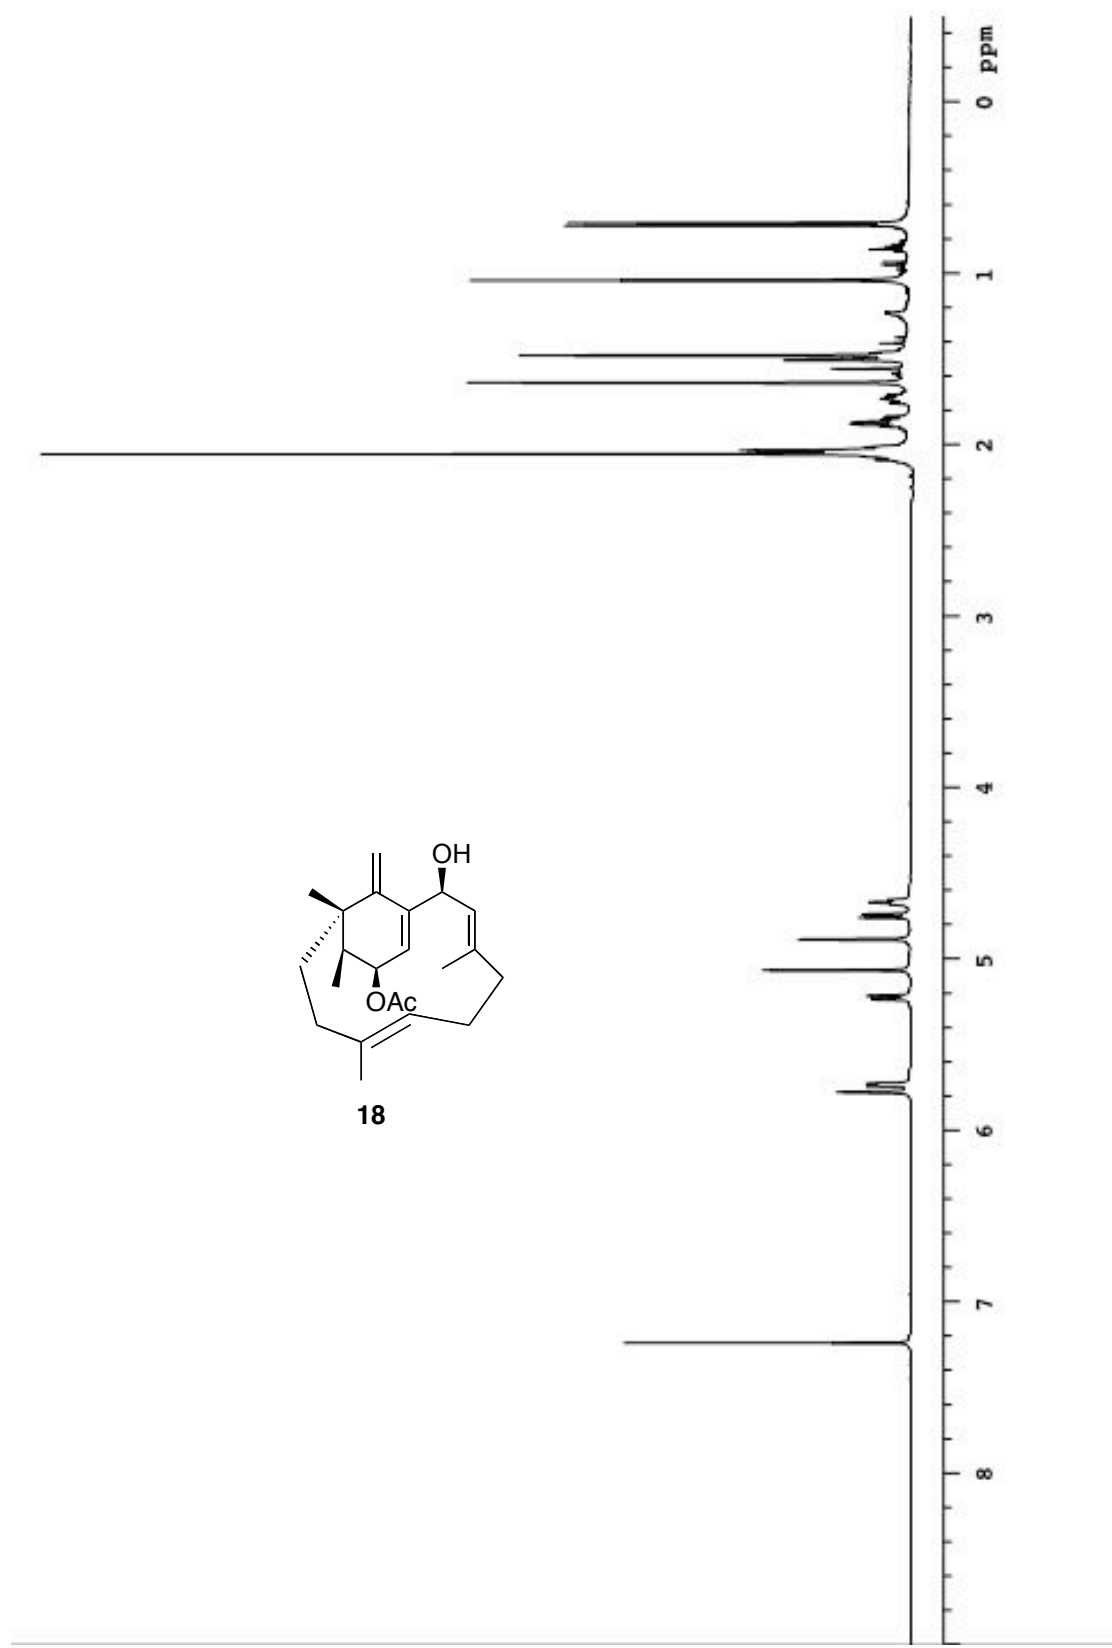



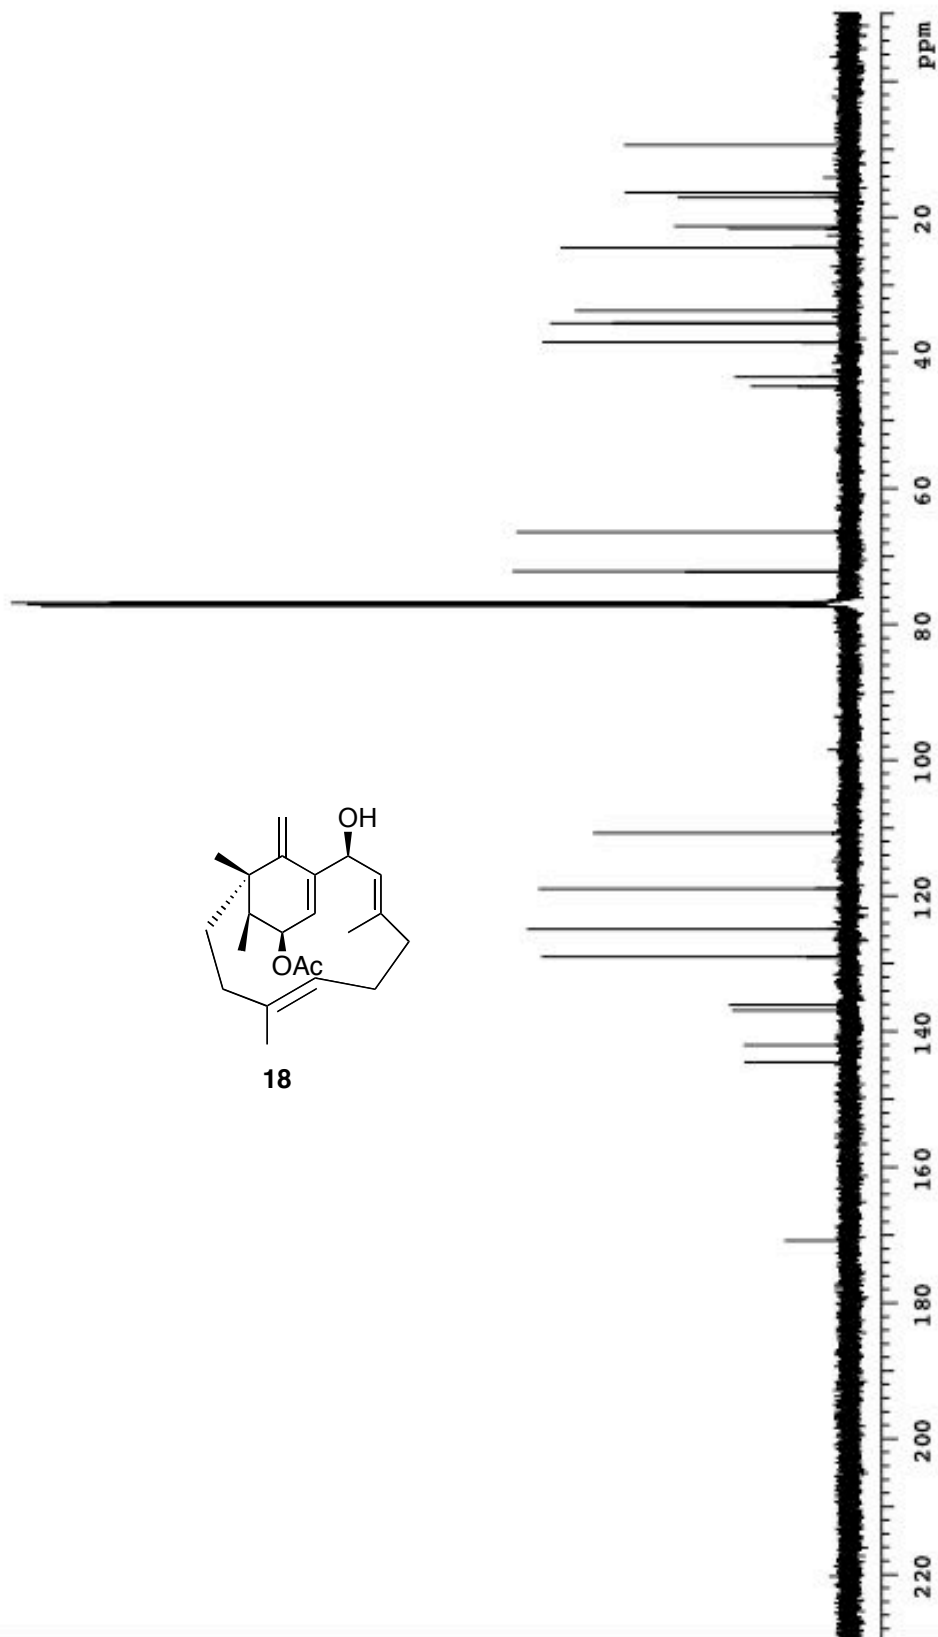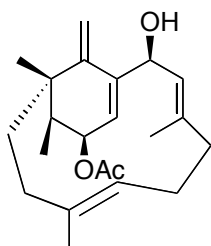

18

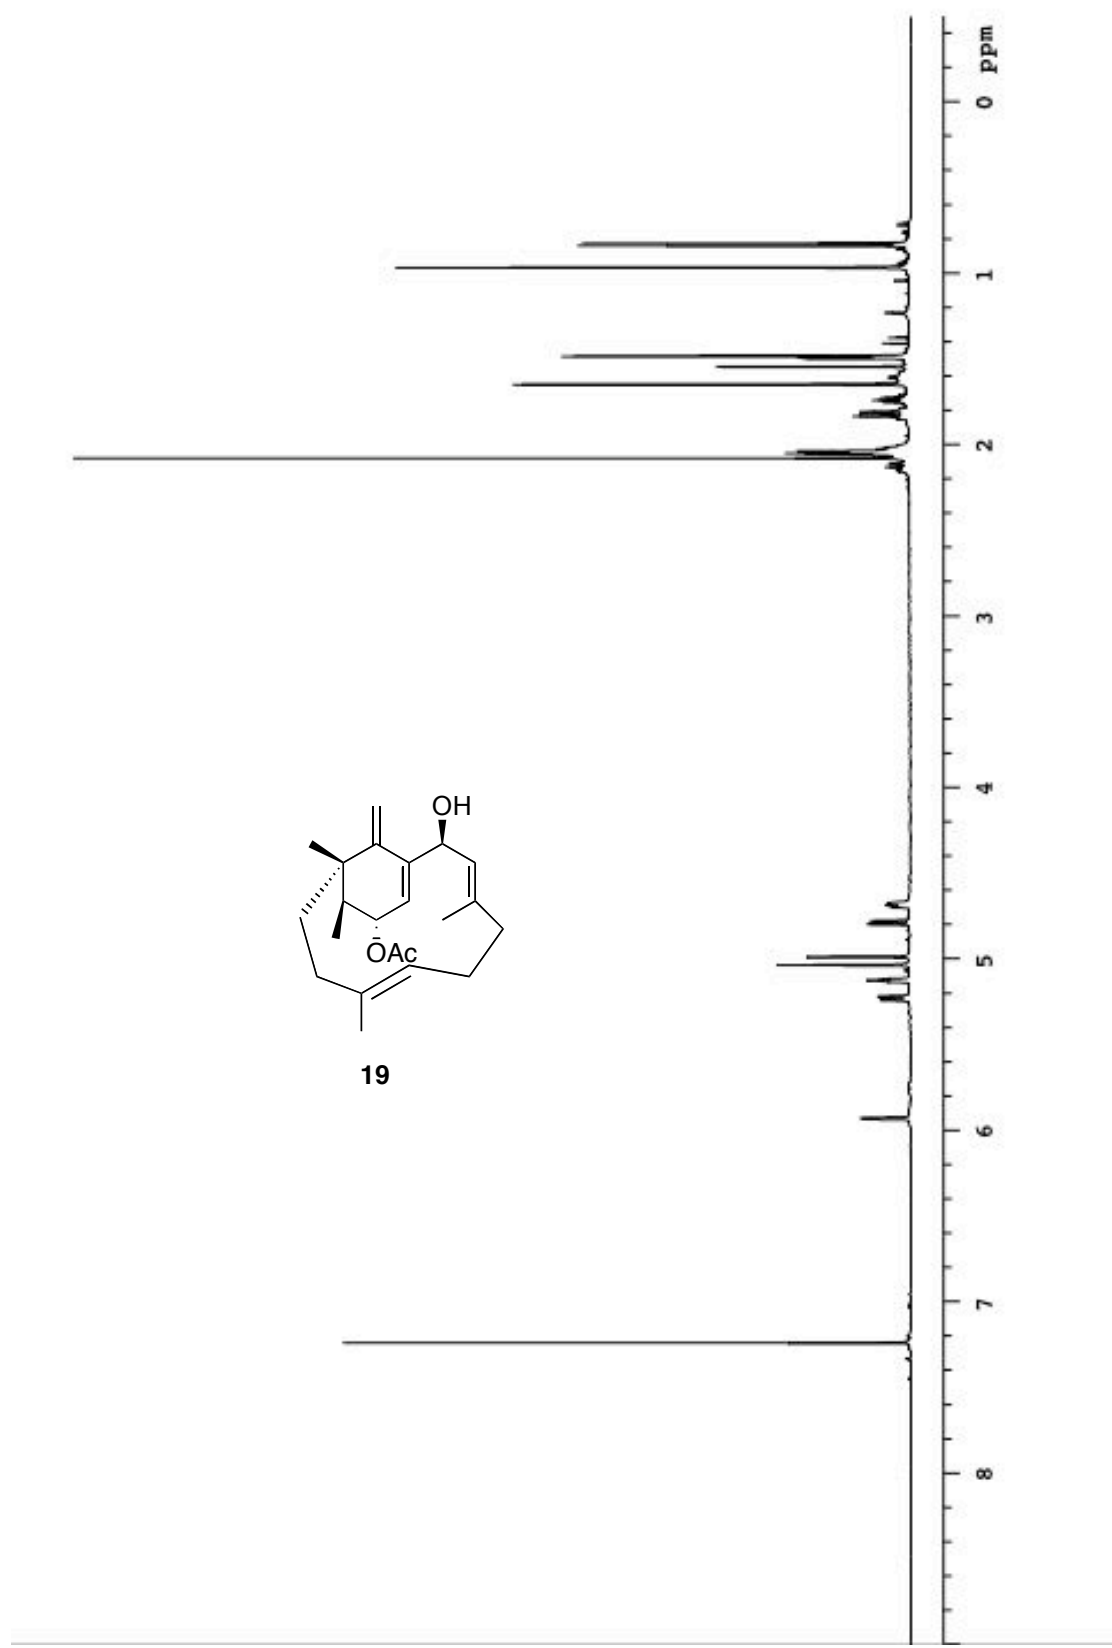

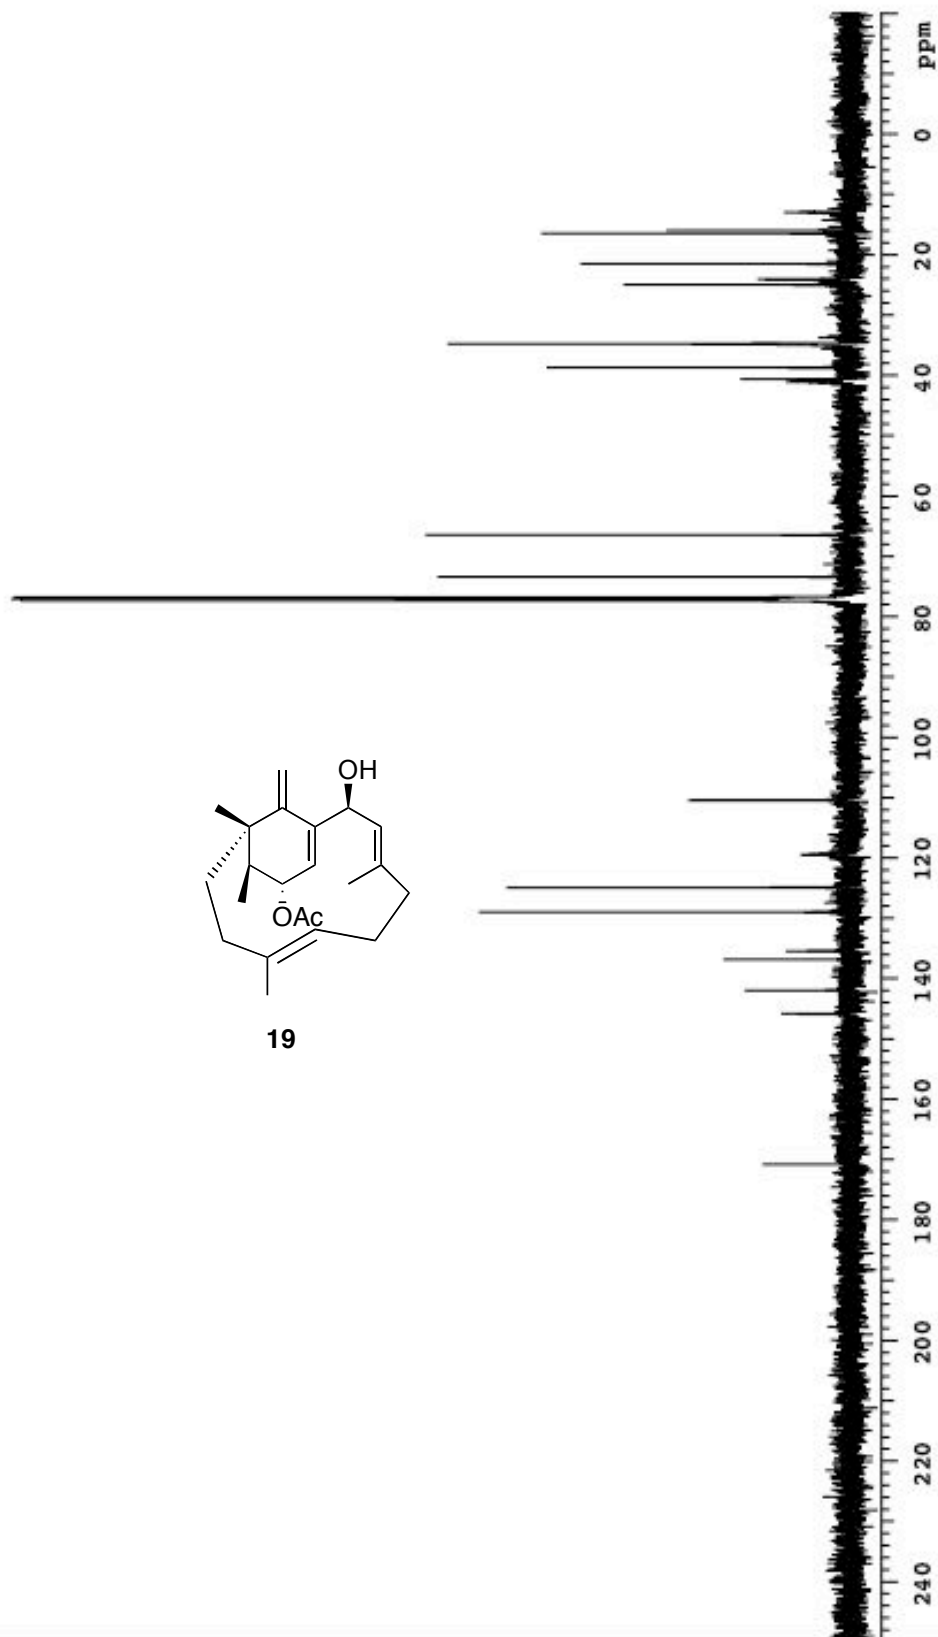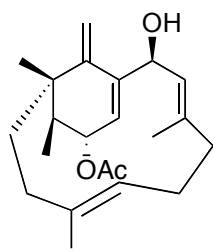

19

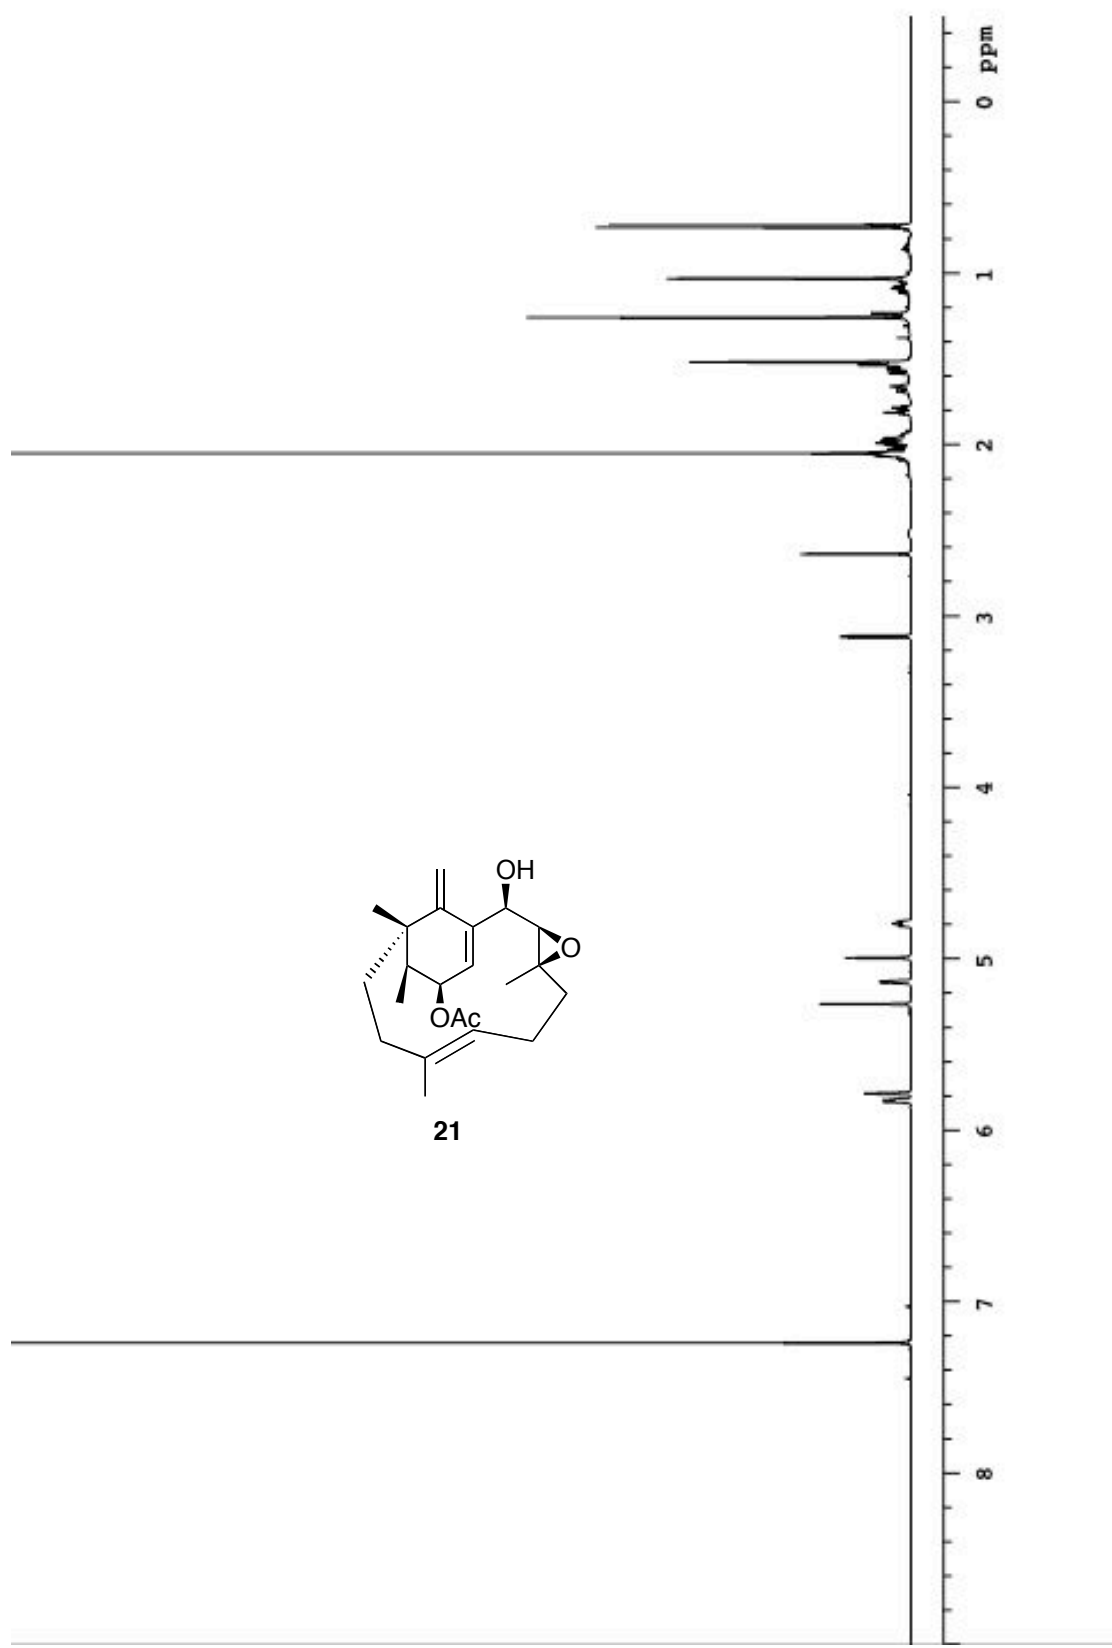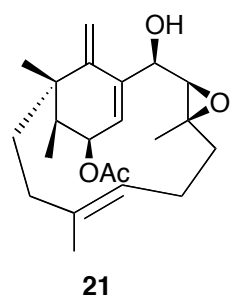

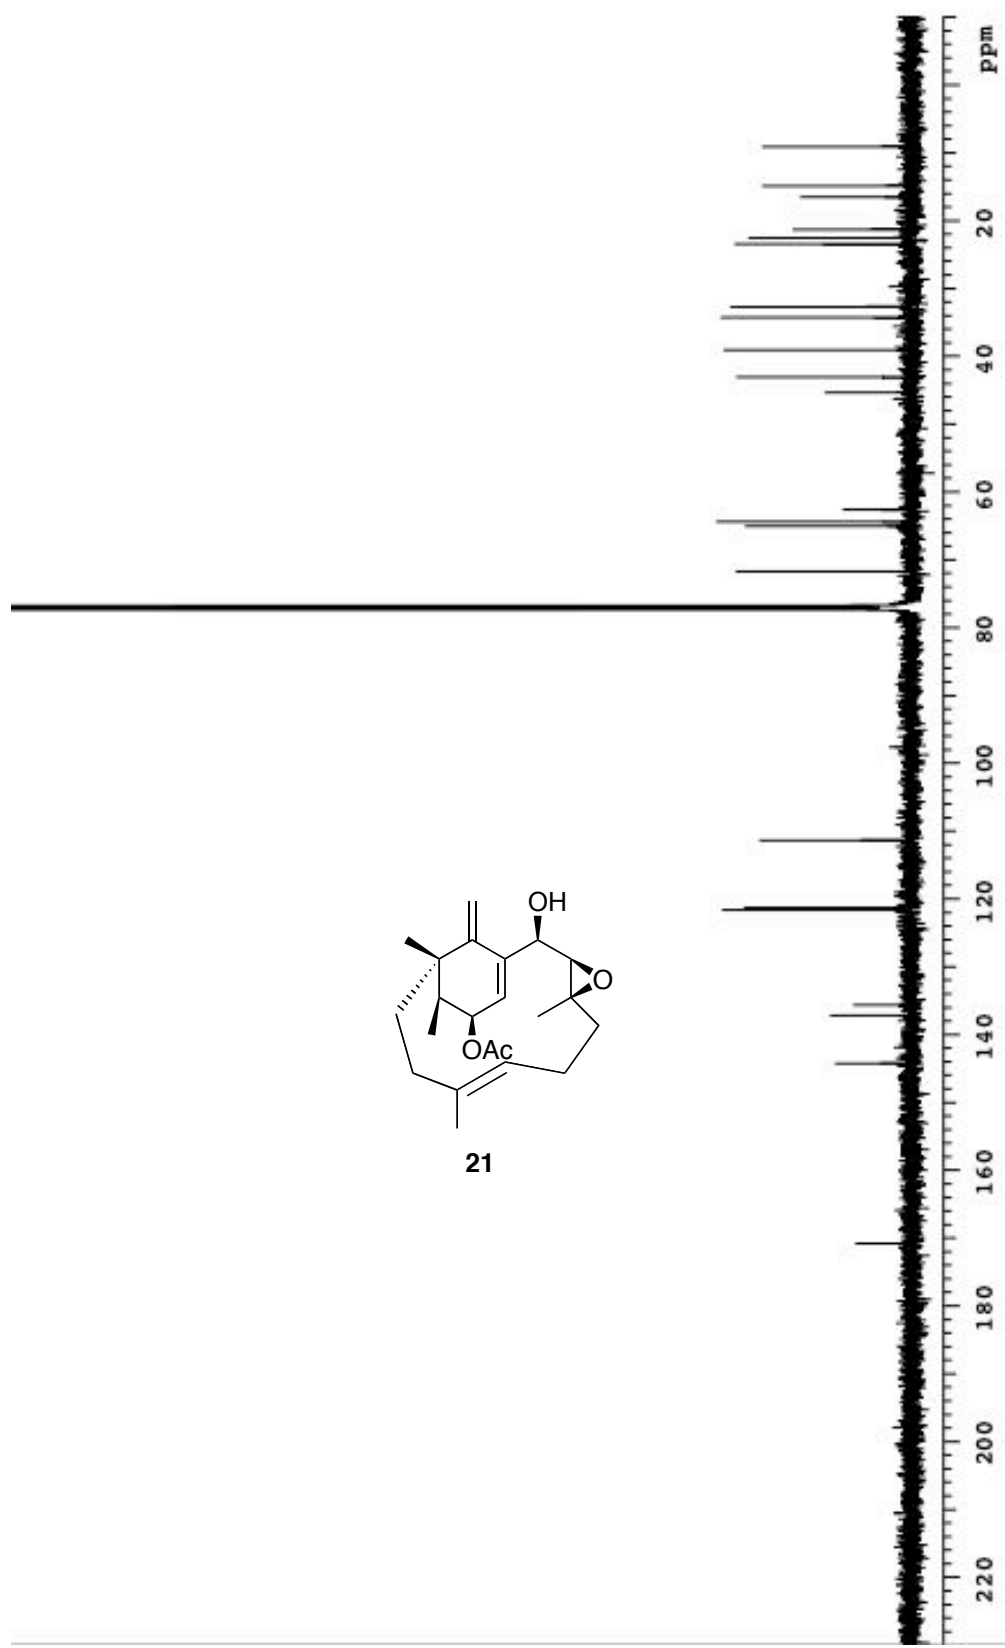

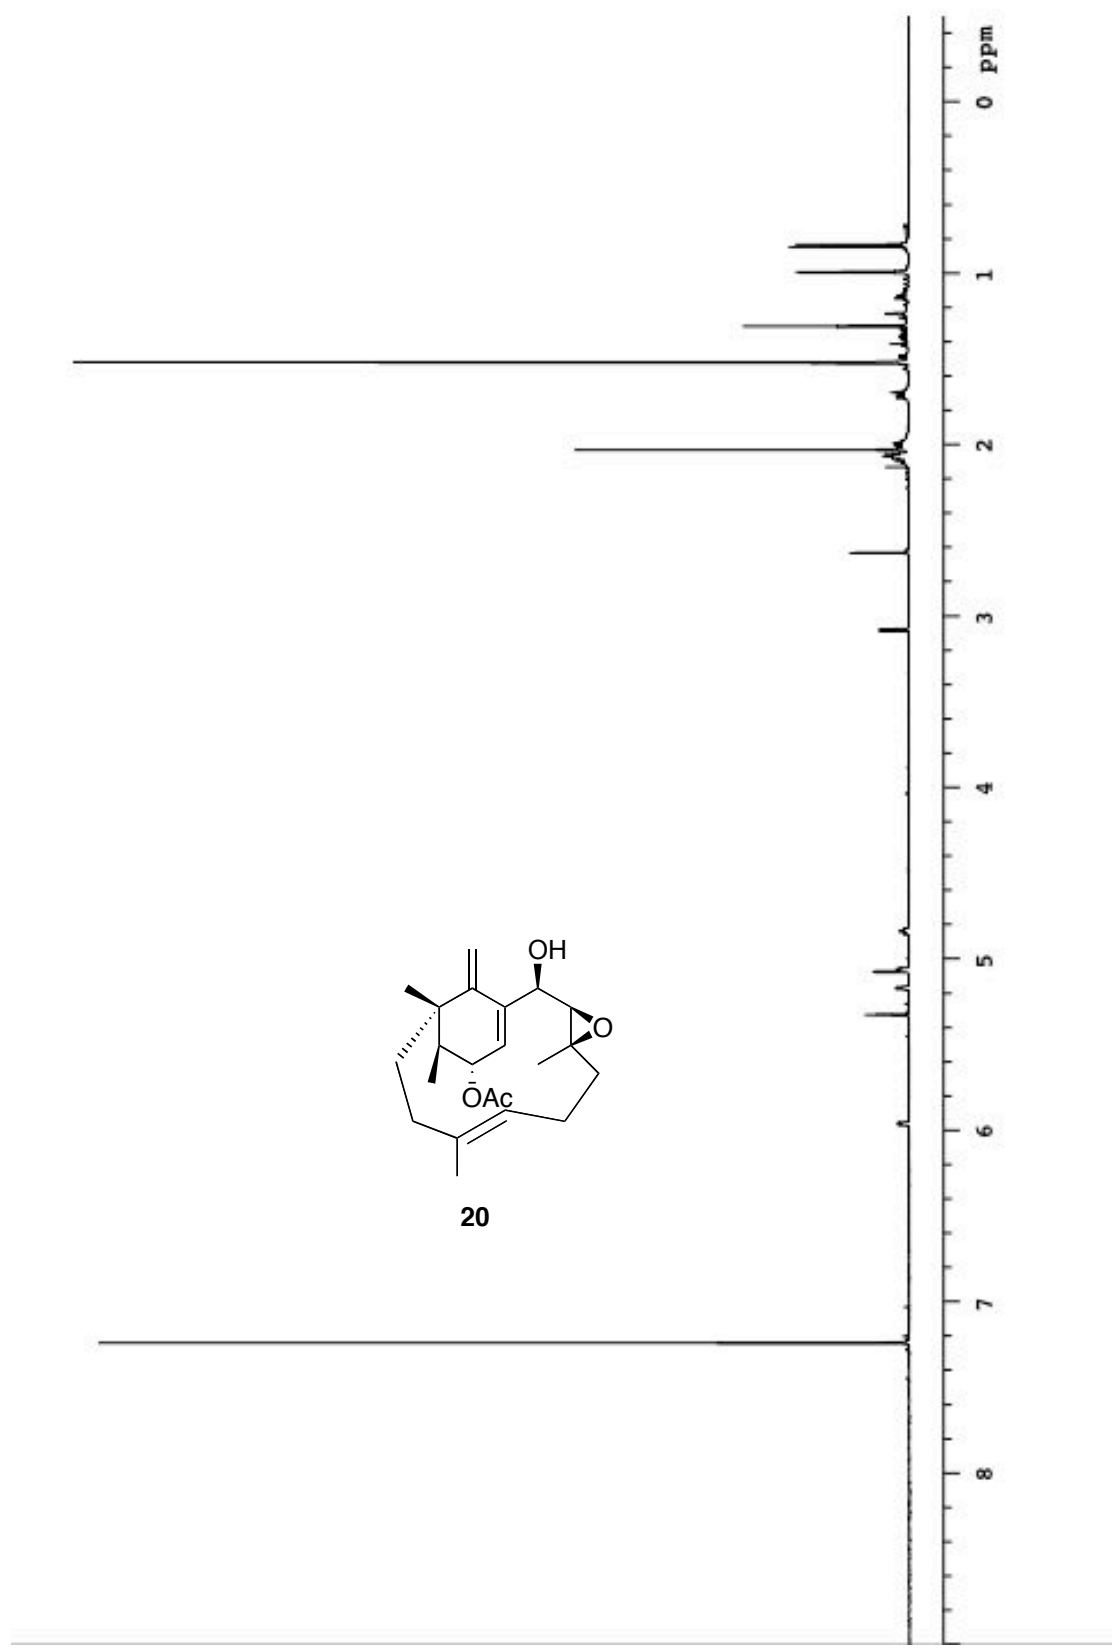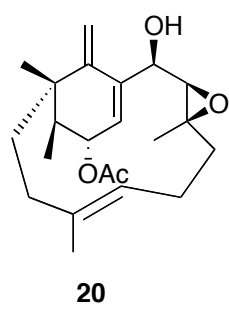

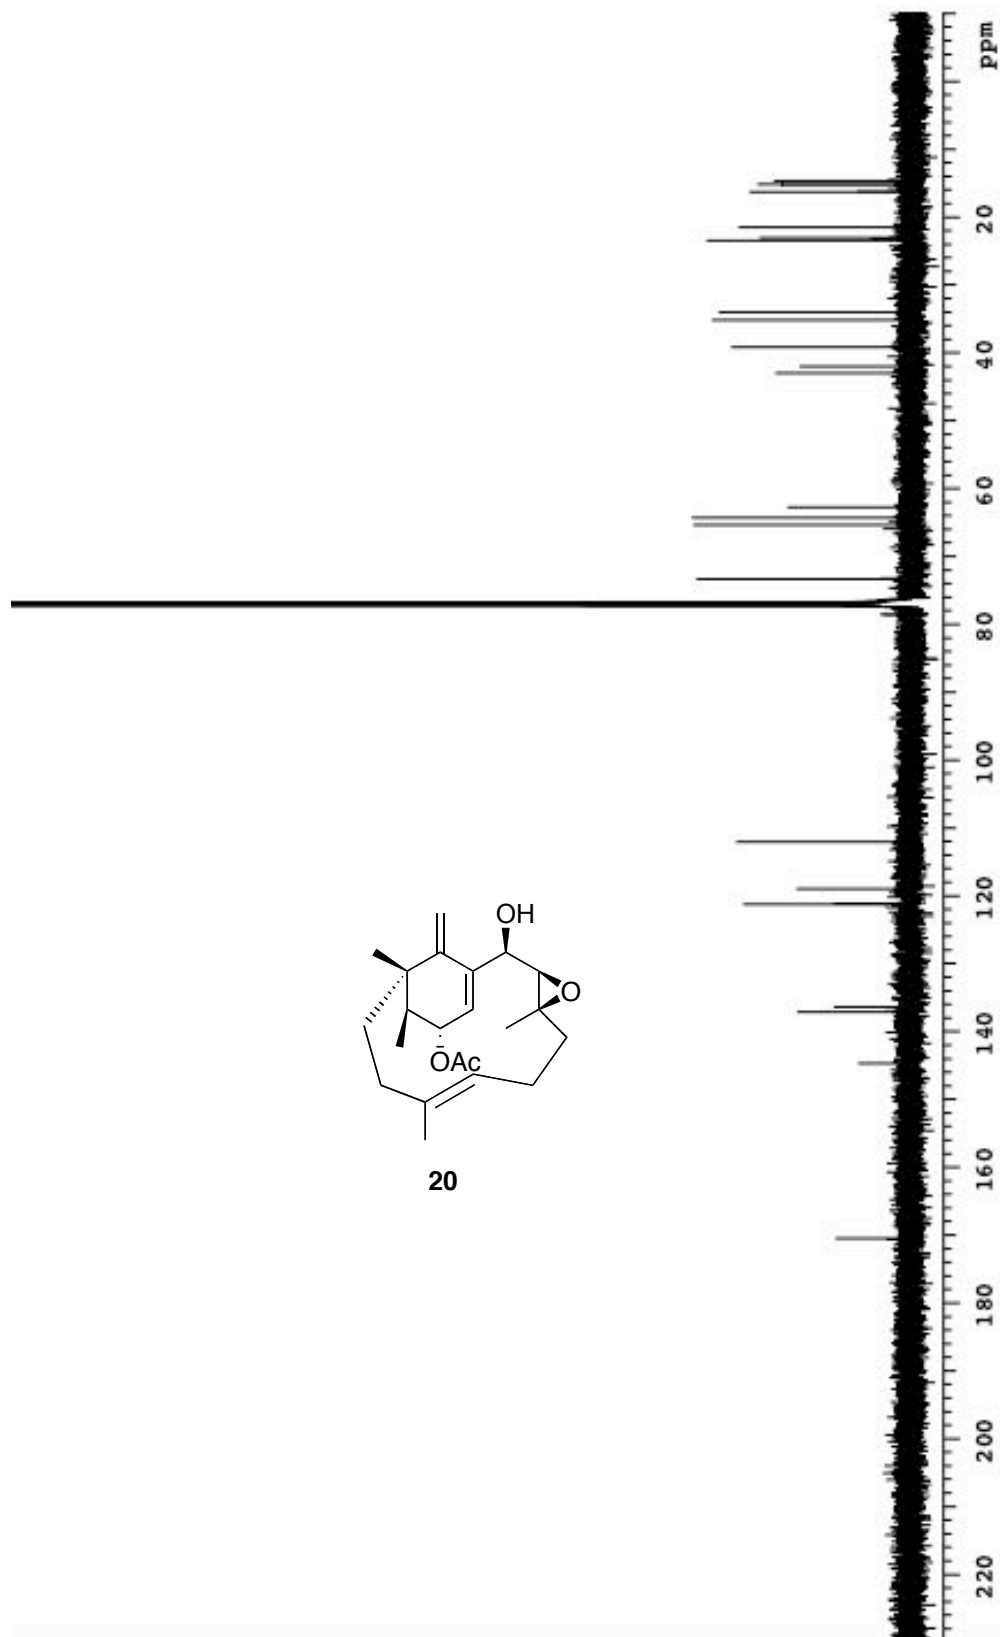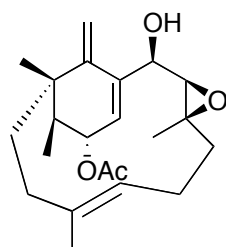

20

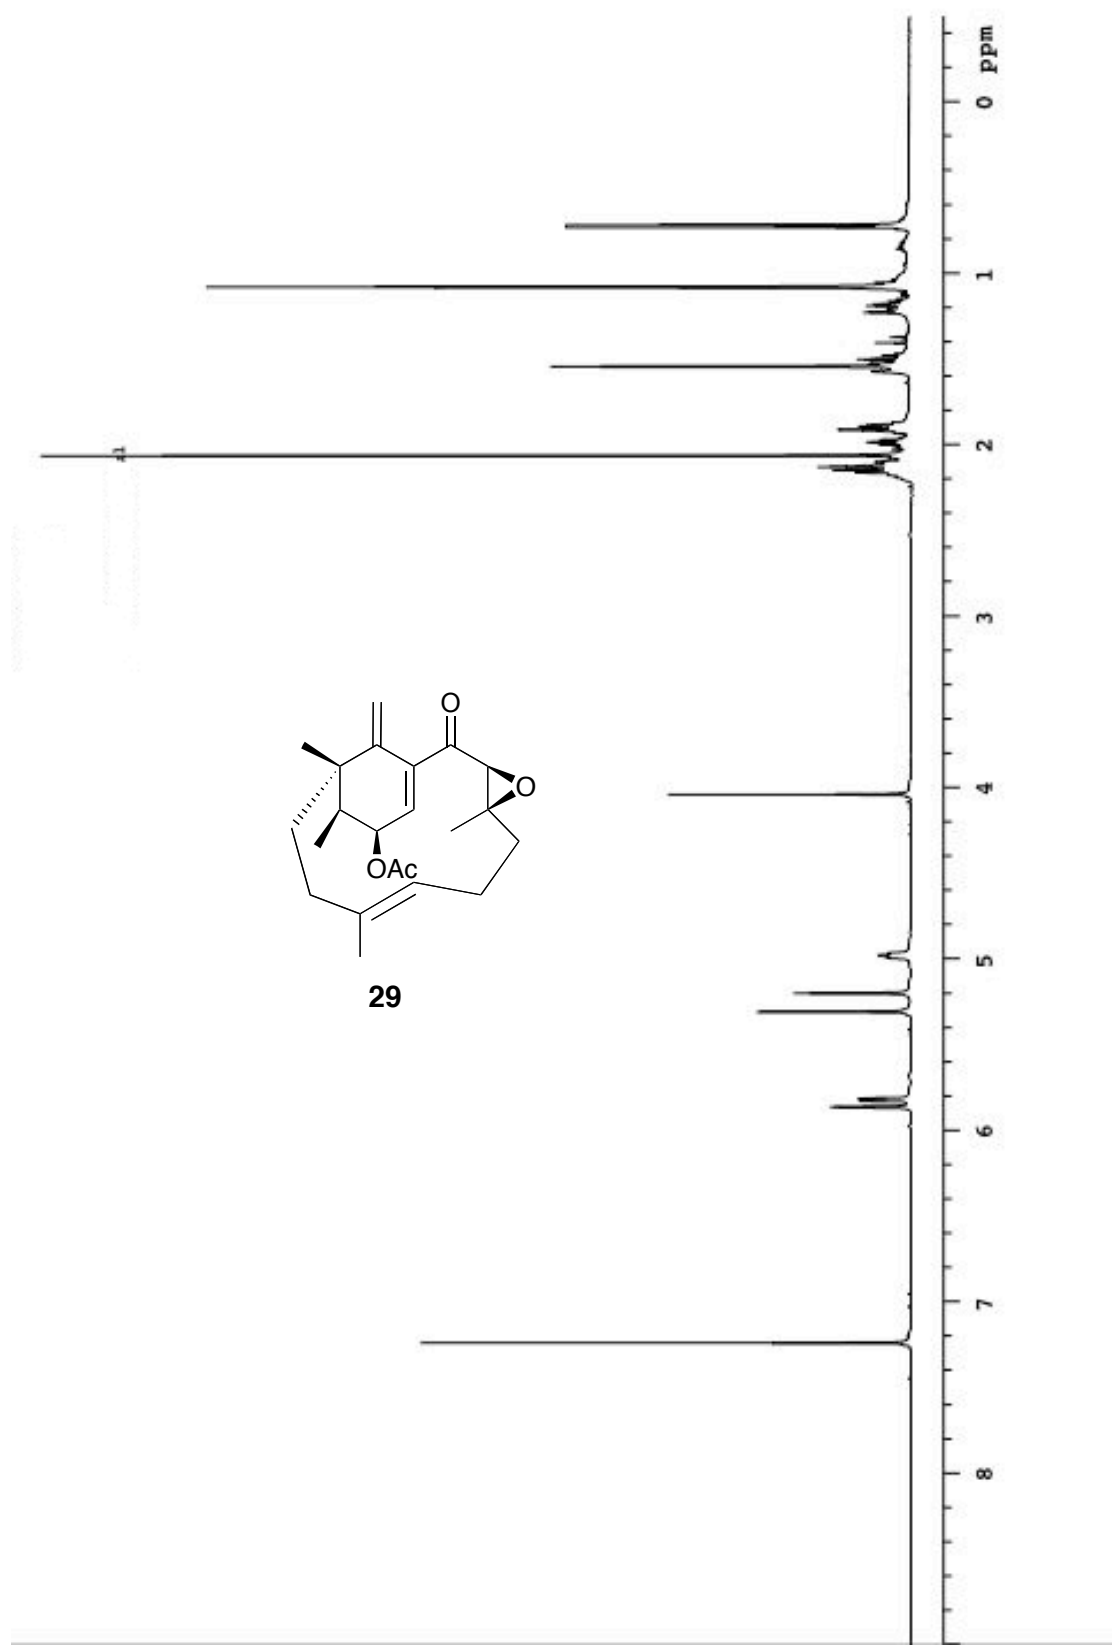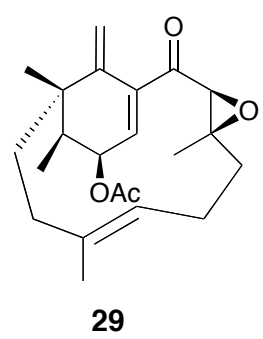



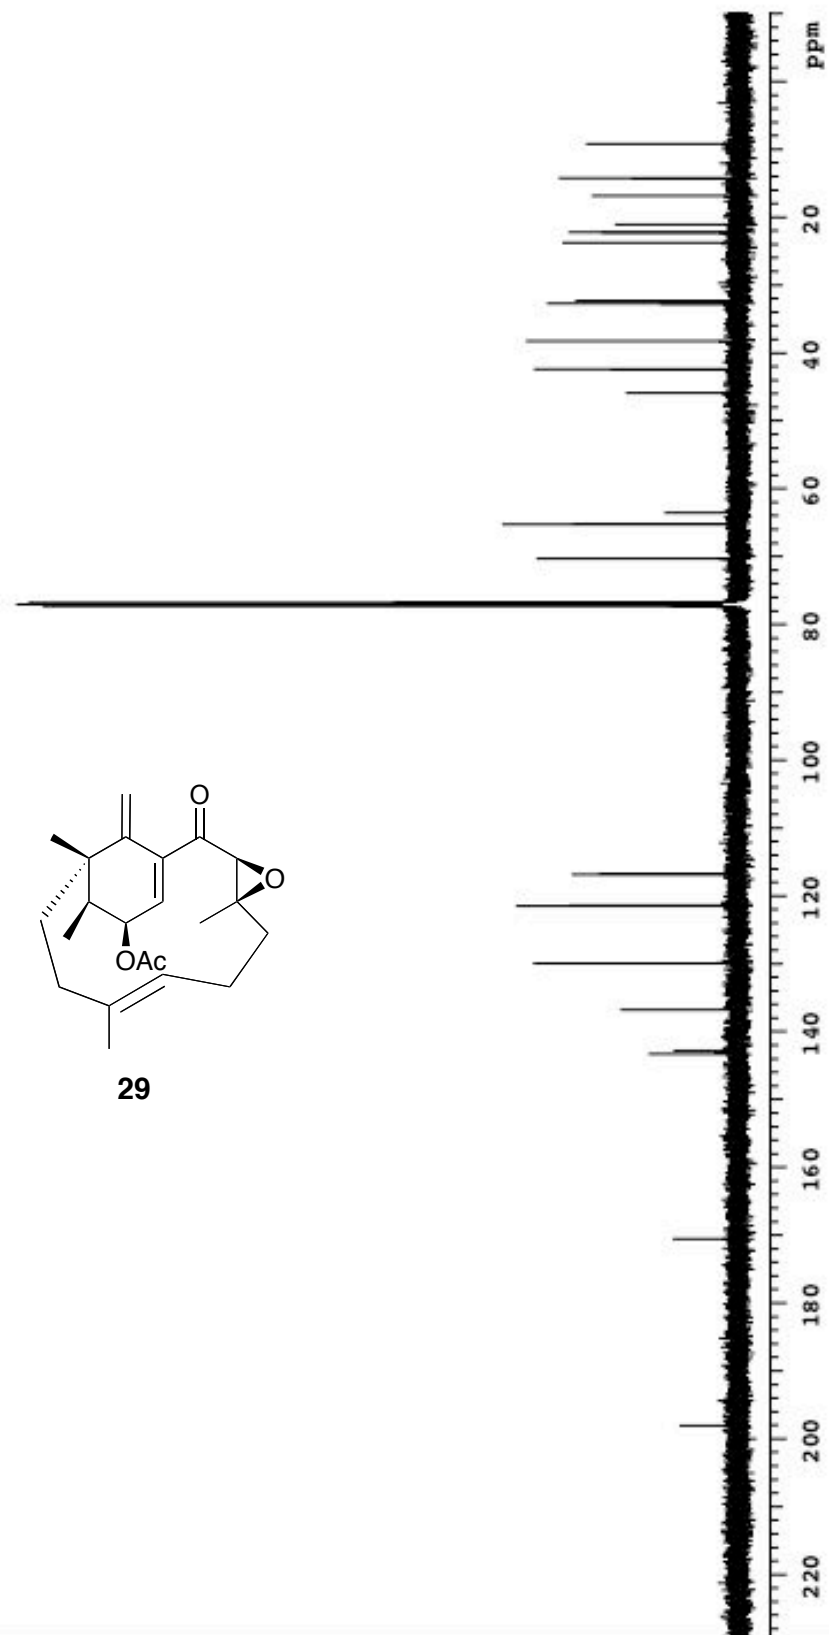

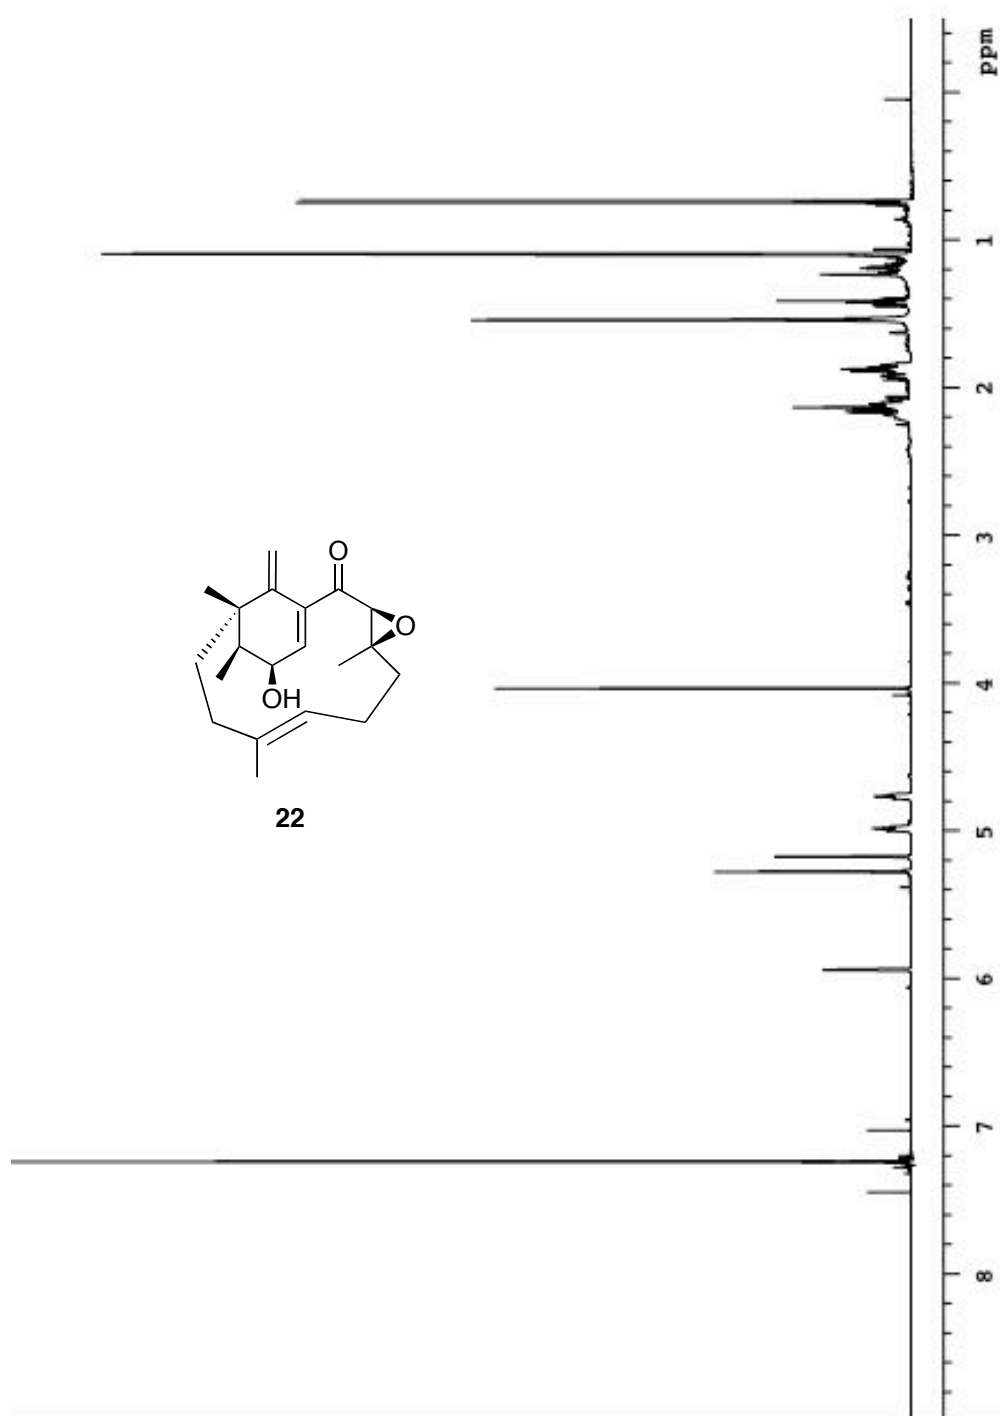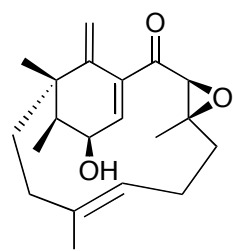

22

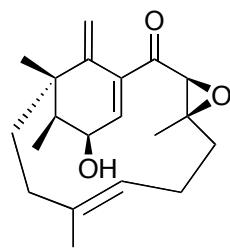

22

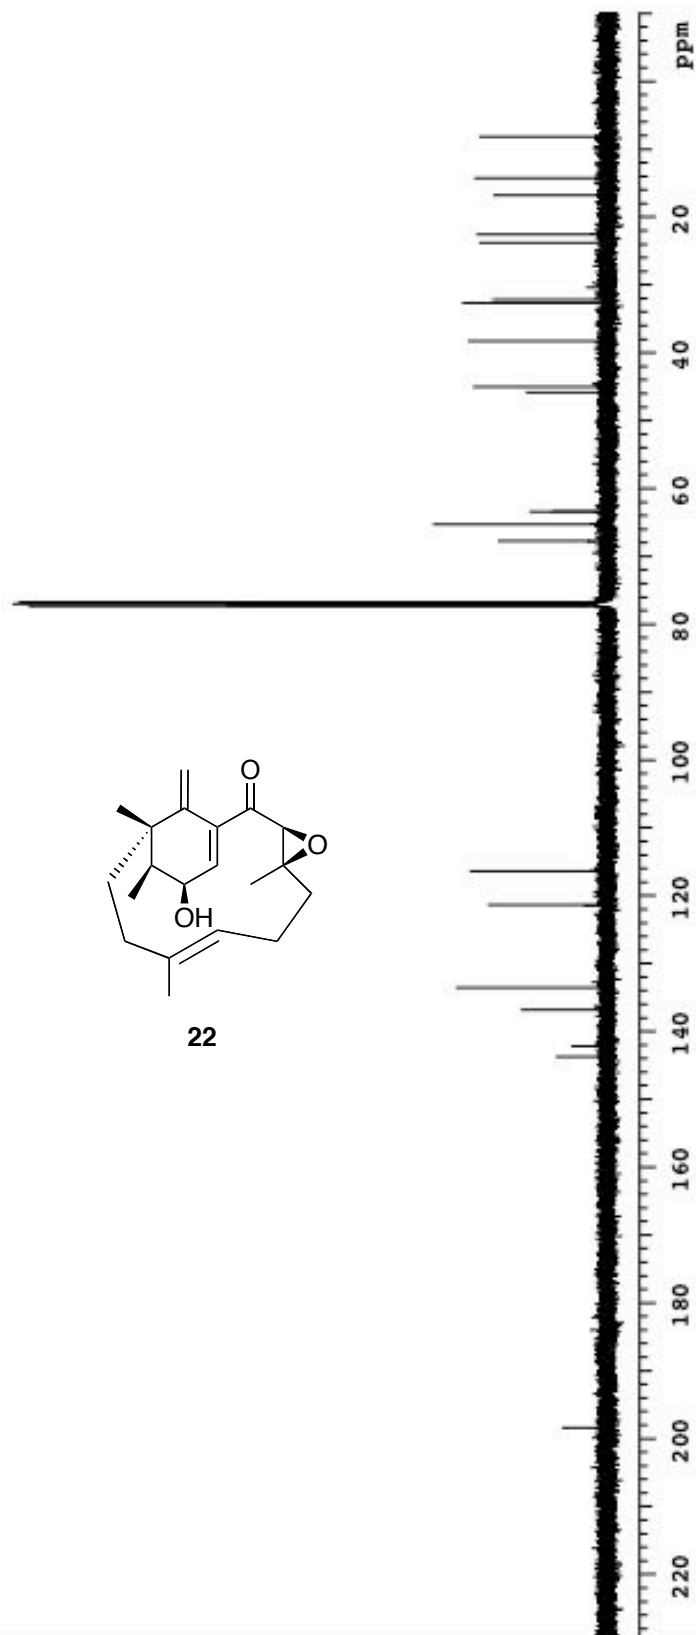

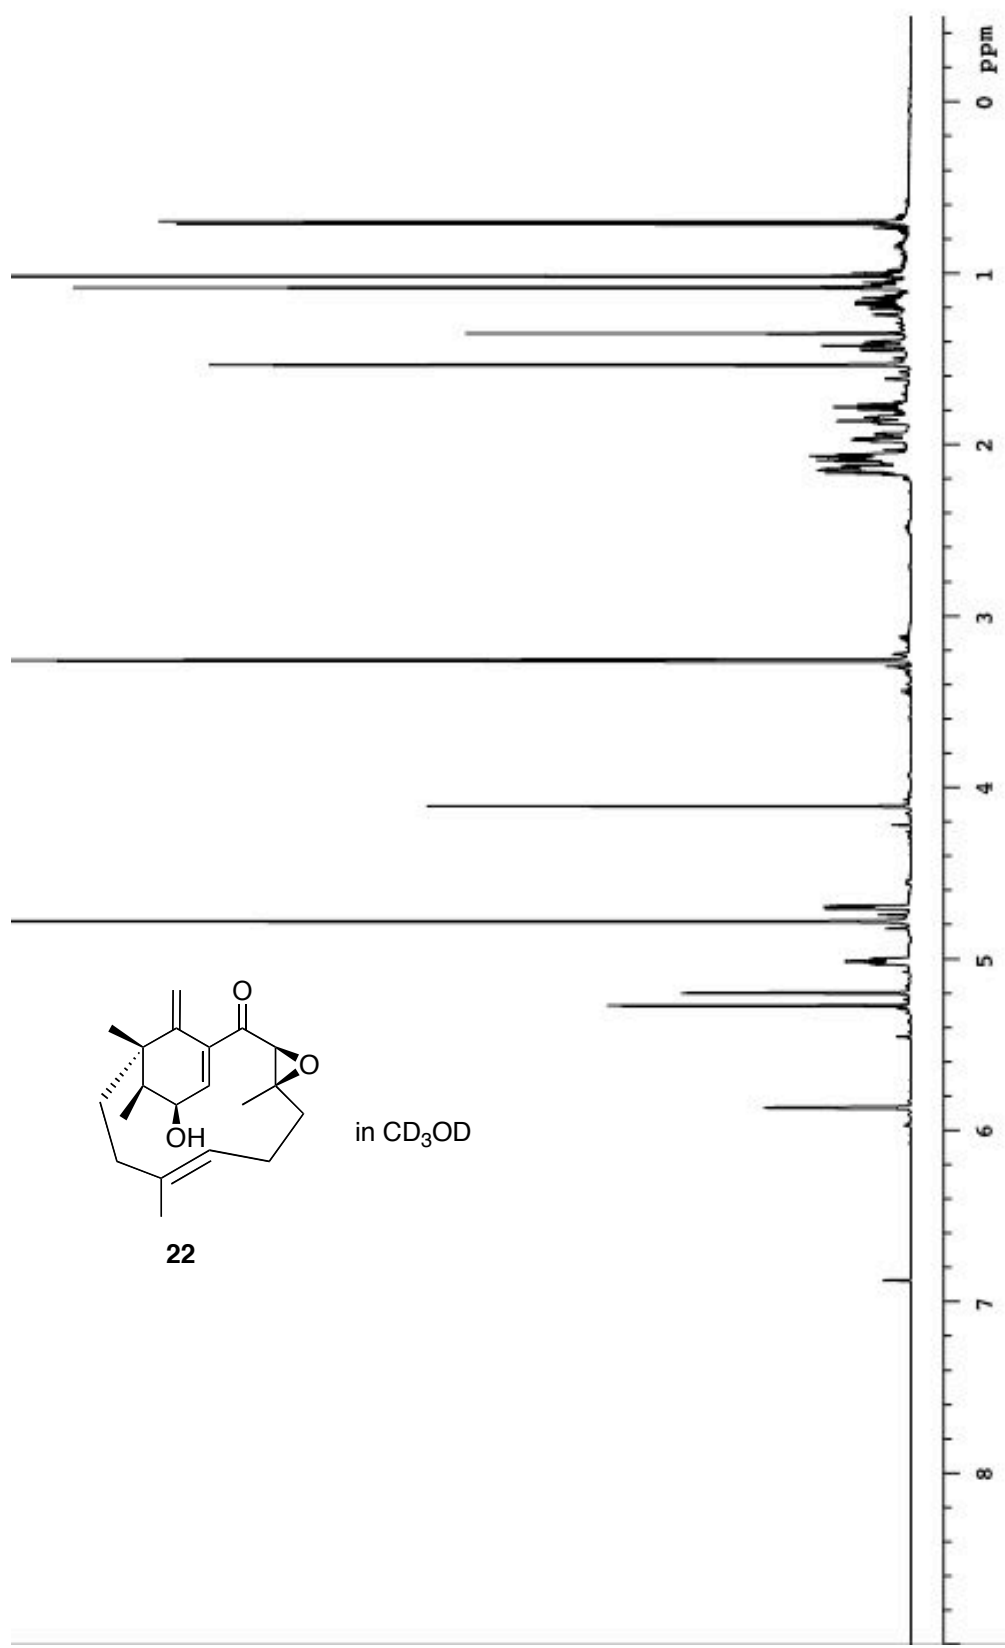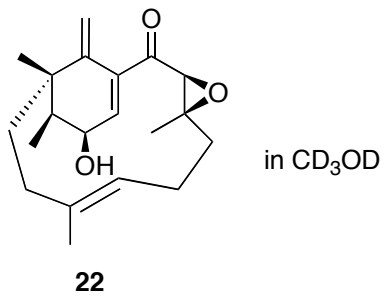

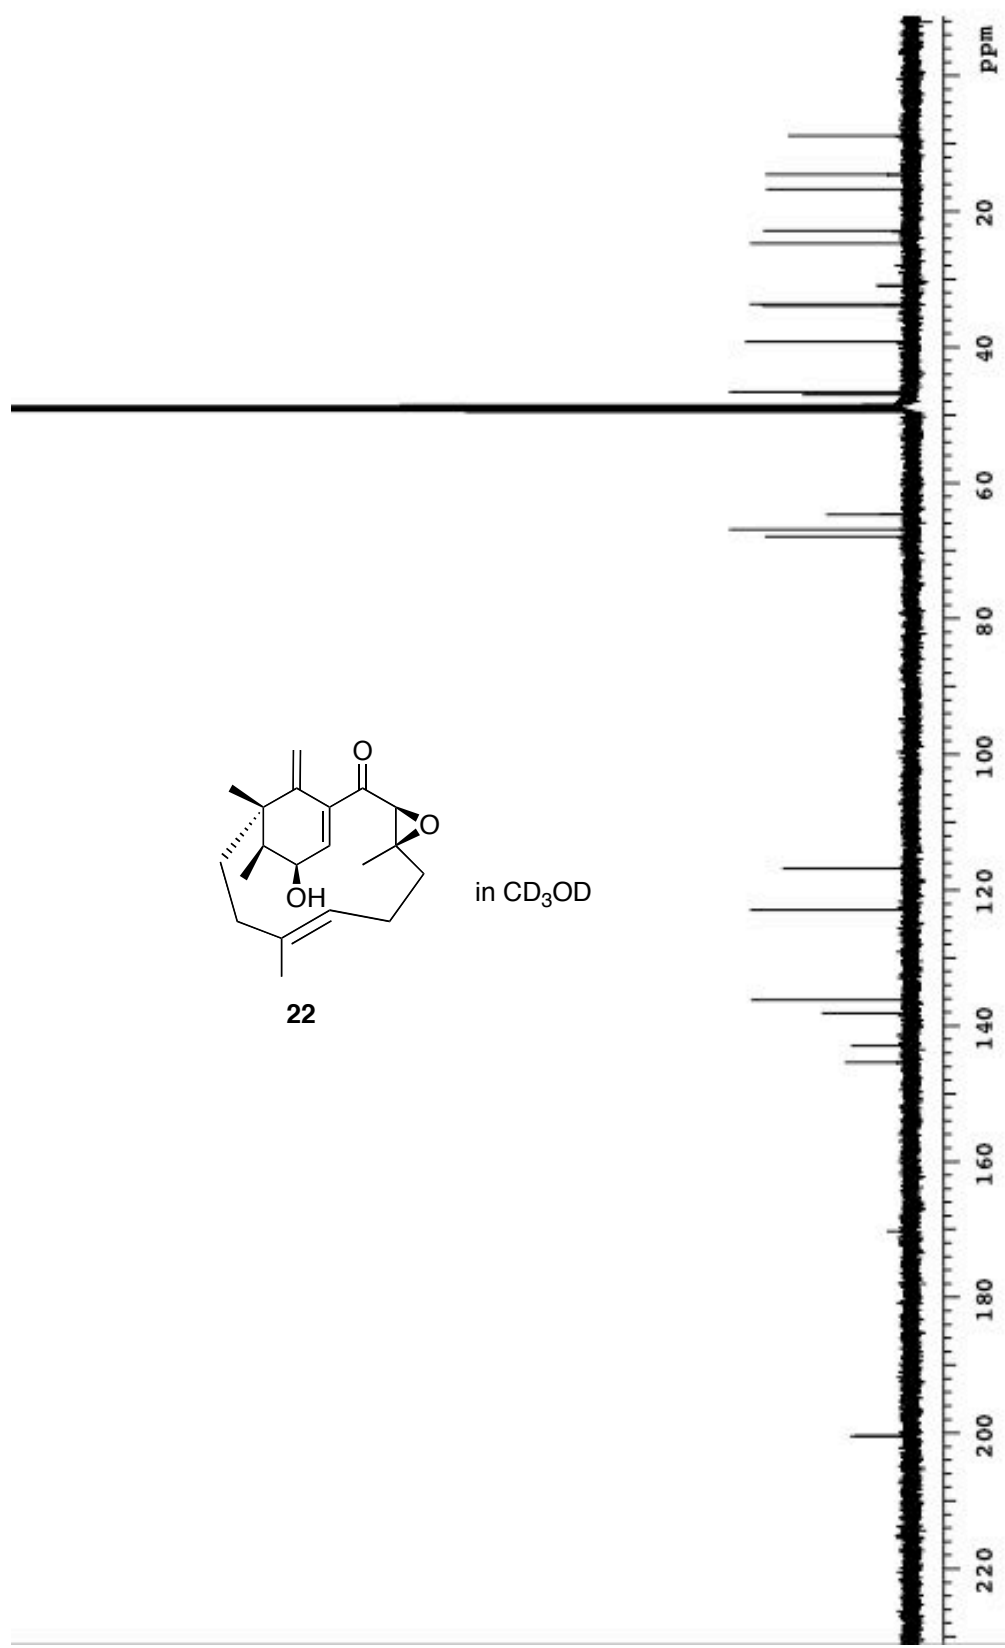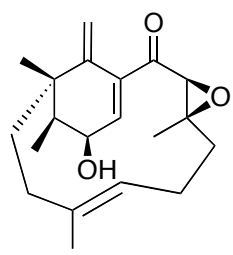

22

in CD<sub>3</sub>OD

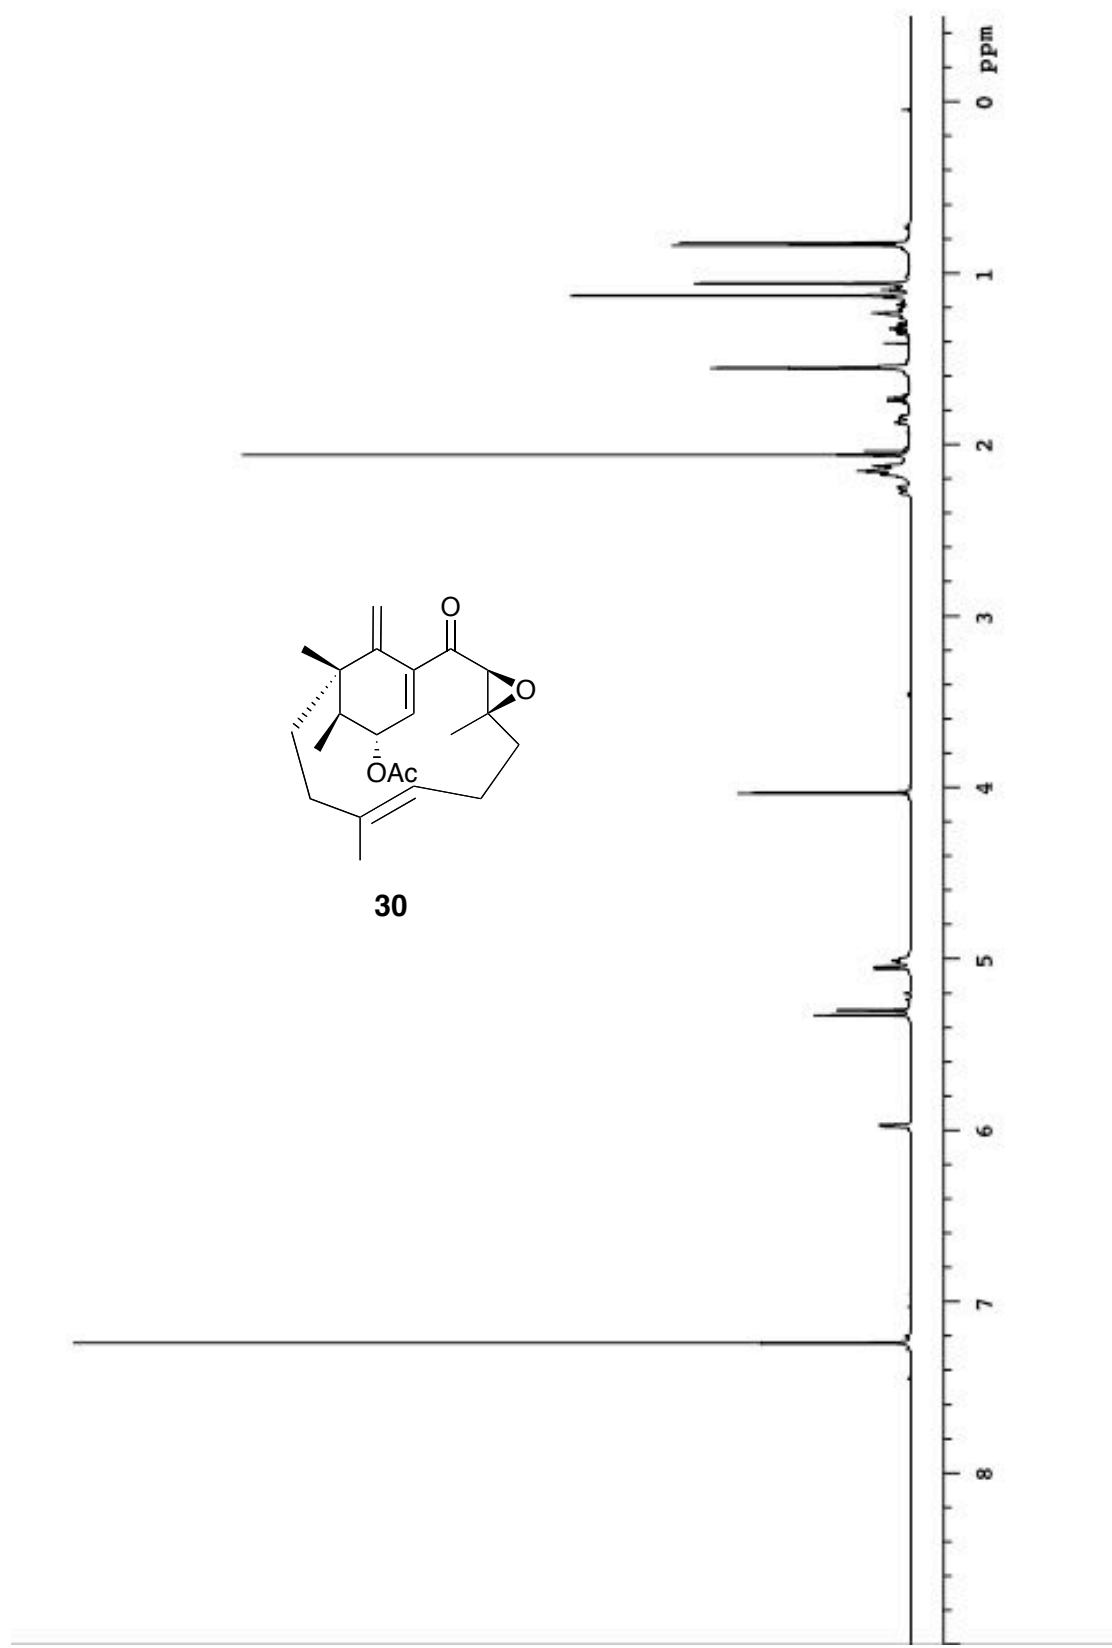

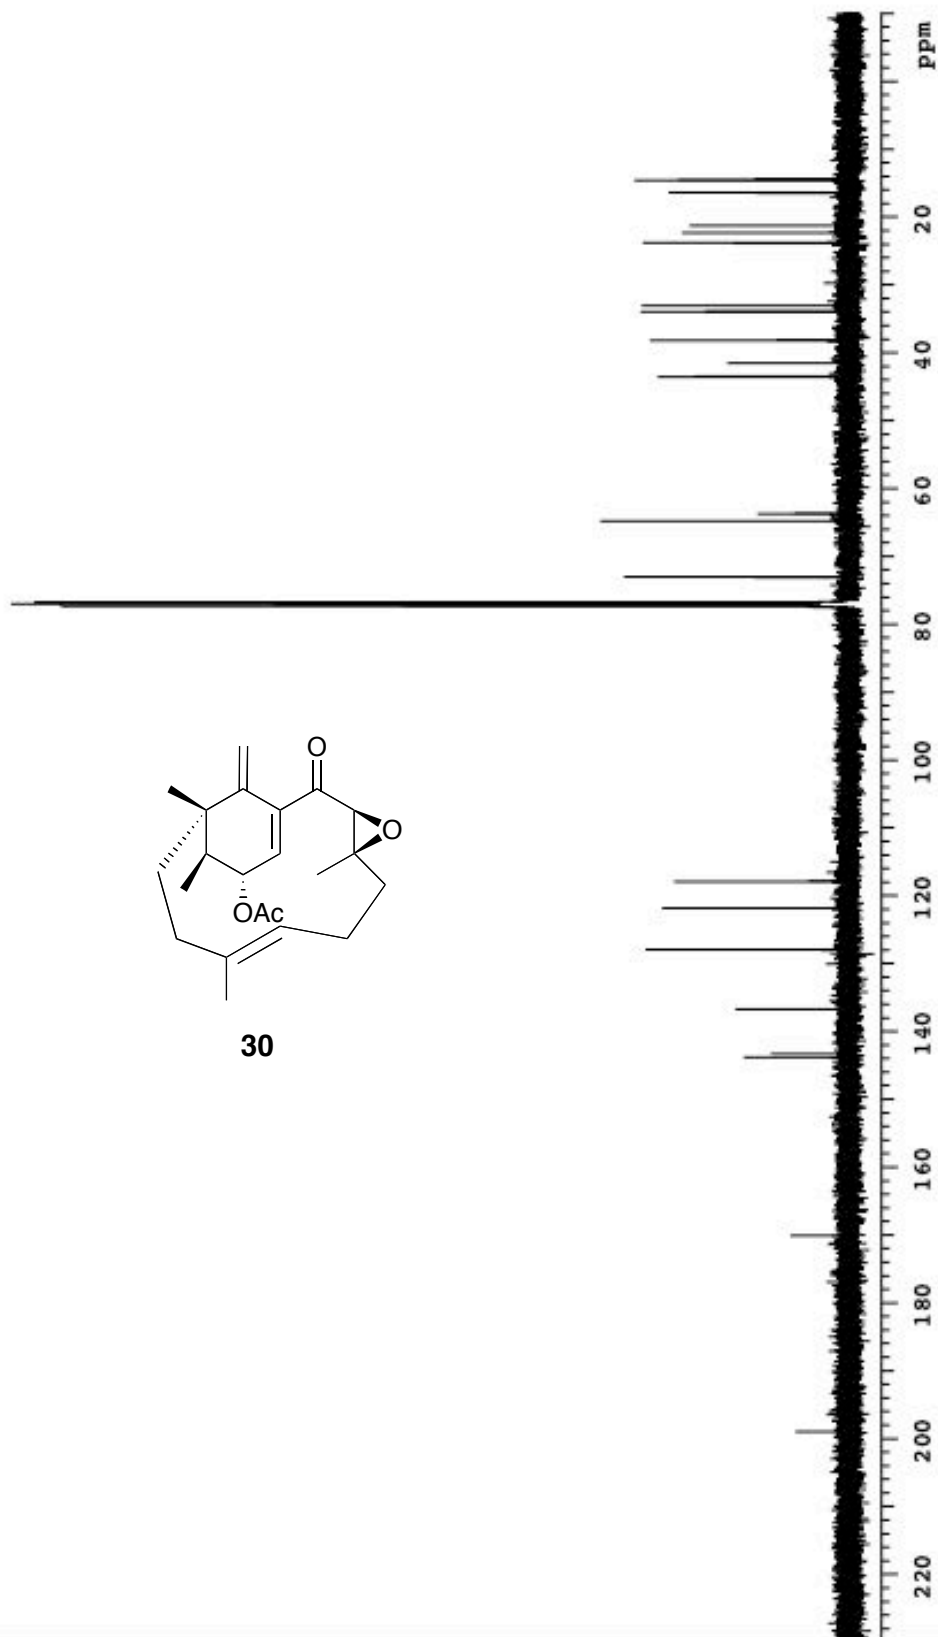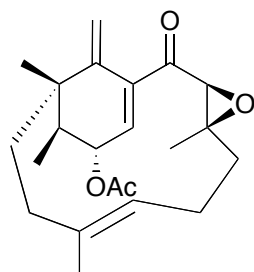

30

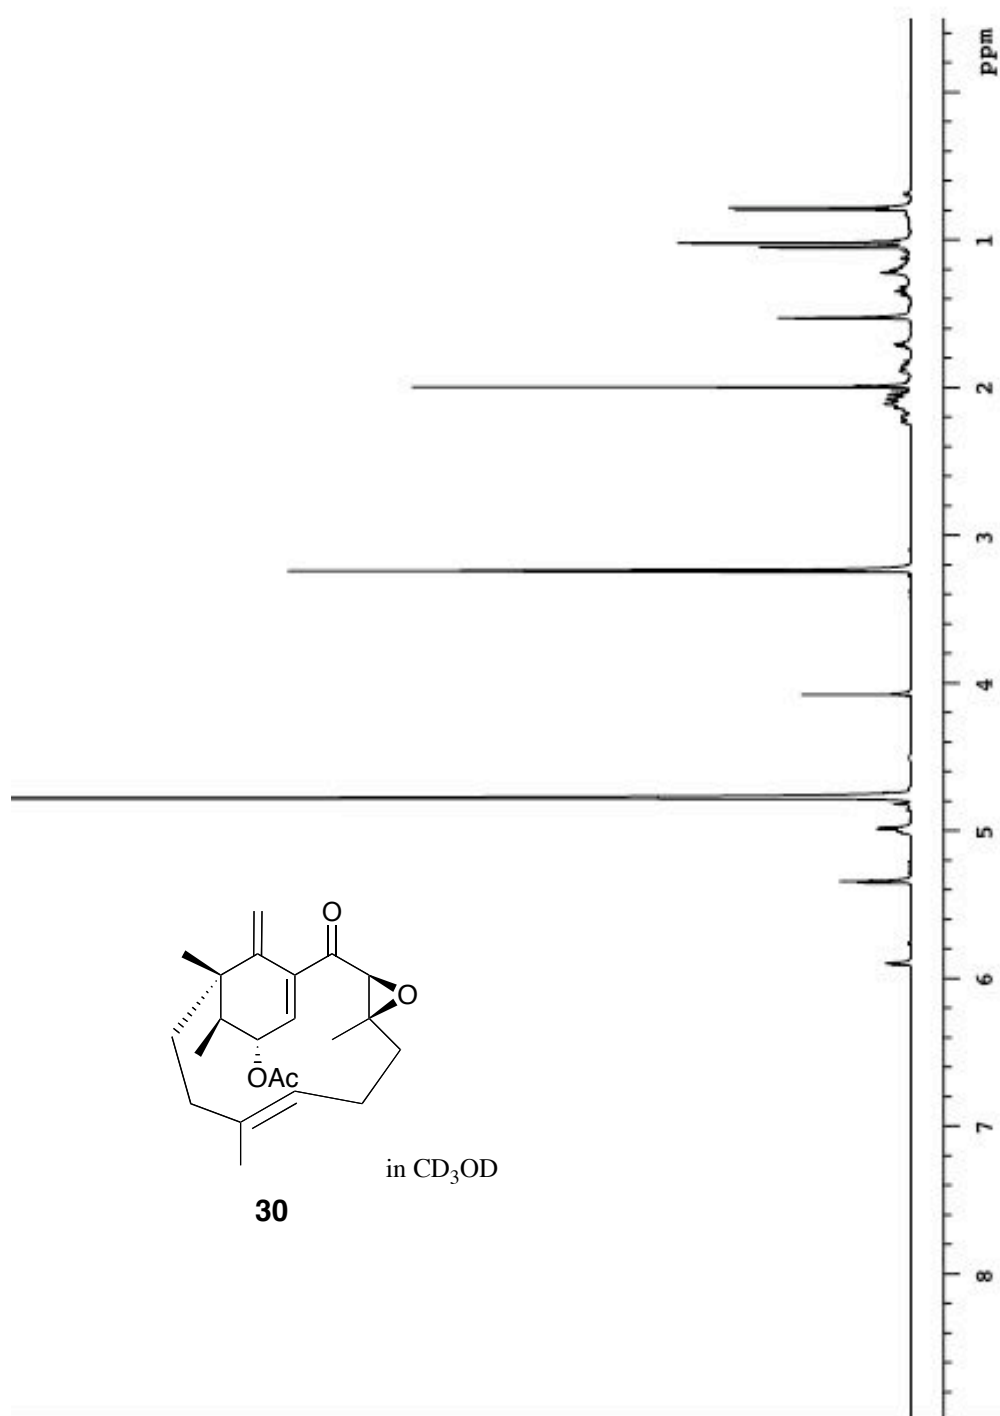



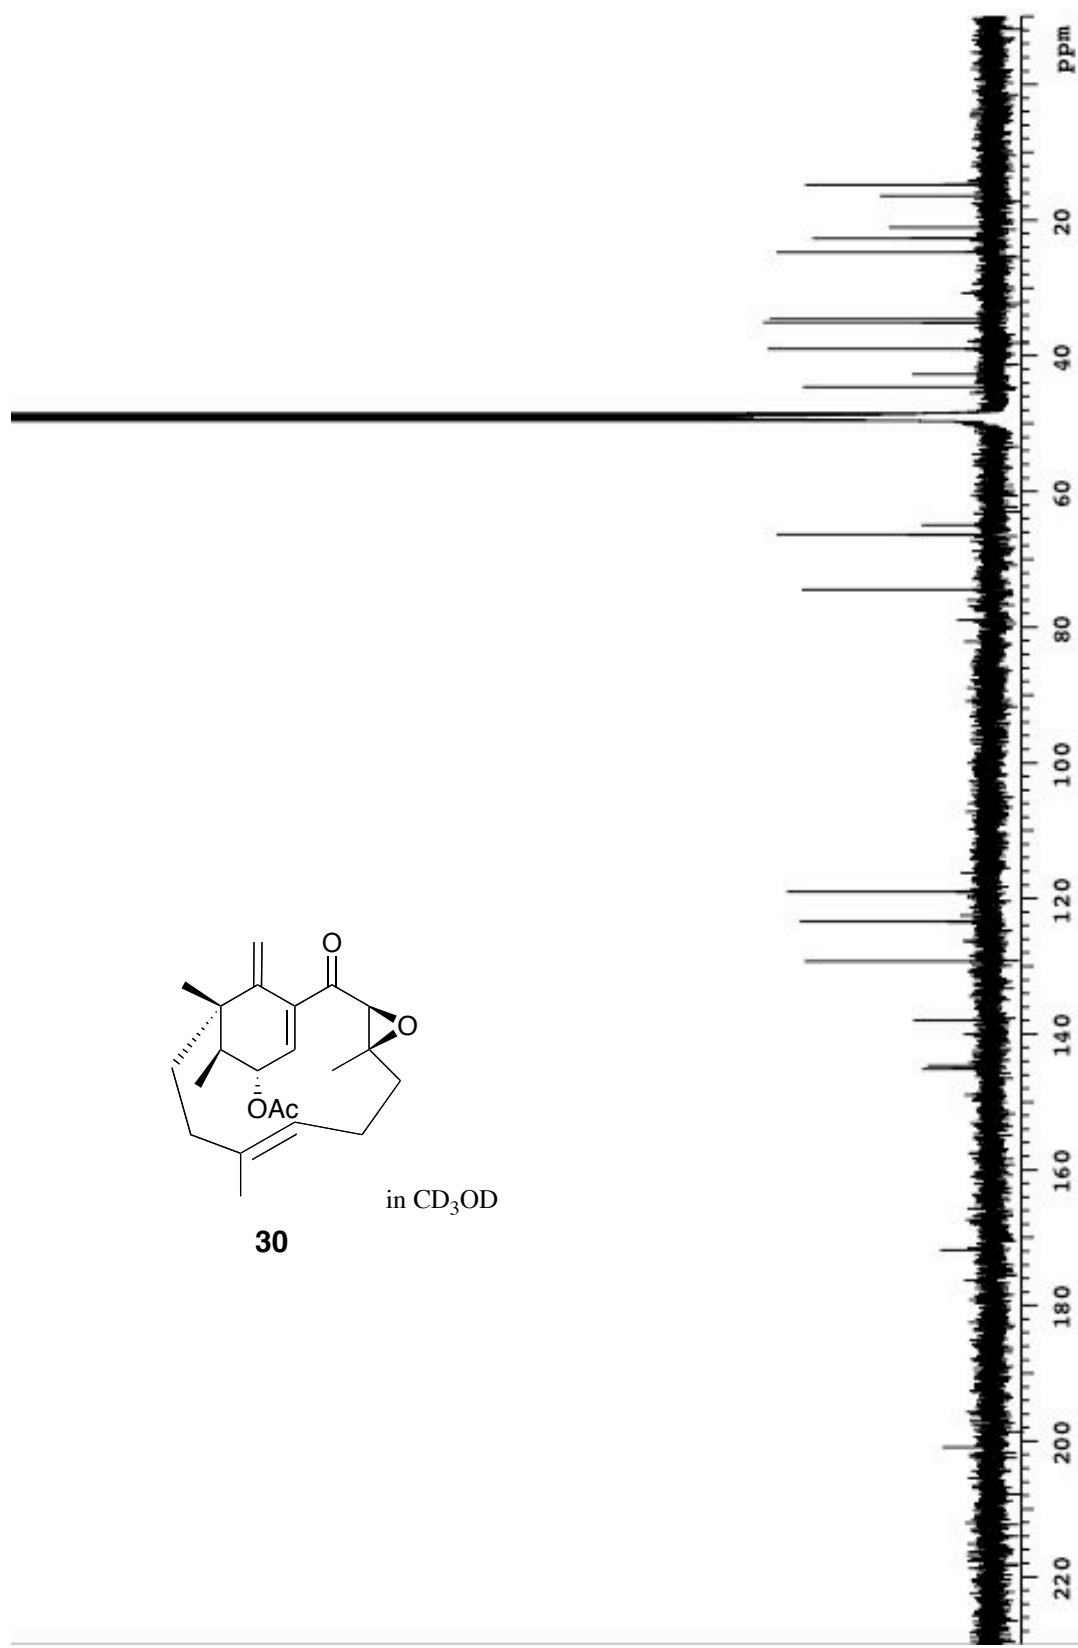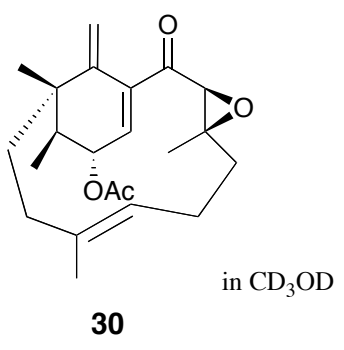

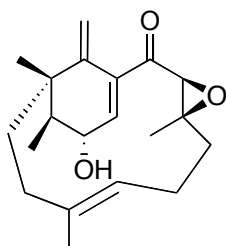

1

Phomactin B2

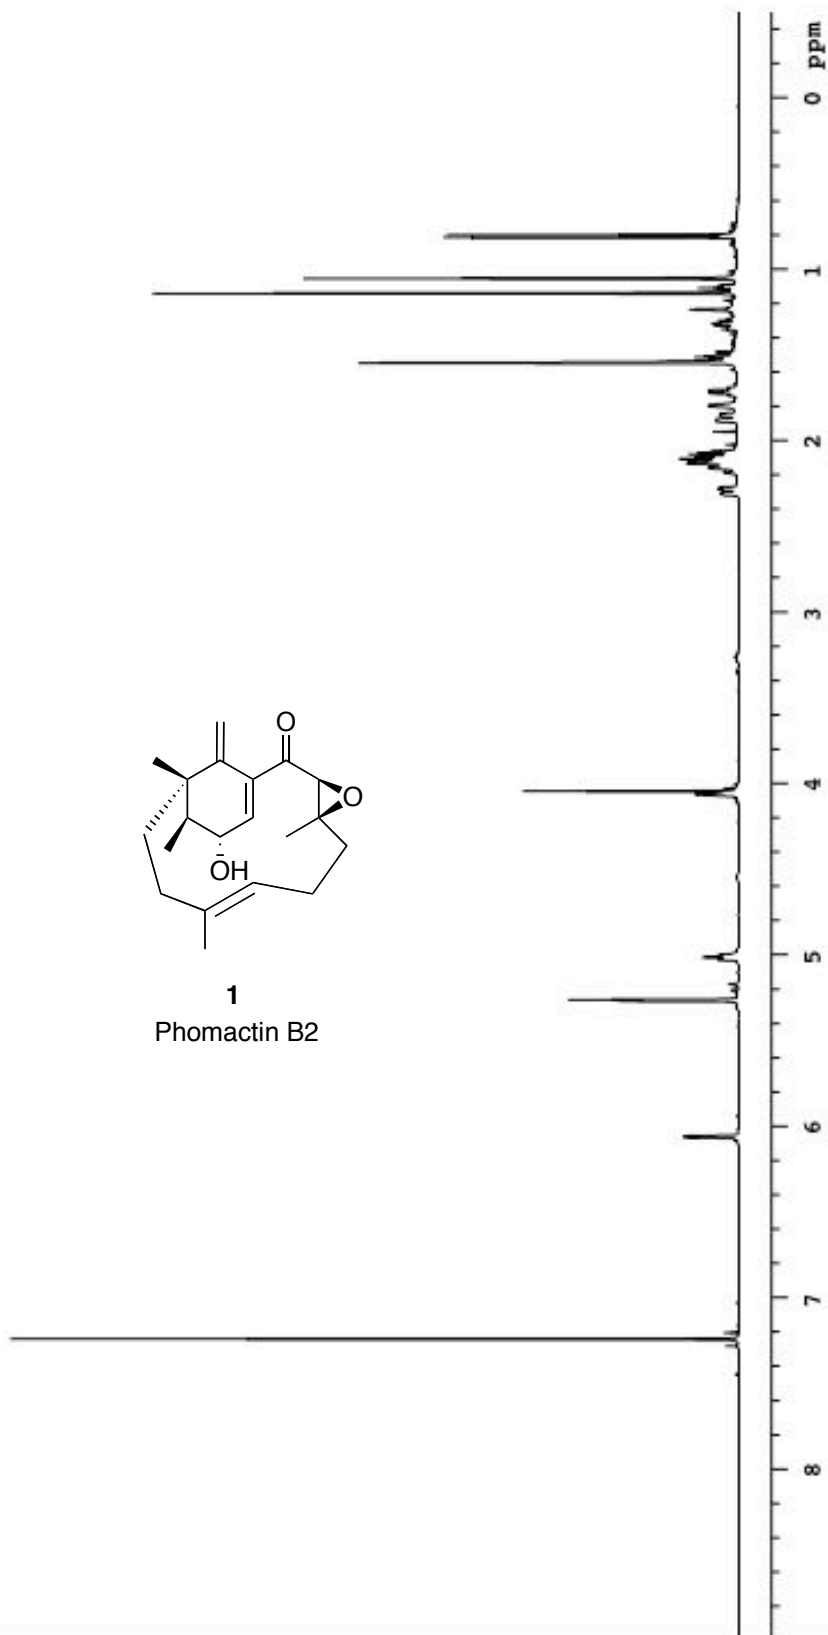

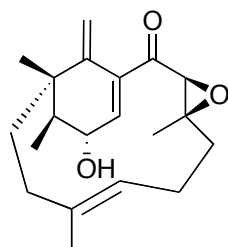

**1**  
Phomactin B2

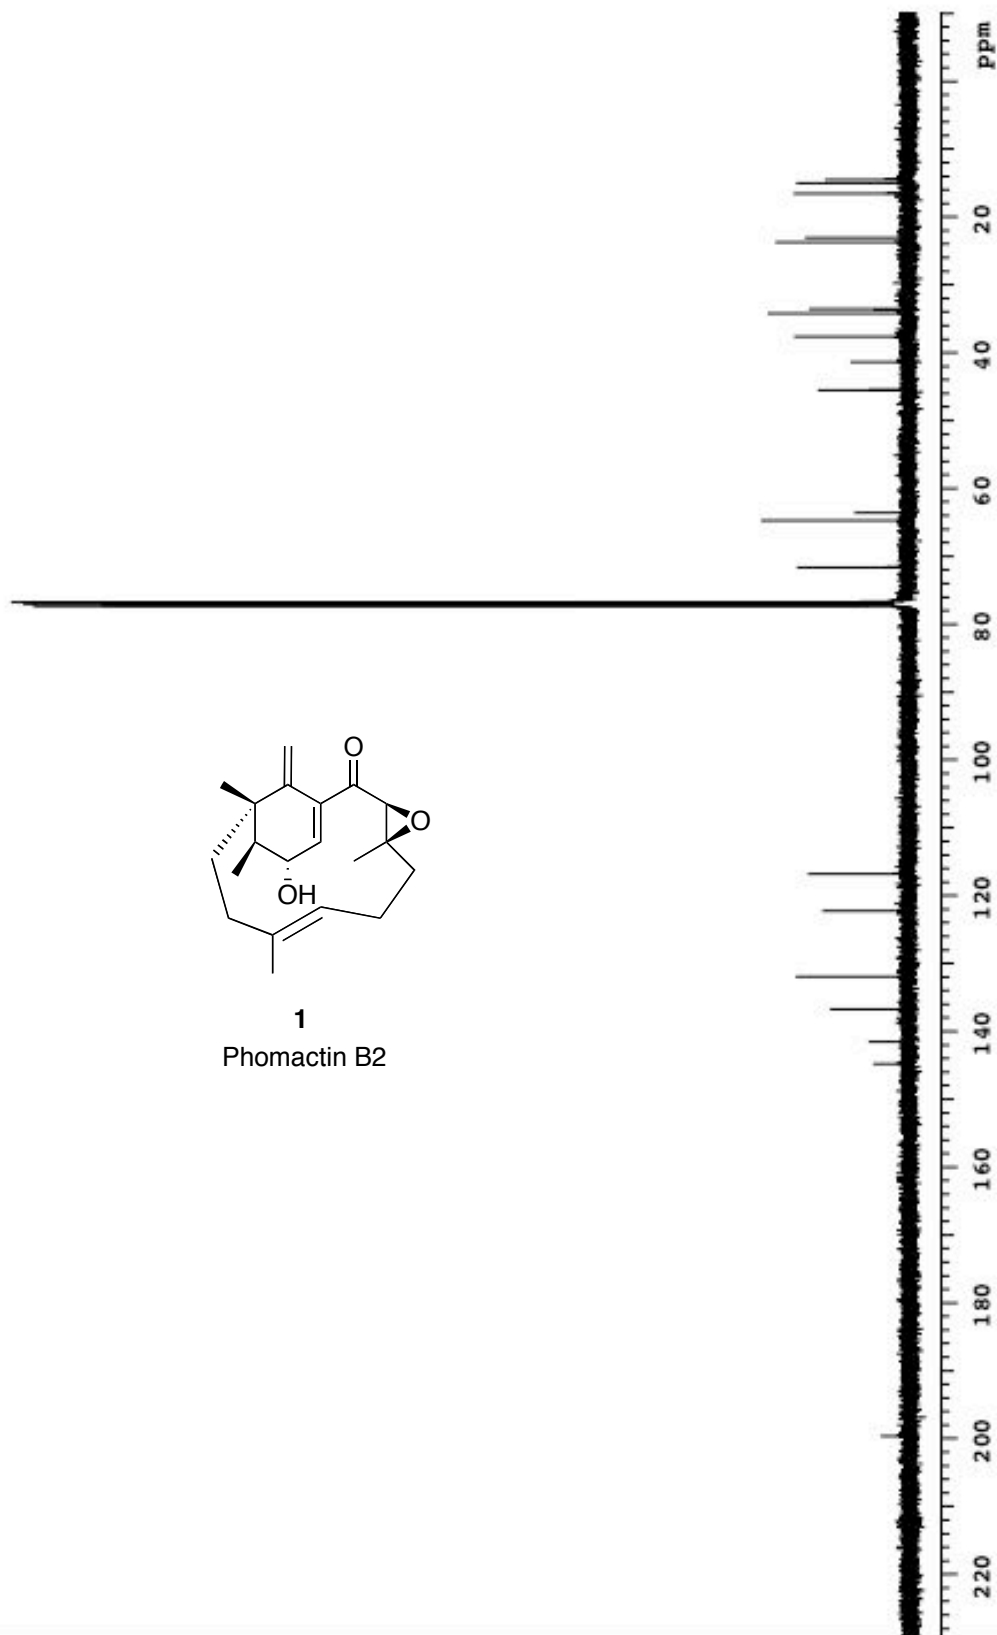

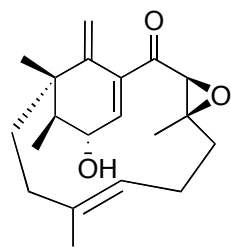

**1**

Phomactin B2

in CD<sub>3</sub>OD

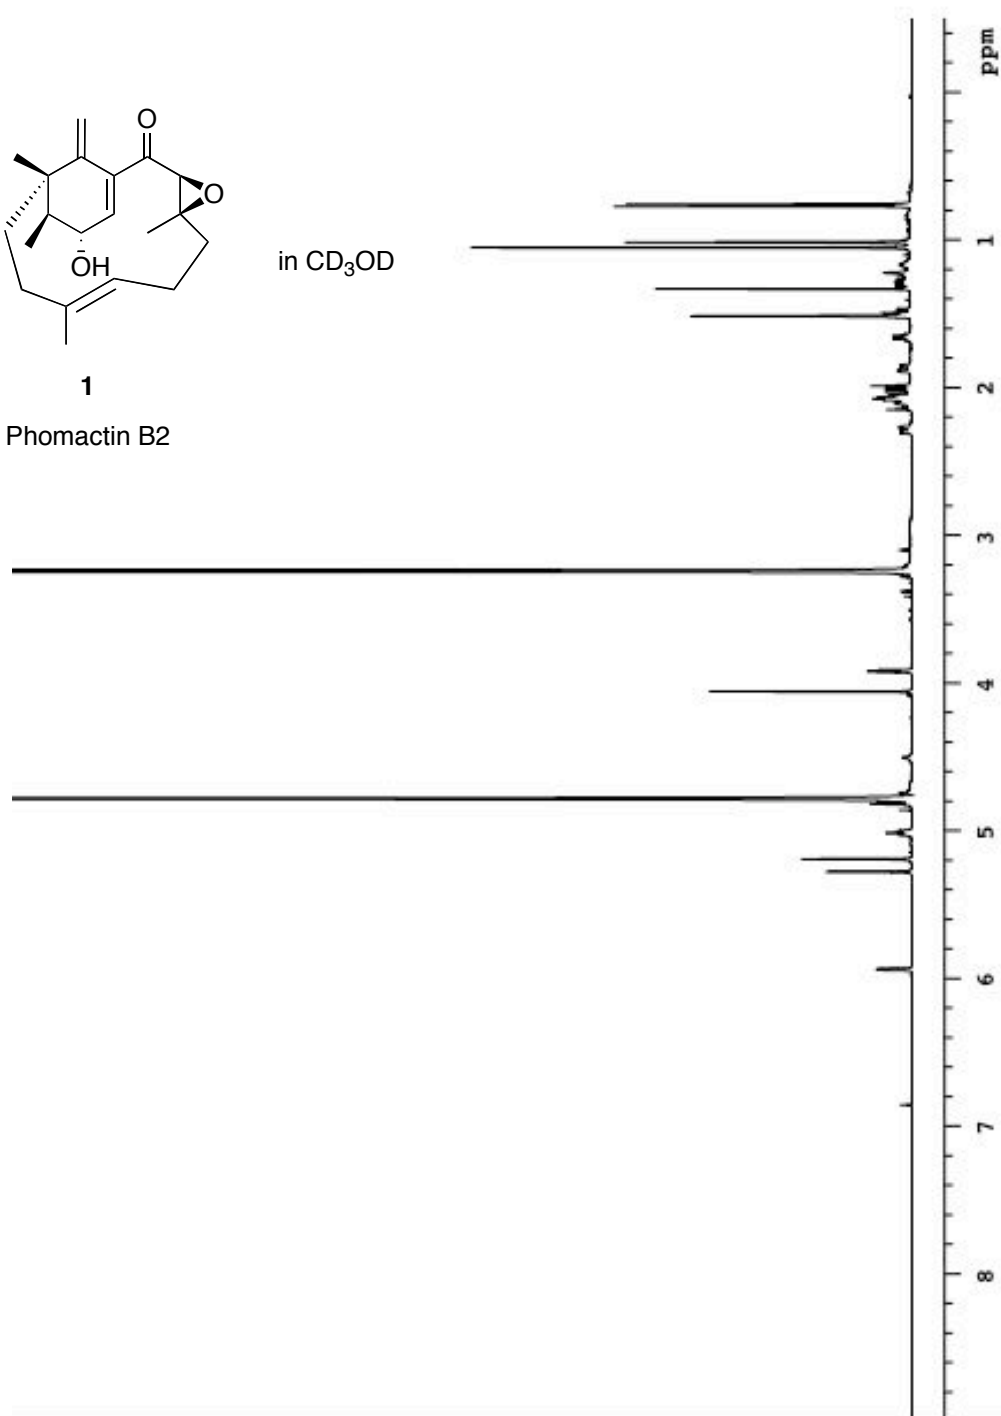

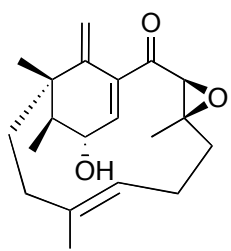

**1**

Phomactin B2

in CD<sub>3</sub>OD

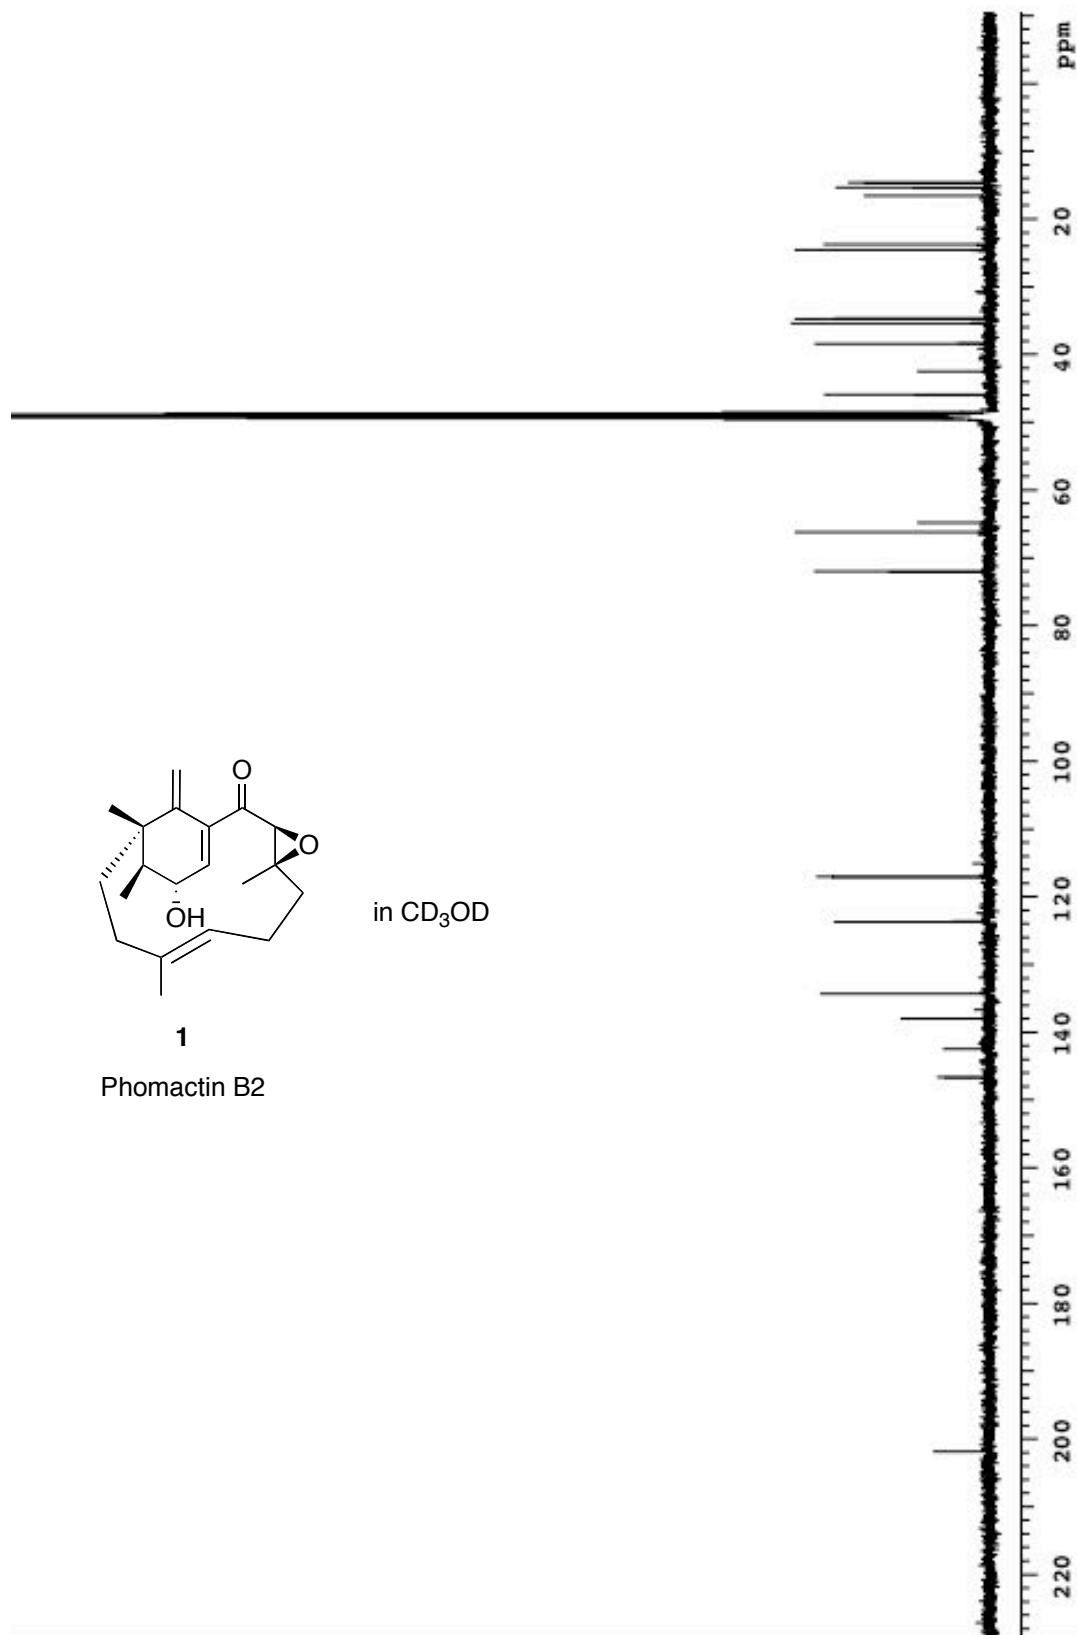

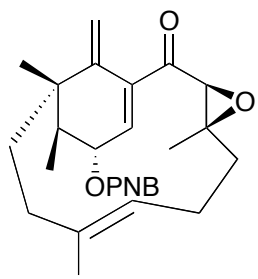

31

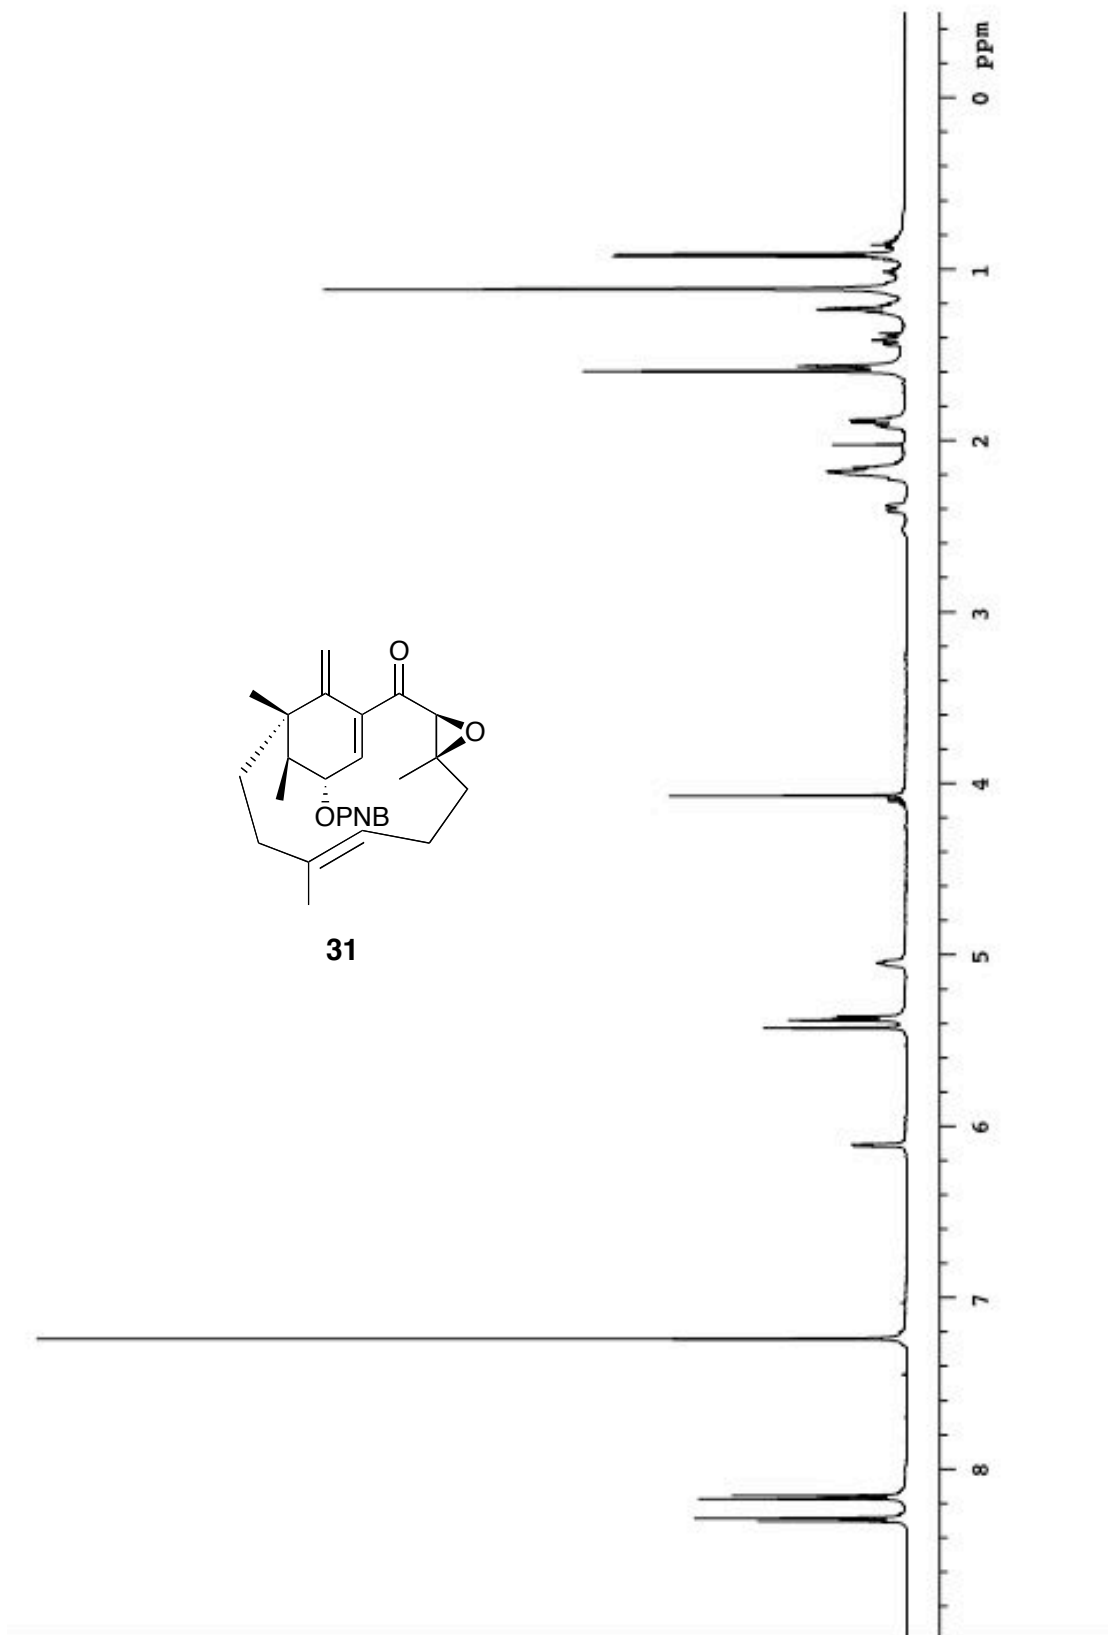

Supplement: NIHMS63534-supplement-3si20070812_07.pdf [file NIHMS63534-supplement-3si20070812_07.pdf]
