# Supplementary material
Source: PubMed Central journal article supplement (PMC2535905)
Supplement: NIHMS63534-supplement-4si20070812_07.pdf [file NIHMS63534-supplement-4si20070812_07.pdf]

**Total Synthesis of ( $\pm$ )-Phomactin B2 via an Intramolecular Cyclohexadienone  
Annulation of a Chromium Carbene Complex.**

Jie Huang, Chunrui Wu and William D. Wulff\*

Department of Chemistry, Michigan State University, East Lansing MI 48824

## Supporting information

### Table of Contents

|                                                                                     |     |
|-------------------------------------------------------------------------------------|-----|
| Preparation of <b>23</b> .                                                          | S3  |
| Preparation of Alcohol <b>11</b> .                                                  | S3  |
| Preparation of Trienol <b>12</b> .                                                  | S4  |
| Preparation of Trienal <b>24</b> .                                                  | S4  |
| Preparation of Trienynol <b>13</b> .                                                | S5  |
| Preparation of TIPS ether <b>14a</b> .                                              | S5  |
| Preparation of Carbene Complex <b>3a</b> .                                          | S6  |
| Preparation of MOM ether <b>14b</b> .                                               | S6  |
| Preparation of Carbene Complex <b>3b</b> .                                          | S7  |
| Thermolysis of Carbene Complex <b>3a</b> .                                          | S7  |
| Thermolysis of Carbene Complex <b>3b</b> .                                          | S8  |
| Preparation of Alcohol <b>2c</b> .                                                  | S9  |
| Preparation of MOM ether <b>2b</b> .                                                | S10 |
| Preparation of Dienone <b>16</b> .                                                  | S10 |
| Methylation of Dienone <b>16</b> .                                                  | S11 |
| Cleavage of MOM group in <b>25</b> .                                                | S11 |
| Preparation of TIPS ether <b>27</b> .                                               | S12 |
| Reduction and Acetylation of Dienone <b>27</b> .                                    | S12 |
| Preparation of Alcohols <b>18</b> and <b>19</b> .                                   | S13 |
| Epoxidation of Allylic Alcohol <b>18</b> .                                          | S14 |
| Epoxidation of Allylic Alcohol <b>19</b> .                                          | S14 |
| Oxidation of Epoxy Alcohol <b>21</b> .                                              | S15 |
| Oxidation of Epoxy Alcohol <b>20</b> .                                              | S16 |
| Cleavage of Acetate <b>29</b> .                                                     | S16 |
| Cleavage of Acetate <b>30</b> and the Synthesis of Phomactin B2                     | S17 |
| Mitsunobu Inversion of Alcohol <b>22</b> .                                          | S18 |
| Cleavage of PNB ester <b>31</b> .                                                   | S18 |
| Table 1. <sup>13</sup> C NMR Chemical Shifts of Phomactin B2 and Compound <b>30</b> | S19 |
| References                                                                          | S19 |
| Appendix A: Crystal Structure of the Major Alcohol <b>2c</b> .                      | S20 |
| Appendix B: Crystal Structure of the Minor TIPS ether <b>15a</b> .                  | S29 |

Preparation of (2*E*,6*E*)-3, 7-dimethyl-11-(trimethylsilyl)undeca-2,6-dien-10-yn-1-ol **23**.

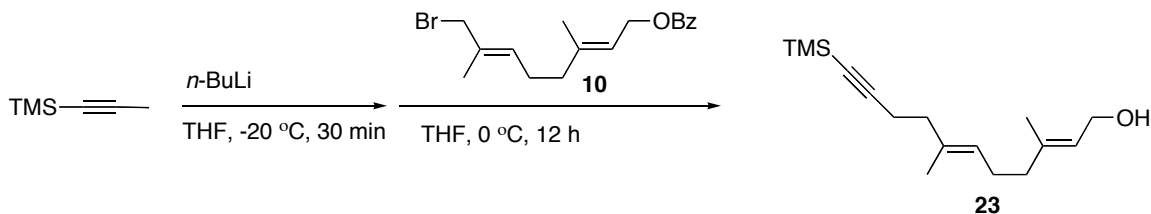

To a solution of TMS propyne (26 mL, 175 mmol) in THF (100 mL) at -20 °C was added *n*-BuLi (2.5 M, 70.0 mL, 175 mmol) dropwise. After 30 minutes, the bromide **10** (14.73 g, 43.7 mmol) in THF (50 mL) was transferred by cannulated to the above solution and the temperature was raised to 0 °C slowly. The reaction mixture was stirred for 12 hours at 0 °C and then quenched with H<sub>2</sub>O. The aqueous layer was separated and extracted with Et<sub>2</sub>O (2 \* 50 mL). The combined organic layer was washed with saturated aqueous NaHCO<sub>3</sub> (3 \* 30 mL), brine (30 mL) and dried over MgSO<sub>4</sub>. Concentration followed by flash chromatography on silica gel with a 4:1 mixture of hexanes/EtOAc as eluent provided the title compound **23** which was not further purified but taken on directly in the next step. A sample can be further purified for characterization. <sup>1</sup>HNMR (CDCl<sub>3</sub>, 300 MHz) δ 0.07 (s, 9H), 1.58 (s, 3H), 1.66 (s, 3H), 2.02-2.28 (m, 8H), 4.12-4.14 (d, 2H, *J* = 6.6 Hz), 5.14 (t, 1H, *J* = 6.6 Hz), 5.39 (t, 1H, *J* = 6.6 Hz); <sup>13</sup>C NMR (CDCl<sub>3</sub>, 75 MHz) δ 0.09, 15.80, 16.22, 19.17, 26.18, 38.52, 39.37, 59.36, 84.55, 107.18, 123.33, 125.04, 133.75, 139.61; IR (neat) 3360br, 2925, 2176, 1250, 1003, 814s, 760 cm<sup>-1</sup>; MS (EI) *m/z* (% rel intensity): 264 M<sup>+</sup> (0.03), 249 (1.30), 159 (31), 149 (30), 135 (21), 119 (21), 105 (21), 96 (47), 83 (32), 81 (32), 75 (49), 73 (100), 59 (68). Anal calcd for C<sub>16</sub>H<sub>28</sub>OSi: C, 72.66; H, 10.67. Found: C, 72.83; H, 10.39. Colorless oil; R<sub>f</sub> = 0.35 (3:1 hexanes/EtOAc).

Preparation of (2*E*,6*E*)-3,7-dimethylundeca-2,6-dien-10-yn-1-ol **11**.

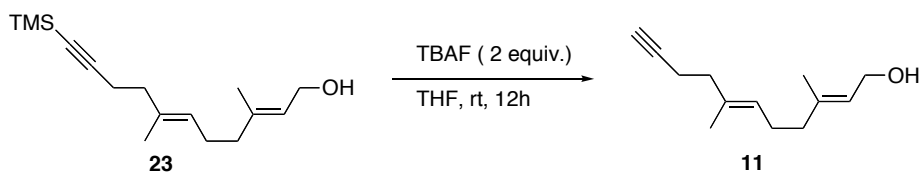

The trimethylsilyl protected acetylene **23** prepared by the previous procedure was treated with TBAF (1.0 M in THF, 100 mL) at room temperature for 12 hours followed by quenching with saturated aqueous NaHCO<sub>3</sub>. The aqueous layer was separated and extracted with Et<sub>2</sub>O (2 \* 50 mL). The combined organic layer was washed with saturated aqueous NaHCO<sub>3</sub> (3 \* 30 mL), brine (30 mL) and dried over MgSO<sub>4</sub>. Concentration followed by Flash chromatography on silica gel with a 4:1 mixture of hexanes/EtOAc as eluent provided the desired product **11** as a colorless oil (6.09 g, 0.0317 mmol, 71% 2 steps). <sup>1</sup>HNMR (CDCl<sub>3</sub>, 300 MHz) δ 1.59 (s, 3H), 1.65 (s, 3H), 1.93 (t, 1H, *J* = 2.4 Hz), 2.00-2.29 (m, 8H), 4.12-4.14 (d, 2H, *J* = 6.9 Hz), 5.16 (t, 1H, *J* = 6.3 Hz), 5.40 (t, 1H, *J* = 6.6 Hz); <sup>13</sup>CNMR (CDCl<sub>3</sub>, 75 MHz) δ 15.79, 16.25, 17.56, 26.19, 38.21, 39.34, 59.39, 68.36, 84.37, 123.50, 125.13, 133.55, 139.53; IR (neat) 3350br, 3304, 2922, 2857, 2118, 1725, 1668, 1445, 1383 cm<sup>-1</sup>; MS (EI) *m/z* (% rel intensity): 191 (M-1)<sup>+</sup> (0.02), 177 (1), 173 (0.23), 161 (3), 159 (6), 105 (43), 91 (100), 79 (76). Anal calcd for C<sub>13</sub>H<sub>20</sub>O: C, 81.20; H, 10.48. Found: C, 81.36; H, 10.38. Colorless oil; R<sub>f</sub> = 0.29 (3:1 hexanes/EtOAc).

### Preparation of (2*E*,6*E*,10*E*)-11-iodo-3,7,10-trimethylundeca-2,6,10-trien-1-ol **12**.

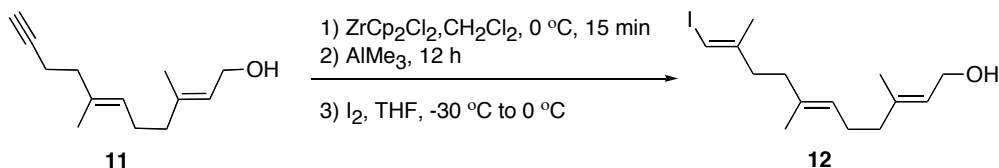

To a solution of zirconocene dichloride (1.25 g, 4.28 mmol) in  $\text{CH}_2\text{Cl}_2$  (34 mL) at room temperature under an argon atmosphere, was added dropwise a solution of trimethylaluminum in pentane (2 M in pentane, 25.7 mL, 51.4 mmol). After 15 minutes, the solution was cooled to  $0\text{ }^\circ\text{C}$ , and a solution of alkyne **11** (3.25 g, 17.1 mmol) dissolved in  $\text{CH}_2\text{Cl}_2$  (34 mL) was added to the above lemon yellow solution. The reaction mixture was stirred at  $0\text{ }^\circ\text{C}$  for 12 hours and then cooled to  $-30\text{ }^\circ\text{C}$ . Iodine (8.69 g, 34.2 mmol) was added as a solution in 20 mL of THF. The resulting brown slurry was raised to  $0\text{ }^\circ\text{C}$  and poured slowly with stirring into an iced saturated aqueous  $\text{NaHCO}_3$ . The aqueous layer was extracted with  $\text{Et}_2\text{O}$  (3 \* 50 mL). The combined organic layer was washed with saturated aqueous  $\text{NaHCO}_3$  and dried over  $\text{MgSO}_4$ . Concentration followed by flash chromatography on silica gel with 4:1 hexanes/ $\text{EtOAc}$  as eluent provided the desired product **12** as a colorless oil (3.69 g, 11 mmol, 65%).  $^1\text{H NMR}$  ( $\text{CDCl}_3$ , 300 MHz)  $\delta$  1.57 (s, 3 H), 1.66 (s, 3 H), 1.80 (s, 3 H), 1.97-2.10 (m, 6 H), 2.27 (t, 2H,  $J = 6.6\text{ Hz}$ ), 4.13 (d, 2H,  $J = 6.9\text{ Hz}$ ), 5.08 (t, 1H,  $J = 6.9\text{ Hz}$ ), 5.39 (t, 1H,  $J = 6.9\text{ Hz}$ ), 5.83 (s, 1 H);  $^{13}\text{C NMR}$  ( $\text{CDCl}_3$ , 75 MHz)  $\delta$  15.82, 26.26, 23.85, 26.17, 37.84, 38.21, 39.41, 59.39, 74.66, 123.41, 124.70, 134.21, 139.60, 147.82; IR (neat) 3312br, 2919, 2858, 1441  $\text{cm}^{-1}$ ; MS (EI)  $m/z$  (% rel intensity): 239 (3), 207 ( $\text{M}-127$ )<sup>+</sup> (2), 189 (11), 181 (44), 121 (80), 107 (98), 93 (100), 53 (73). Anal calcd for  $\text{C}_{14}\text{H}_{23}\text{OI}$ : C, 50.31; H, 6.94. Found: C, 50.64; H, 6.90. Colorless oil;  $R_f = 0.30$  (3:1 hexanes/ $\text{EtOAc}$ ).

### Preparation of (2*E*,6*E*,10*E*)-11-iodo-3,7,10-trimethylundeca-2,6,10-trienal **24**.

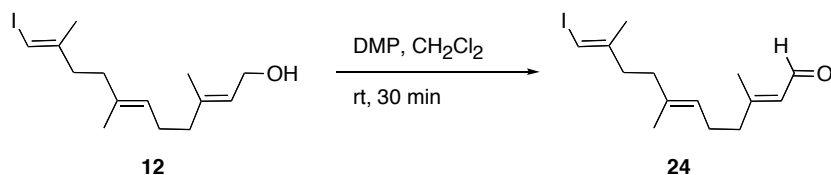

To a solution of allylic alcohol **12** (0.80 g, 2.4 mmol) in  $\text{CH}_2\text{Cl}_2$  (10 mL) was added freshly prepared DMP<sup>1</sup> (1.10 g, 2.6 mmol) as powder. The reaction mixture was stirred at room temperature for 30 minutes before quenching with 10% aqueous  $\text{NaOH}$  (10 mL). The stirring was continued for another 5 minutes, and then  $\text{Et}_2\text{O}$  (3 \* 10 mL) was added to extract the product from the reaction mixture. The combined organic layer was dried over  $\text{MgSO}_4$ . Removal of the solvent under reduced pressure followed by flash chromatography on a silica gel column (9:1 hexanes/ $\text{EtOAc}$  as eluent) provided the desired aldehyde **24** as a colorless oil (0.784 g, 2.36 mmol, 98%).  $^1\text{H NMR}$  ( $\text{CDCl}_3$ , 300 MHz)  $\delta$  1.58 (s, 3H), 1.80 (s, 3H), 2.15 (s, 3H), 2.05-2.29 (m, 8H), 5.02-5.08 (m, 1H), 5.83-5.86 (m, 1H), 5.83 (s, 1H), 9.97 (d, 1H,  $J = 7.8\text{ Hz}$ );  $^{13}\text{C NMR}$  ( $\text{CDCl}_3$ , 75 MHz)  $\delta$  15.89, 17.61, 23.83, 25.57, 37.77, 38.13, 40.50, 74.79, 123.45, 127.46, 135.43, 147.63, 163.47, 191.22. IR (neat) 2939m, 2853m, 2772w, 1684s, 1437m, 1194m, 1122m, 827w, 667w  $\text{cm}^{-1}$ ; MS (EI)  $m/z$  (% rel intensity): 332  $\text{M}^+$  (3), 205 (22), 187 (34), 181 (77), 177 (33), 161 (17), 159 (16), 149 (16), 145 (24), 135 (16), 133 (24), 125 (20), 121 (100), 107 (76), 105 (28), 95 (67), 93 (73), 84 (30), 81 (100), 67 (63), 55 (85), 53 (86). Anal calcd for  $\text{C}_{14}\text{H}_{21}\text{OI}$ : C, 50.61; H, 6.37. Found: C, 50.28; H, 6.64. Colorless oil;  $R_f = 0.6$  (3:1 hexanes/ $\text{EtOAc}$ ).

### Preparation of (4*E*,8*E*,12*E*)-13-iodo-5,9,12-trimethyltrideca-4,8,12-trien-1-yn-3-ol **13**.

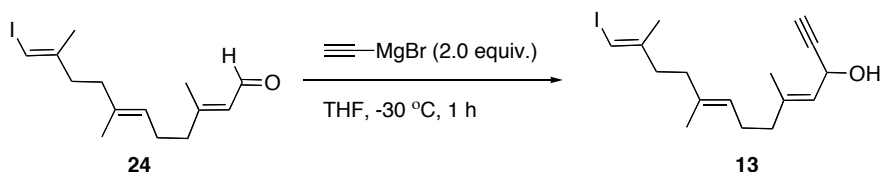

To a solution of aldehyde **24** (0.16 g, 0.48 mmol) in THF (2 mL) at  $-30\text{ }^{\circ}\text{C}$  under an argon atmosphere was added ethynyl magnesium bromide (0.5 M solution in THF, 1.92 mL, 0.96 mmol) dropwise. The reaction mixture was stirred at  $-30\text{ }^{\circ}\text{C}$  for 1 hour and quenched with saturated aqueous  $\text{NH}_4\text{Cl}$  (8 mL). The aqueous layer was extracted with  $\text{Et}_2\text{O}$  (3 \* 5 mL). The combined organic layer was washed with brine (15 mL) and dried over  $\text{MgSO}_4$ . Flash chromatography on a silica gel column using 15% EtOAc in hexanes as eluent provided the desired propargylic alcohol **13** as a colorless oil (0.16 g, 0.45 mmol, 93%).  $^1\text{H}$  NMR ( $\text{CDCl}_3$ , 500 MHz)  $\delta$  1.57 (s, 3H), 1.70 (s, 3H), 1.80 (s, 3H), 2.01-2.10 (m, 6H), 2.27 (t, 2H,  $J = 7.2$  Hz), 2.47 (d, 1H,  $J = 2.1$  Hz), 5.07-5.12 (m, 2H), 5.37 (d, 1H,  $J = 8.4$  Hz), 5.83 (s, 1H);  $^{13}\text{C}$  NMR ( $\text{CDCl}_3$ , 125 MHz)  $\delta$  15.87, 16.59, 23.86, 25.94, 37.82, 38.22, 39.13, 58.89, 72.49, 74.69, 84.44, 124.09, 124.36, 134.46, 140.77, 147.81; IR (neat) 3400 (broad), 3299, 2919, 2853, 2120 (weak), 1956, 1667  $\text{cm}^{-1}$ . HRMS (CI) calcd for  $\text{C}_{16}\text{H}_{22}\text{I}$  ( $\text{M}-\text{H}_2\text{O}+\text{H}$ ) $^+$   $m/z$  341.0766, meas 341.0771. Colorless oil;  $R_f = 0.43$  (3:1 hexanes/EtOAc).

### Preparation of ((4*E*,8*E*,12*E*)-13-iodo-5,9,12-trimethyltrideca-4,8,12-trien-1-yn-3-yloxy) triisopropylsilane **14a**.

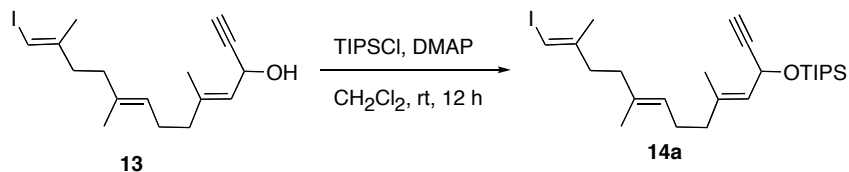

To a solution of propargylic alcohol **13** (1.0 g, 2.8 mmol) in  $\text{CH}_2\text{Cl}_2$  (10 mL) was added DMAP (0.68 g, 5.6 mmol) and TIPSCl (1.2 mL, 5.6 mmol). The reaction mixture was stirred at room temperature for 12 hours and quenched with  $\text{H}_2\text{O}$  (10 mL). Diethyl ether (3 \* 20 mL) was added to extract the product from the aqueous layer. The combined organic layer was washed with saturated aqueous  $\text{NH}_4\text{Cl}$  (50 mL), brine (50 mL), and then dried over  $\text{MgSO}_4$ . Removal of the solvent under reduced pressure followed by flash chromatography on silica gel (19:1 hexanes/EtOAc as eluent) provided the desired product **14a** as a colorless oil (1.43 g, 2.8 mmol, 100%).  $^1\text{H}$  NMR ( $\text{CDCl}_3$ , 500 MHz)  $\delta$  1.03-1.13 (m, 21H), 1.57 (s, 3H), 1.65 (s, 3H), 1.80 (s, 3H), 1.98-2.08 (m, 6H), 2.58 (t, 2H,  $J = 2.7$  Hz), 2.41 (d, 1H,  $J = 2.1$  Hz), 5.07-5.12 (m, 2H), 5.32-5.34 (d, 1H,  $J = 7.8$  Hz), 5.84 (s, 1H);  $^{13}\text{C}$  NMR ( $\text{CDCl}_3$ , 125 MHz)  $\delta$  12.19, 15.89, 16.68, 17.90, 23.88, 25.98, 37.90, 38.29, 39.08, 59.94, 71.43, 74.61, 85.08, 124.54, 126.19, 134.25, 136.56, 147.91; IR (neat) 3308, 2942, 2889, 1462  $\text{cm}^{-1}$ ; MS (EI)  $m/z$  (% rel intensity) 514  $\text{M}^+$  (0.04), 471 (1.4), 131 (81), 103 (100), 75 (83). Anal calcd for  $\text{C}_{25}\text{H}_{43}\text{OISi}$ : C, 58.35; H, 8.42. Found: C, 58.60; H, 8.77. Colorless oil;  $R_f = 0.20$  (hexanes).

### Preparation of carbene complex **3a**

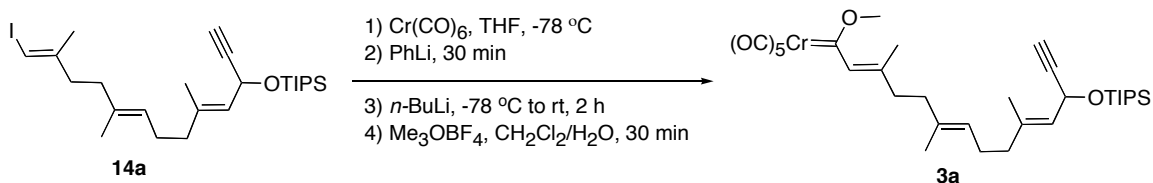

To a solution of vinyl iodide **14a** (375 mg, 0.73 mmol) in THF (15 mL) at room temperature was added  $\text{Cr}(\text{CO})_6$  (177 mg, 0.80 mmol) as a powder. The reaction mixture was cooled to  $-78\text{ }^\circ\text{C}$ , and PhLi (0.456 mL, 0.73 mmol, 1.6 M solution) was added dropwise. The mixture was stirred for 30 minutes at  $-78\text{ }^\circ\text{C}$ , and then *n*-BuLi (0.34 mL, 0.73 mmol, 2.27 M) was added dropwise. The solution was stirred for another 30 minutes, and then warmed up to room temperature and stirred for 1.5 hours. The solvent of the reaction was then removed *in vacuo*, and the residue was dissolved in 1:1  $\text{H}_2\text{O}/\text{CH}_2\text{Cl}_2$  (15 mL). Upon addition of  $\text{Me}_3\text{OBF}_4$  (210 mg, 1.47 mmol), the solution turned red immediately. After stirring 30 minutes at room temperature, saturated aqueous  $\text{NaHCO}_3$  and  $\text{Et}_2\text{O}$  was added to quench the alkylation. The aqueous layer was extracted with  $\text{Et}_2\text{O}$  until the color of the aqueous layer was pale. The combined organic layer was washed with brine, and then dried over  $\text{MgSO}_4$  and concentrated *in vacuo*. The residue was purified by flash column chromatography on silica gel using 2% EtOAc in hexanes as eluent to give carbene complex **3a** (233 mg, 0.37 mmol, 51%) as a red oil.  $^1\text{H}$  NMR ( $\text{CDCl}_3$ , 500 MHz)  $\delta$  1.03-1.10 (m, 21), 1.60 (s, 3 H), 1.65 (s, 3H), 1.82 (s, 3H), 2.00-2.15 (m, 8H), 2.40 (d, 1 H,  $J = 2.1\text{ Hz}$ ), 4.69 (s, 3H), 5.01-5.12 (m, 2H), 5.32 (d, 1 H,  $J = 7.8\text{ Hz}$ ), 7.20 (s, 1H).  $^{13}\text{C}$  NMR ( $\text{CDCl}_3$ , 125 MHz)  $\delta$  12.10, 15.87, 16.57, 17.85, 17.91, 20.61, 25.86, 37.80, 38.96, 39.74, 59.86, 66.13, 71.43, 84.97, 124.66, 126.15, 133.94, 136.40, 140.95, 142.79, 216.75, 223.94, 339.37; IR (neat) 2946w, 2868w, 2058s, 1935vs, 1250w, 1061w, 667s, 650m  $\text{cm}^{-1}$ . Anal calcd for  $\text{C}_{32}\text{H}_{46}\text{CrO}_7\text{Si}$ : C, 61.71; H, 7.44. Found: C, 62.05; H, 7.76. Red oil;  $R_f = 0.63$  (3:1 hexanes/EtOAc).

### Preparation of MOM protected vinyl iodide **14b**.

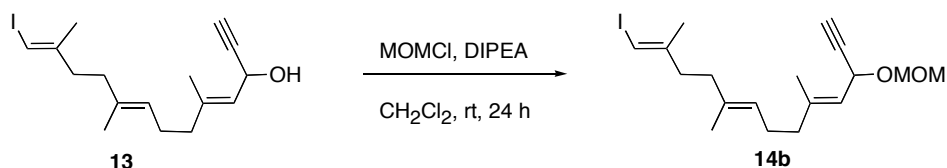

To a solution of **13** (562 mg, 1.57 mmol) in 10 mL of  $\text{CH}_2\text{Cl}_2$  at room temperature was added DIPEA (0.820 mL, 4.71 mmol) and MOMCl (0.238 mL, 3.14 mmol). The resulting solution was stirred for 1 day, and then quenched with saturated aqueous  $\text{NaHCO}_3$  (10 mL). The aqueous layer was extracted with  $\text{Et}_2\text{O}$  (2 \* 10 mL). The combined organic layer was washed with brine (10 mL), dried over  $\text{Na}_2\text{SO}_4$ , filtered and concentrated. The crude product was purified by chromatography on silica gel using 9:1 hexanes/EtOAc as eluent to give an 80% yield of MOM ether **14b** (504 mg, 1.25 mmol).  $^1\text{H}$  NMR ( $\text{CDCl}_3$ , 500 MHz)  $\delta$  1.57 (s, 3H), 1.71 (d, 3H,  $J = 1.3\text{ Hz}$ ), 1.80 (d, 3H,  $J = 1.1\text{ Hz}$ ), 2.02-2.14 (m, 6H), 2.25-2.27 (m, 2H), 2.43 (d, 1H,  $J = 2.1\text{ Hz}$ ), 3.38 (s, 3H), 4.60 (d, 1H,  $J = 6.9\text{ Hz}$ ), 4.82 (d, 1H,  $J = 6.9\text{ Hz}$ ), 5.02-5.09 (m, 2H), 5.29 (dq, 1H,  $J = 8.9, 1.2\text{ Hz}$ ), 5.83-5.84 (m, 1H);  $^{13}\text{C}$  NMR ( $\text{CDCl}_3$ , 125 MHz)  $\delta$  15.88, 16.57, 23.85, 25.94, 37.84, 38.24, 39.20, 55.61, 61.46, 73.13, 74.66, 82.18, 93.13, 121.63, 124.36, 134.44, 141.56, 147.82; IR (neat) 3295, 2926, 1449, 1150, 1094, 1028, 924, 629  $\text{cm}^{-1}$ ; HRMS (CI) calcd for  $(\text{C}_{18}\text{H}_{27}\text{O}_2\text{I}+\text{H})^+$   $m/z$  403.1134, meas 403.1124. Colorless oil;  $R_f = 0.34$  (9:1 hexanes/EtOAc).

### Preparation of carbene complex 3b.

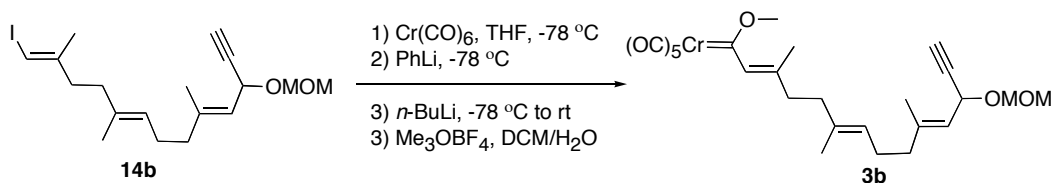

To a solution of vinyl iodide **14b** (49.1 mg, 0.122 mmol) in THF (5 mL) at room temperature was added  $\text{Cr}(\text{CO})_6$  (30 mg, 0.136 mmol) as a powder. The solution was cooled to  $-78\text{ }^\circ\text{C}$ , and PhLi (0.076 mL, 0.122 mmol, 1.6 M in THF) was added dropwise. After stirring for 30 minutes at  $-78\text{ }^\circ\text{C}$ , *n*-BuLi (0.047 mL, 0.122 mmol, 2.6 M in hexanes) was added dropwise. The solution was stirred for another 30 minutes, and then warmed up to room temperature and stirred for 1.5 hours. The solvent of the reaction was removed *in vacuo*, and the residue was dissolved in 1:1 mixture of  $\text{H}_2\text{O}/\text{CH}_2\text{Cl}_2$ . Upon addition of  $\text{Me}_3\text{OBF}_4$  (36 mg, 0.249 mmol), the solution turned red immediately. After stirring 30 minutes at room temperature, saturated aqueous  $\text{NaHCO}_3$  (10 mL) and  $\text{Et}_2\text{O}$  (10 mL) was added to quench the alkylation reaction. The aqueous layer was extracted with  $\text{Et}_2\text{O}$  until the color of the aqueous layer was pale. The combined organic layer was washed with brine, dried over  $\text{MgSO}_4$  and concentrated *in vacuo*. The residue was purified by flash column chromatography on silica gel using 9:1 hexanes/ $\text{EtOAc}$  as eluent to give carbene complex **3b** as a red oil (26.6 mg, 0.052 mmol, 43%). This carbene complex was unstable and subjected to thermolysis right after isolation.  $^1\text{H}$  NMR ( $\text{CDCl}_3$ , 500 MHz)  $\delta$  1.60 (s, 3H), 1.71 (d, 3H,  $J = 1.1$  Hz), 1.82 (s, 3H), 2.03-2.21 (m, 8H), 2.44 (d, 1H,  $J = 2.2$  Hz), 3.38 (s, 3H), 4.60 (d, 1H,  $J = 6.9$  Hz), 4.70 (s, 3H), 4.83 (d, 1H,  $J = 6.9$  Hz), 5.05 (dd, 1H,  $J = 8.9, 2.2$  Hz), 5.10-5.13 (m, 1H), 5.28-5.30 (m, 1H), 7.21 (s, 1H);  $^{13}\text{C}$  NMR ( $\text{CDCl}_3$ , 125 MHz)  $\delta$  15.60, 16.55, 20.60, 25.98, 37.88, 39.18, 39.75, 55.64, 61.54, 66.18, 73.14, 82.22, 93.20, 115.23, 121.77, 124.57, 134.27, 141.02, 141.47, 216.82, 223.97 (The carbene carbon was not located); IR (neat) 3308, 2919, 2058, 1931, 665  $\text{cm}^{-1}$ . Red oil;  $R_f = 0.19$  (9:1 hexanes/ $\text{EtOAc}$ ).

### Thermolysis of carbene complex 3a.

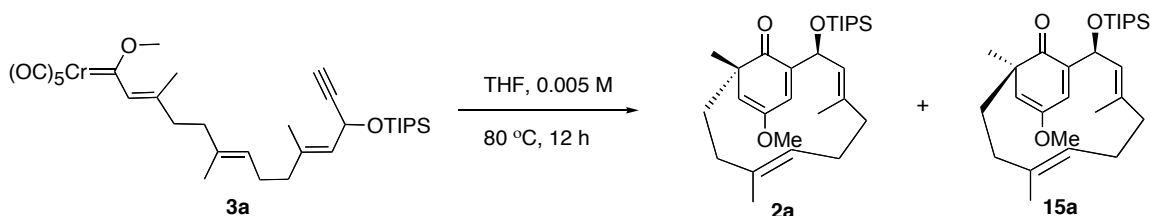

The carbene complex **3a** (212 mg, 0.341 mmol) was dissolved in THF (17 mL) and transferred to a Schlenk flask equipped with a threaded Teflon high vacuum stopcock. The reaction mixture was deoxygenated by the freeze-pump-thaw procedure with 3 cycles. Then the flask was back filled with an argon atmosphere at room temperature, sealed and heated to  $80\text{ }^\circ\text{C}$ . After the reaction was completed (indicated by the fading of the red color of **3a**), the solvent was removed *in vacuo*. The residue was taken up in 1:1 mixed solvent of  $\text{Et}_2\text{O}$  and  $\text{CH}_2\text{Cl}_2$ , and stirred in air for 12 hours. Then the solvent was removed and the residue was taken up in pure  $\text{Et}_2\text{O}$ . The insoluble material was removed by filtration through silica gel in a pipette-sized column using  $\text{Et}_2\text{O}$  as the eluent. Concentration of the filtrate provided the crude product mixture, which was further purified by flash column chromatography on silica gel (45:1:1 hexanes/ $\text{Et}_2\text{O}/\text{CH}_2\text{Cl}_2$  as the

eluent) to give a 37% yield of major isomer (57.7 mg, 0.126 mmol) and a 19% yield of minor isomer (29.7 mg, 0.065 mmol). The 2:1 ratio of diastereomers **2a** and **15a** was also verified on the crude reaction mixture by  $^1\text{H}$  NMR based on the integral of the following vinyl peaks:  $\delta$  6.99 for **2a** and 6.42 for **15a**. This reaction was carried out several times at 80 °C with concentrations in the range of 0.005 to 0.02 M with ratios of **2a:15a** ranging from 2:1 to 3:1 and combined yields of 47-65%. This reaction was carried out three times at 60 °C with concentrations in the range of 0.005 to 0.02 M with ratios of **2a:15a** ranging from 3:1 to 4:1 and combined yields of 60-66%. This reaction was carried out once at 100 °C at 0.005 and gave a ratio of **2a:15a** of 2:1 and a combined yield of 63%.

**Major isomer 2a**  $^1\text{H}$  NMR ( $\text{CDCl}_3$ , 500 MHz)  $\delta$  0.98-1.06 (m, 21H), 1.10 (s, 3H), 1.34-1.42 (m, 2H), 1.52 (s, 3H), 1.64 (s, 3H), 1.67-2.09 (m, 4H), 2.26-2.39 (m, 2H), 3.63 (s, 3H), 4.48 (d, 1H,  $J = 11.4$  Hz), 4.67 (d, 1H,  $J = 8.1$  Hz), 4.90 (d, 1H,  $J = 3.3$  Hz), 5.42 (dd, 1H,  $J = 9.0, 0.9$  Hz), 6.99 (dd, 1H,  $J = 3.3, 0.9$  Hz);  $^{13}\text{C}$  NMR ( $\text{CDCl}_3$ , 125 MHz)  $\delta$  12.13, 15.28, 15.67, 17.91, 17.96, 25.53, 29.85, 36.24, 37.96, 46.70, 54.71, 64.93, 65.83, 110.40, 124.70, 129.97, 134.18, 134.38, 134.86, 141.82, 151.12, 202.25; IR (neat) 2944, 2867, 1647  $\text{cm}^{-1}$ ; MS(EI)  $m/z$  (% rel intensity) 458  $\text{M}^+$  (10), 430 (7), 415 (18), 347 (19), 324 (52), 279 (66), 241 (80), 189 (41), 131 (30), 115 (34), 103 (48), 81 (100), 75 (100). HRMS calcd for  $\text{C}_{28}\text{H}_{46}\text{O}_3\text{Si}$   $m/z$  458.3216, meas 458.3218. Light yellow oil;  $R_f = 0.65$  (10:1:1 hexanes/ $\text{Et}_2\text{O}/\text{CH}_2\text{Cl}_2$ ).

**Minor isomer 15a**  $^1\text{H}$  NMR ( $\text{CDCl}_3$ , 500 MHz)  $\delta$  0.99-1.03 (m, 21H), 1.12 (s, 3H), 1.35-1.56 (m, 2H), 1.43 (s, 3H), 1.45 (s, 3H), 1.85-2.13 (m, 5H), 2.30 (t, 1H,  $J = 11.4$  Hz), 3.60 (s, 3H), 4.59 (t, 1H,  $J = 8$  Hz), 4.86 (d, 1H,  $J = 8.1$  Hz), 4.93 (d, 1H,  $J = 2.7$  Hz), 5.72 (d, 1H,  $J = 8.1$  Hz), 6.42 (d, 1H,  $J = 3.0$  Hz);  $^{13}\text{C}$  NMR ( $\text{CDCl}_3$ , 125 MHz)  $\delta$  12.19, 15.45, 15.50, 17.99, 25.29, 28.30, 36.01, 38.11, 39.43, 50.14, 54.80, 72.73, 111.05, 123.03, 130.67, 132.29, 134.92, 137.11, 138.35, 149.65, 201.08; IR (neat) 2940, 2864, 1651  $\text{cm}^{-1}$ ; MS (EI)  $m/z$  (% rel intensity) 458  $\text{M}^+$  (2), 415 (33), 347 (15), 279 (100), 241(11), 189 (13), 131 (30), 103 (38), 81 (67), 75 (68); HRMS calcd for  $\text{C}_{28}\text{H}_{46}\text{O}_3\text{Si}$   $m/z$  458.3216, meas 458.3216. Light yellow solid, m.p. 84-86 °C;  $R_f = 0.60$  (10:1:1 hexanes/ $\text{Et}_2\text{O}/\text{CH}_2\text{Cl}_2$ ).

### Thermolysis of carbene complex **3b**.

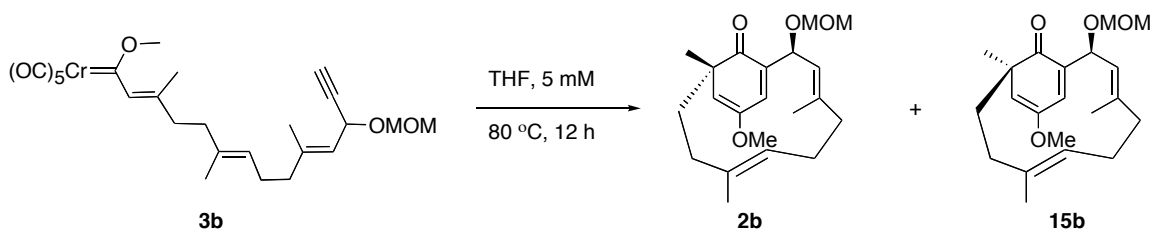

The carbene complex **3b** (26.6 mg, 0.052 mmol) was dissolved in THF (10.4 mL) and transferred to a Schlenk flask equipped with a threaded Teflon high vacuum stopcock. The reaction mixture was deoxygenated by the freeze-pump-thaw procedure with 3 cycles. Then the flask was back filled with an argon atmosphere at room temperature, sealed and heated to 80 °C. After the reaction was completed (indicated by the fading of the red color of **3b**), the solvent was removed *in vacuo*. The residue was taken up in a 1:1 mixture of  $\text{Et}_2\text{O}$  and  $\text{CH}_2\text{Cl}_2$ , and stirred in air for 12 hours. Then the solvent was removed again and the residue was taken up in pure  $\text{Et}_2\text{O}$ . The insoluble material was removed by filtration through silica gel in a pipette-sized column using  $\text{Et}_2\text{O}$  as the eluent. Concentration of the filtrate provided the crude product mixture, which was further purified by flash column chromatography on silica gel (15:1:1 hexanes/ $\text{Et}_2\text{O}/\text{CH}_2\text{Cl}_2$  as the eluent) to give a 1:1 ratio of **2b** (2.2 mg, 0.0064 mmol, 12%) and **15b** (2.5 mg, 0.0072 mmol, 14%). The ratio of diastereomers **2b** and **15b** was determined on the crude reaction mixture by  $^1\text{H}$  NMR based on the integral of the following vinyl peaks:  $\delta$  6.92 for **2b** and 6.58 for **15b**.





### Preparation of MOM ether **362** from alcohol **2b**.

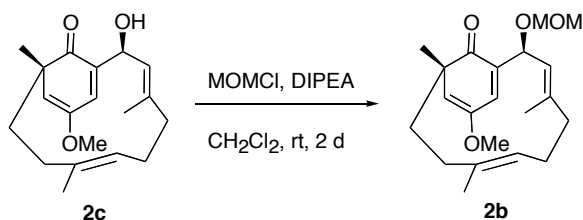

To a solution of **2c** (166 mg, 0.55 mmol) in 10 mL of  $\text{CH}_2\text{Cl}_2$  at room temperature was added DIPEA (0.287 mL, 1.65 mmol) and MOMCl (0.083 mL, 1.10 mmol). The resulting solution was stirred for 2 days, and then quenched with saturated aqueous  $\text{NaHCO}_3$  (10 mL). The aqueous layer was extracted with  $\text{Et}_2\text{O}$  (2 \* 10 mL). The combined organic layer was washed with brine (10 mL), dried over  $\text{Na}_2\text{SO}_4$ , filtered and concentrated *in vacuo*. The crude product was purified by chromatography on silica gel with 9:1 hexanes/ $\text{EtOAc}$  as eluent to give an 88% yield of MOM ether **2b** (167 mg, 0.0484 mmol). The spectral data for this compound matched that for a product obtained from the thermolysis of compound **2b** (vide supra).

### Preparation of dienone **16**.

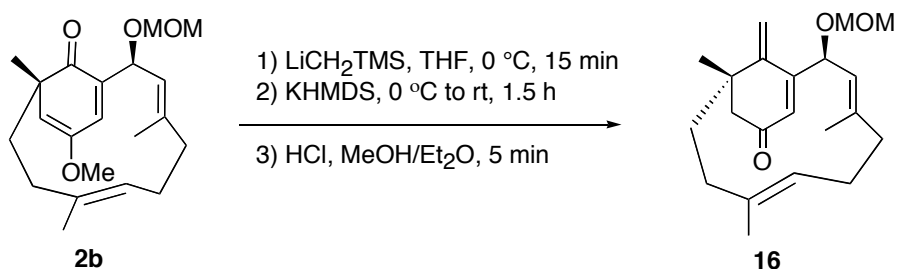

Trimethylsilylmethyl lithium (1.0 M in THF, 0.12 mL) was added dropwise to a solution of compound **2b** (20.7 mg, 0.0598 mmol) in 0.3 mL of THF at 0 °C. The solution was stirred for 15 minutes at 0 °C, and then KHMDS (0.24 mL, 0.12 mmol, 0.5 M in toluene) was added. The reaction mixture was stirred for 1.5 hours at room temperature before quenching with  $\text{H}_2\text{O}$  (5 mL). The aqueous phase was separated and extracted with  $\text{Et}_2\text{O}$  (3 \* 10 mL). The combined organic layer was washed with brine (20 mL), dried over  $\text{Na}_2\text{SO}_4$  and concentrated *in vacuo* to give an unstable enol ether intermediate. The crude enol ether was dissolved in 1 mL of MeOH, and then treated with 1 mL of 1% aqueous HCl and stirred at room temperature for 5 minutes. The mixture was diluted with  $\text{Et}_2\text{O}$  (5 mL) and neutralized with saturated aqueous  $\text{NaHCO}_3$  (10 mL). The aqueous phase was separated and then extracted with  $\text{Et}_2\text{O}$  (2 \* 10 mL). The combined organic layer was washed with brine (10 mL), dried over  $\text{Na}_2\text{SO}_4$  and concentrated *in vacuo*. The residue was purified by flash column chromatography on silica gel with a 9:1 hexanes/ $\text{Et}_2\text{O}$  as eluent to give ketone **16** (14.6 mg, 0.0442 mmol, 74%).  $^1\text{H NMR}$  ( $\text{CDCl}_3$ , 500 MHz)  $\delta$  1.18 (s, 3H), 1.35-1.41 (m, 1H), 1.44 (s, 3H), 1.67 (d, 3H,  $J = 1.2$  Hz), 1.69-1.80 (m, 2H), 2.02-2.13 (m, 5H), 2.23 (d, 1H,  $J = 16.0$  Hz), 2.46 (d, 1H,  $J = 16.0$  Hz), 3.35 (s, 3H), 4.53 (d, 1H,  $J = 6.8$  Hz), 4.63-4.67 (m, 2H), 4.69 (d, 1H,  $J = 6.8$  Hz), 5.27 (dd, 1H,  $J = 9.8, 1.1$  Hz), 5.30 (d, 1H,  $J = 1.5$  Hz), 5.42 (s, 1H), 6.28 (s, 1H);  $^{13}\text{C NMR}$  ( $\text{CDCl}_3$ , 125 MHz)  $\delta$  16.33, 16.74, 24.34, 24.84, 34.23, 35.59, 38.43, 42.81, 54.21, 55.46, 68.86, 93.23, 114.90, 122.99, 124.46, 124.63, 135.80, 140.37, 146.42, 157.38, 199.45; IR (neat) 2923, 1671, 1583, 1150, 1036, 916  $\text{cm}^{-1}$ ; mass spectrum  $m/z$  (% rel intensity) 330  $\text{M}^+$  (0.8), 285 (2), 269 (3), 247 (3), 105 (15), 91 (24), 81 (15), 66 (18), 45 (100). HRMS (FAB)

calcd for  $(C_{21}H_{30}O_3+H)^+$   $m/z$  331.2271, meas 331.2273. Light yellow oil;  $R_f = 0.40$  (3:1 hexanes/EtOAc).

### Methylation of dienone 16.

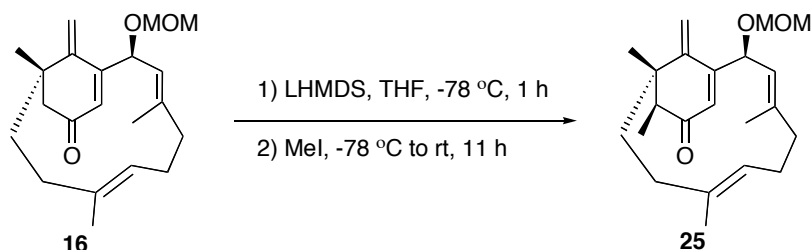

A solution of ketone **16** (9.7 mg, 0.0292 mmol) in 0.50 mL of THF was added to a solution of LHMDS (1.0 M in THF, 0.050 mL, 0.050 mmol) in THF at  $-78\text{ }^\circ\text{C}$ . After stirring for 1 hour, iodomethane (4  $\mu\text{L}$ , 0.07 mmol) was added. The cooling bath was removed immediately and the reaction mixture was allowed to warm to room temperature. After stirring for 11 hours, 2 mL of saturated aqueous  $\text{NH}_4\text{Cl}$  was added to the flask. The aqueous layer was extracted with  $\text{Et}_2\text{O}$  (2 \* 10 mL). The combined organic layer was washed with brine (10 mL), and then dried over  $\text{MgSO}_4$ . The residue was purified by flash column chromatography on silica gel with 9:1 hexanes/ $\text{Et}_2\text{O}$  as eluent to give ketone **25** (9.0 mg, 0.0261 mmol, 96%).  $^1\text{H}$  NMR ( $\text{CDCl}_3$ , 500 MHz)  $\delta$  0.96 (d, 3H,  $J = 7.3$  Hz), 1.09 (s, 3H), 1.35-1.41 (m, 1H), 1.53 (s, 3H), 1.67 (d, 3H,  $J = 1.2$  Hz), 1.69-1.74 (m, 1H), 1.78-1.83 (m, 1H), 2.01-2.16 (m, 6H), 3.35 (s, 3H), 4.53 (d, 1H,  $J = 6.5$  Hz), 4.64-4.66 (m, 2H), 4.68 (d, 1H,  $J = 6.5$  Hz), 5.26-5.28 (m, 2H), 5.51 (s, 1H), 6.17 (s, 1H);  $^{13}\text{C}$  NMR ( $\text{CDCl}_3$ , 125 MHz)  $\delta$  13.95, 16.48, 16.58, 21.07, 24.33, 34.50, 36.41, 38.21, 45.65, 55.48, 55.51, 68.82, 93.34, 116.94, 120.98, 124.56, 124.80, 135.84, 140.14, 144.69, 156.08, 204.60; IR (neat) 2934, 1671s, 1587, 1150, 1036, 916  $\text{cm}^{-1}$ ; mass spectrum  $m/z$  (% rel intensity) 344  $\text{M}^+$  (1), 329 (0.4), 135 (13), 119 (15), 107 (16), 95 (12), 91 (15), 81 (22), 79 (17), 55 (24), 45 (100); HRMS (FAB) calcd for  $(C_{22}H_{32}O_3+H)^+$   $m/z$  345.2430, meas 345.2430. Colorless oil;  $R_f = 0.38$  (3:1 hexanes/EtOAc).

### Cleavage of MOM group in 25.

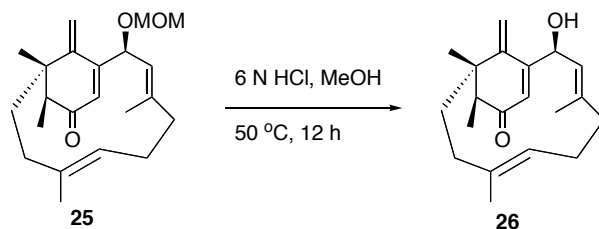

To a solution of MOM ether **25** (25 mg, 0.0727 mmol) in 3.7 mL of MeOH at room temperature was added 6 N HCl (0.024 mL). The reaction mixture was heated at  $50\text{ }^\circ\text{C}$  for 12 hours, and then cooled to room temperature. The mixture was diluted with  $\text{Et}_2\text{O}$  (5 mL) and neutralized with saturated aqueous  $\text{NaHCO}_3$  (10 mL). The aqueous phase was separated and then extracted with  $\text{Et}_2\text{O}$  (2 \* 10 mL). The combined organic layer was washed with brine (10 mL), and then dried over  $\text{Na}_2\text{SO}_4$  and concentrated *in vacuo*. The residue was purified by flash column chromatography on silica gel with 7:3 hexanes/ $\text{Et}_2\text{O}$  as eluent to give alcohol **26** (20.2 mg, 0.0672 mmol, 93%).  $^1\text{H}$  NMR ( $\text{CDCl}_3$ , 500 MHz)  $\delta$  0.95 (d, 3H,  $J = 7.2$  Hz), 1.08 (s, 3H), 1.35-1.41 (m, 1H), 1.43 (s, 3H), 1.67 (d, 3H,  $J = 1.4$  Hz), 1.71-1.72 (m, 1H), 1.78-1.83 (m, 1H), 2.02-2.14 (m,

6H), 4.64 (t, 1H,  $J = 6.5$  Hz), 4.76 (dd, 1H,  $J = 9.5, 1.0$  Hz), 5.24 (d, 1H,  $J = 1.6$  Hz), 5.35 (d, 1H,  $J = 9.6$  Hz), 5.47 (s, 1H), 6.24 (s, 1H);  $^{13}\text{C}$  NMR ( $\text{CDCl}_3$ , 125 MHz)  $\delta$  13.89, 16.59, 16.37, 21.00, 24.29, 34.48, 36.43, 38.07, 45.72, 55.60, 66.50, 116.75, 120.28, 124.87, 126.74, 135.86, 128.98, 144.45, 157.73, 204.63; IR (neat) 3405 brs, 2932, 1653, 1385  $\text{cm}^{-1}$ ; mass spectrum  $m/z$  (% rel intensity) 300  $\text{M}^+$  (11), 189 (22), 187 (18), 176 (20), 173 (23), 169 (15), 161 (25), 159 (26), 148 (20), 145 (21), 141 (23), 135 (61), 128 (26), 121 (29), 105 (35), 91 (63), 81 (98), 77 (71), 67 (52), 55 (80), 53 (42), 41 (100); HRMS (FAB) calcd for  $(\text{C}_{20}\text{H}_{28}\text{O}_2+\text{H})^+$   $m/z$  301.2168, meas 301.2166. Colorless oil;  $R_f = 0.11$  (3:1 hexanes/EtOAc).

### Preparation of TIPS ether **27**.

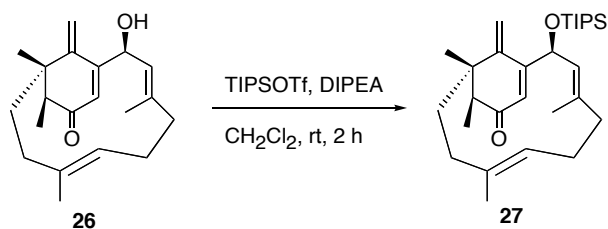

To a solution of allylic alcohol **26** (10.4 mg, 0.0347 mmol) in  $\text{CH}_2\text{Cl}_2$  (1.7 mL) was added DIEPA (0.024 mL, 0.139 mmol) followed by the addition of triisopropylsilyl triflate (0.019 mL, 0.069 mmol). The reaction mixture was stirred at room temperature for 2 hours and quenched with  $\text{H}_2\text{O}$  (10 mL). Diethyl ether (3 \* 10 mL) was added to extract the product from the aqueous layer. The combined organic layer was washed with brine (15 mL), and then dried over  $\text{Na}_2\text{SO}_4$ . Removal of the solvent under reduced pressure followed by flash chromatography on silica gel (9:1 hexanes/EtOAc as eluent) provided the desired product **27** (15.4 mg, 0.0337 mmol, 97%) as a colorless oil.  $^1\text{H}$  NMR ( $\text{CDCl}_3$ , 500 MHz)  $\delta$  0.93 (d, 3H,  $J = 7.2$  Hz), 1.00-1.07 (m, 21H), 1.08 (s, 3H), 1.35-1.40 (m, 1H), 1.44 (s, 3H), 1.59 (d, 3H,  $J = 2.4$  Hz), 1.67-1.71 (m, 1H), 1.76-1.81 (m, 1H), 2.03-2.10 (m, 6H), 4.67-4.69 (m, 1H), 4.81 (d, 1H,  $J = 8.8$  Hz), 5.24 (d, 1H,  $J = 1.5$  Hz), 5.30 (dd, 1H,  $J = 9.0, 1.1$  Hz), 5.45 (s, 1H), 6.30 (s, 1H);  $^{13}\text{C}$  NMR ( $\text{CDCl}_3$ , 125 MHz)  $\delta$  12.15, 13.74, 16.40, 16.76, 17.87, 17.98, 20.99, 24.39, 34.34, 36.85, 38.60, 45.70, 55.87, 67.00, 116.42, 121.10, 124.50, 127.67, 135.75, 136.75, 144.67, 158.72, 205.07; IR (neat) 2944, 2857, 1671, 1462, 1109, 1096, 884  $\text{cm}^{-1}$ ; mass spectrum  $m/z$  (% rel intensity) 456  $\text{M}^+$  (7), 413 (42), 171 (17), 157 (16), 143 (18), 141 (18), 131 (51), 128 (42), 119 (30), 103 (86), 95 (36), 91 (28), 81 (45), 79 (38), 76 (58), 75 (100), 73 (29), 61 (81), 59 (58), 55 (40), 43 (37); HRMS (FAB) calcd for  $(\text{C}_{29}\text{H}_{48}\text{O}_2\text{Si}+\text{H})^+$   $m/z$  457.3489, meas 457.3484. White solid;  $R_f = 0.29$  (9:1 hexanes/EtOAc).

### Reduction and acetylation of dienone **27**.

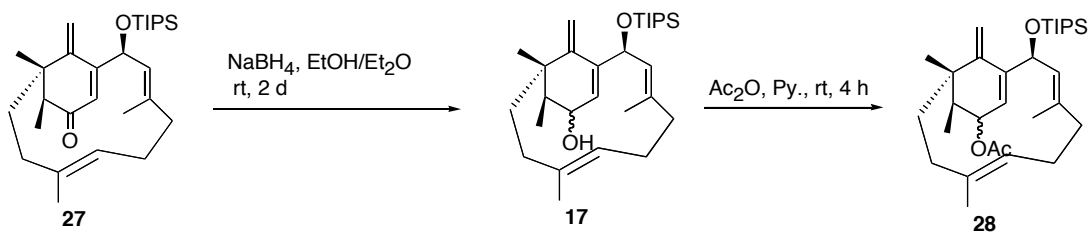

To a solution of dienone **27** (71.2 mg, 0.156 mmol) in 3.0 mL of 1:1 mixture of EtOH/ $\text{Et}_2\text{O}$  was added  $\text{NaBH}_4$  (53 mg, 1.56 mmol) at room temperature. The reaction mixture was stirred at room temperature until all of the ketone was consumed (monitored by TLC, ~ 2 days). The

reaction was quenched with H<sub>2</sub>O, and the aqueous layer was extracted with Et<sub>2</sub>O (3 \* 20 mL). The combined organic layer was washed with brine (20 mL) and dried over Na<sub>2</sub>SO<sub>4</sub>. After filtration and concentration to give 61.7 mg alcohol **17** (0.147 mg, 94%). The residue was dissolved in 4 mL of pyridine, and then 1.0 mL of acetic anhydride was added. The mixture was stirred at room temperature for 4 hours and then was evaporated to dryness. The residue was purified by column chromatography on silica gel using 9:1 hexanes/EtOAc as eluent to give inseparable acetate **28** as a 2:1 Inseparable mixture of isomers (65.5 mg, 0.131 mmol, 84%) as a colorless oil.

### Preparation of Alcohols **18** and **19**.

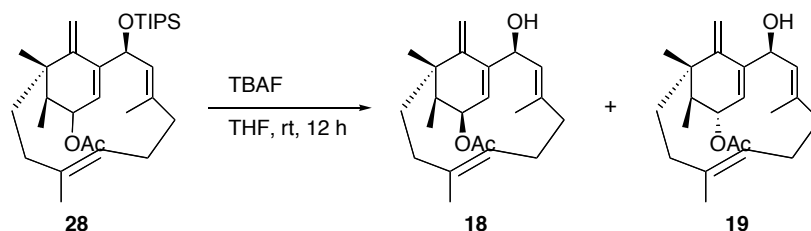

To a solution of the above mixture of acetated **28** (65.5 mg, 0.131 mmol) in 6.5 mL of dry THF at room temperature was added TBAF (0.26 mL, 0.26 mmol, 1.0 M in THF) dropwise. The mixture was stirred overnight and then quenched with H<sub>2</sub>O (15 mL). The aqueous layer was extracted with Et<sub>2</sub>O (3 \* 20 mL). The combined organic layer was washed with brine (20 mL) and dried over Na<sub>2</sub>SO<sub>4</sub>. Filtration and concentration followed by flash chromatography on silica gel using 4:1 hexanes/EtOAc as eluent provided a ratio of 1:2 allylic alcohols **19** (10.1 mg) and **18** (20.0 mg) and 5.4 mg of mixture of the two products (0.103 mmol, 79% overall yield) as a colorless oil.

**Major isomer 18** <sup>1</sup>H NMR (CDCl<sub>3</sub>, 500 MHz) δ 0.71 (d, 3H, *J* = 6.8 Hz), 1.04 (s, 3H), 1.48 (s, 3H), 1.49-1.51 (m, 1H), 1.64 (s, 3H, *J* = 1.2 Hz), 1.71-1.76 (m, 1H), 1.84-1.89 (m, 2H), 2.06 (s, 3H), 2.01-2.10 (m, 5H), 4.65-4.68 (m, 1H), 4.75 (d, 1H, *J* = 9.5 Hz), 4.89 (s, 1H), 5.07 (s, 1H), 5.21-5.23 (m, 1H), 5.73 (d, 1H, *J* = 5.6 Hz), 5.78 (s, 1H); <sup>13</sup>C NMR (CDCl<sub>3</sub>, 125 MHz) δ 9.31, 16.35, 17.03, 21.31, 21.62, 24.43, 33.71, 35.57, 38.40, 43.49, 44.92, 66.37, 72.19, 110.72, 118.91, 124.86, 128.96, 136.04, 136.84, 141.96, 144.49, 170.79; IR (neat) 3445, 2936, 1734, 1719, 1242, 1022 cm<sup>-1</sup>; mass spectrum *m/z* (% rel intensity) 344 M<sup>+</sup> (1), 302 (1), 203 (16), 187 (19), 185 (17), 173 (34), 171 (25), 161 (16), 159 (30), 157 (19), 147 (34), 145 (31), 137 (25), 135 (36), 133 (36), 121 (45), 119 (67), 115 (23), 107 (44), 105 (61), 95 (36), 93 (49), 91 (69), 84 (43), 81 (100), 79 (43), 77 (33), 67 (32), 556 (32), 55 (27); HRMS (CI) calcd for (C<sub>22</sub>H<sub>31</sub>O<sub>2</sub>)<sup>+</sup> (M-H<sub>2</sub>O+H) *m/z* 327.2324, meas 327.2313. Colorless oil; R<sub>f</sub> = 0.31 (3:1 hexanes/EtOAc).

**Minor isomer 19** <sup>1</sup>H NMR (CDCl<sub>3</sub>, 500 MHz) δ 0.83 (d, 3H, *J* = 6.8 Hz), 0.97 (s, 3H), 1.48 (s, 3H), 1.49 (d, 1H, *J* = 2.4 Hz), 1.65 (d, 3H, *J* = 1.5 Hz), 1.73-1.75 (m, 1H), 1.81-1.85 (m, 2H), 2.01-2.06 (m, 4H), 2.08 (s, 3H), 2.11-2.15 (m, 1H), 4.68-4.70 (m, 1H), 4.78 (d, 1H, *J* = 9.6 Hz), 4.99 (d, 1H, *J* = 1.5 Hz), 5.04 (s, 1H), 5.11-5.14 (m, 1H), 5.23 (d, 1H, *J* = 9.3 Hz), 5.92-5.93 (m, 1H); <sup>13</sup>C NMR (CDCl<sub>3</sub>, 125 MHz) δ 12.92, 15.91, 16.42, 21.42, 24.04, 24.91, 34.68, 34.81, 38.64, 40.61, 41.03, 66.41, 73.35, 110.39, 119.46, 124.89, 128.94, 135.40, 136.79, 141.93, 145.82, 170.78; IR (neat) 3438br, 2922, 1732, 1242, 1022 cm<sup>-1</sup>; mass spectrum *m/z* (% rel intensity) 344 M<sup>+</sup> (1), 266 (17), 251 (16), 209 (17), 195 (20), 185 (32), 183 (22), 173 (52), 171 (64), 159 (39), 157 (64), 147 (29), 143 (38), 134 (32), 128 (67), 119 (49), 105 (43), 95 (32), 93 (32), 91 (50), 81 (91), 77 (55), 69 (29), 67 (37), 60 (22), 55 (51), 53 (28), 45 (34), 43 (100); HRMS (CI) calcd for (C<sub>22</sub>H<sub>31</sub>O<sub>2</sub>)<sup>+</sup> (M-H<sub>2</sub>O+H) *m/z* 327.2324, meas 327.2325. Colorless oil; R<sub>f</sub> = 0.29 (3:1 hexanes/EtOAc).

### Epoxydation of allylic alcohol 18.

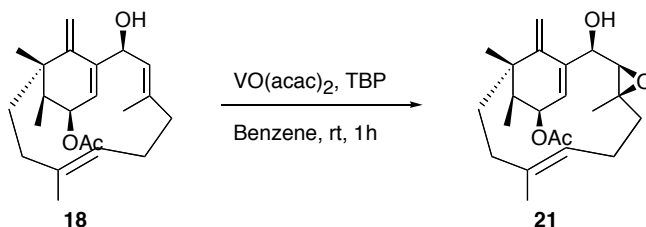

A solution of *tert*-butyl hydroperoxide (75% W/W) in H<sub>2</sub>O (1.8  $\mu\text{L}$  from a new bottle) was added to a stirred solution of vanadyl acetylacetonate (1.0 mg, 0.0038 mmol) and the allylic alcohol **18** (5.0 mg, 0.0145 mmol) in 0.72 mL of benzene at room temperature. After 15 minutes, another 0.9  $\mu\text{L}$  of *tert*-butyl hydroperoxide was added to the solution. The light green solution turned yellow brown, and was stirred at room temperature for 60 minutes before quenching with 2 mL of saturated aqueous Na<sub>2</sub>S<sub>2</sub>O<sub>3</sub>. The aqueous layer was extracted with Et<sub>2</sub>O (3 \* 10 mL). The combined organic layer was washed with brine (15 mL) and dried over Na<sub>2</sub>SO<sub>4</sub>. Filtration and concentration followed by flash chromatography on silica gel using 2:1 hexanes/EtOAc as eluent provided epoxy alcohol **21** (4.6 mg, 0.0128 mmol, 88%) as a colorless oil. <sup>1</sup>H NMR (CDCl<sub>3</sub>, 500 MHz)  $\delta$  0.72 (d, 3H, *J* = 7.0 Hz), 1.03 (d, 3H, *J* = 0.5 Hz), 1.04-1.12 (m, 1H), 1.26 (s, 3H), 1.52 (s, 3H), 1.55-1.59 (m, 1H), 1.65-1.69 (m, 1H), 1.78-1.82 (m, 1H), 1.95-2.04 (m, 3H), 2.05 (s, 3H), 2.06-2.09 (m, 2H), 2.64 (s, 1H), 3.11 (d, 1H, *J* = 1.5 Hz), 4.79 (t, 1H, *J* = 6.8 Hz), 4.99 (s, 1H), 5.13-5.14 (m, 1H), 5.26 (s, 1H), 5.78-5.79 (m, 1H), 5.82-5.83 (m, 1H); <sup>13</sup>C NMR (CDCl<sub>3</sub>, 125 MHz)  $\delta$  9.05, 14.82, 16.51, 21.25, 22.52, 23.43, 32.65, 34.25, 39.04, 43.04, 45.32, 62.59, 64.37, 65.02, 71.69, 111.29, 121.26, 121.57, 135.56, 137.14, 144.18, 170.74; IR (neat) 3497br, 2924, 1738, 1373, 1242, 1024 cm<sup>-1</sup>; mass spectrum *m/z* (% rel intensity) 318 (M-42)<sup>+</sup> (3), 167 (39), 162 (23), 150 (89), 149 (94), 135 (43), 124 (47), 121 (100), 119 (48), 105 (87), 91 (72), 81 (95); HRMS (CI) calcd for (C<sub>22</sub>H<sub>31</sub>O<sub>3</sub>)<sup>+</sup> (M-H<sub>2</sub>O+H) *m/z* 343.2273, meas 343.2281. Colorless oil; R<sub>f</sub> = 0.30 (3:1 hexanes/EtOAc).

### Epoxydation of allylic alcohol 19.

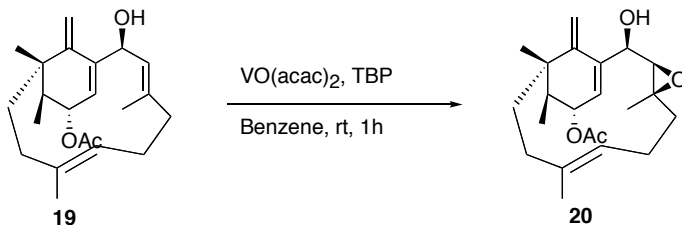

A solution of *tert*-butyl hydroperoxide (75% W/W) in H<sub>2</sub>O (2.2  $\mu\text{L}$  from a new bottle) was added to a stirred solution of vanadyl acetylacetonate (1.1 mg, 0.0041 mmol) and the allylic alcohol **19** (6.0 mg, 0.0174 mmol) in 0.87 mL of benzene at room temperature. After 15 minutes, another 1.1  $\mu\text{L}$  of *tert*-butyl hydroperoxide was added to the solution. The light green solution turned yellow brown, and was stirred at room temperature for 60 minutes before quenching with 2 mL of saturated aqueous Na<sub>2</sub>S<sub>2</sub>O<sub>3</sub>. The aqueous layer was extracted with Et<sub>2</sub>O (3 \* 10 mL). The combined organic layer was washed with brine (15 mL) and dried over Na<sub>2</sub>SO<sub>4</sub>. Filtration and concentration followed by flash chromatography on silica gel using 2:1 hexanes/ EtOAc as eluent provided epoxy alcohol **20** (7.6 mg, 0.0211 mmol, 93%) as a colorless oil. <sup>1</sup>H NMR (CDCl<sub>3</sub>, 500

MHz)  $\delta$  0.84 (d, 3H,  $J = 7.3$  Hz), 0.99 (s, 3H), 1.31 (s, 3H), 1.33-1.42 (m, 2H), 1.52 (s, 3H), 1.68-1.73 (m, 2H), 1.98-2.02 (m, 1H), 2.03 (s, 3H), 2.05-2.13 (m, 3H), 2.63 (s, 1H), 3.08 (d, 1H,  $J = 4.4$  Hz), 4.83-4.85 (m, 1H), 5.06-5.08 (m, 2H), 5.16-5.17 (m, 1H), 5.33 (s, 1H), 5.96-5.97 (m, 1H);  $^{13}\text{C}$  NMR ( $\text{CDCl}_3$ , 125 MHz)  $\delta$  14.63, 15.14, 16.21, 21.42, 23.02, 23.42, 33.98, 35.13, 39.09, 41.95, 42.92, 62.68, 64.23, 65.31, 73.25, 112.02, 118.92, 121.18, 136.37, 137.06, 144.61, 170.45; IR (neat) 3495br, 2924, 1730, 1385, 1240  $\text{cm}^{-1}$ ; colorless oil;  $R_f = 0.25$  (3:1 hexanes/EtOAc).

#### Oxidation of epoxy alcohol **21**.

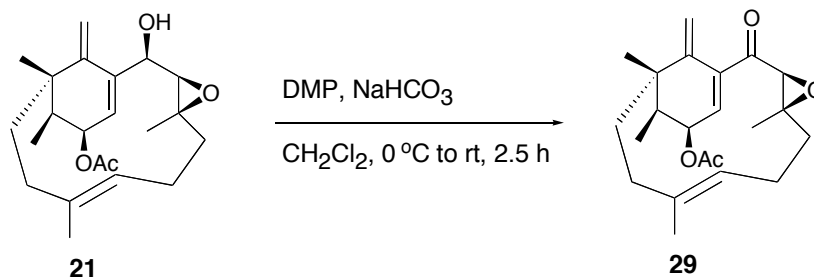

Freshly prepared DMP<sup>1</sup> (0.047 mmol, 20 mg) was added to a mixture of NaHCO<sub>3</sub> (0.189 mmol, 16 mg) and the epoxy alcohol **21** (8.5 mg, 0.0236 mmol) in 1 mL of dry CH<sub>2</sub>Cl<sub>2</sub> at 0 °C. The mixture was stirred at 0 °C for 30 minutes, and then allowed to warm to room temperature over 2.5 hours. The reaction was quenched with saturated aqueous NaHCO<sub>3</sub> (10 mL). The aqueous layer was extracted with Et<sub>2</sub>O (3 \* 10 mL). The combined organic layer was washed with brine (15 mL) and dried over Na<sub>2</sub>SO<sub>4</sub>. Filtration and concentration followed by flash chromatography on silica gel using 3:1 hexanes/EtOAc containing 1% Et<sub>3</sub>N as eluent provided epoxy ketone **29** (7.5 mg, 0.021 mmol, 89%).  $^1\text{H}$  NMR ( $\text{CDCl}_3$ , 500 MHz)  $\delta$  0.72 (d, 3H,  $J = 7.0$  Hz), 1.079 (s, 3H), 1.082 (s, 3H), 1.15-1.23 (m, 2H), 1.47-1.53 (m, 1H), 1.55 (s, 3H), 1.86-1.94 (m, 2H), 1.96-2.02 (m, 1H), 2.07 (s, 3H), 2.07-2.21 (m, 3H), 4.04 (s, 1H), 4.98 (t, 1H,  $J = 6.8$  Hz), 5.20 (s, 1H), 5.31 (s, 1H), 5.83 (dd, 1H,  $J = 5.9, 2.3$  Hz), 5.86-5.87 (m, 1H);  $^{13}\text{C}$  NMR ( $\text{CDCl}_3$ , 125 MHz)  $\delta$  9.16, 14.25, 16.82, 21.04, 22.22, 23.71, 32.30, 32.71, 38.23, 42.40, 45.85, 63.48, 65.18, 70.30, 116.76, 121.43, 129.92, 136.75, 142.80, 143.26, 170.50, 198.01.  $^1\text{H}$  NMR ( $\text{CD}_3\text{OD}$ , 500 MHz)  $\delta$  0.70 (d, 3H,  $J = 7.0$  Hz), 1.03 (d, 3H), 1.09 (s, 3H), 1.12-1.23 (m, 2H), 1.55 (s, 3H), 1.48-1.63 (m, 1H), 1.89-2.18 (m, 6H), 2.04 (s, 3H), 4.10 (s, 1H), 5.02 (t, 1H,  $J = 6.3$  Hz), 5.26 (s, 1H), 5.34 (s, 1H), 5.77-5.78 (m, 2H);  $^{13}\text{C}$  NMR ( $\text{CD}_3\text{OD}$ , 125 MHz)  $\delta$  9.46, 14.57, 16.74, 20.91, 22.58, 24.61, 33.52, 33.80, 39.01, 43.47, 46.98, 64.69, 66.66, 71.76, 117.86, 122.91, 131.23, 137.91, 144.14, 144.42, 172.04, 199.92. IR (neat) 2926, 1740, 1696, 1385, 1238, 1215, 1024  $\text{cm}^{-1}$ ; mass spectrum  $m/z$  (% rel intensity) 358 M<sup>+</sup> (0.05), 316 (2), 288 (1), 283 (2), 255 (2), 149 (17), 147 (26), 121 (24), 109 (22), 105 (21), 93 (17), 91 (29), 81 (24), 79 (20), 55 (23), 43 (100); HRMS (FAB) calcd for (C<sub>22</sub>H<sub>31</sub>O<sub>4</sub>)<sup>+</sup>  $m/z$  359.2223, meas 359.2222. Colorless oil;  $R_f = 0.21$  (3:1 hexanes/EtOAc).

## Oxidation of epoxy alcohol 20

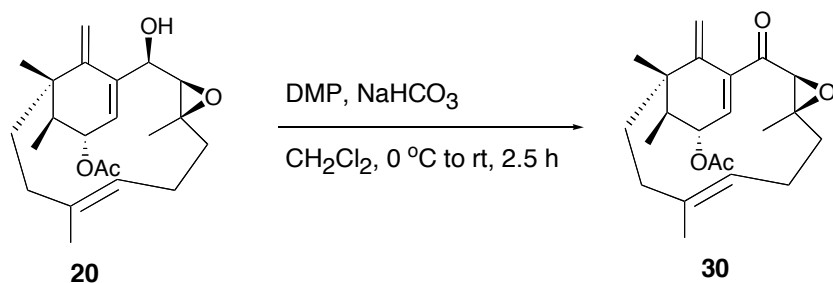

Freshly prepared DMP<sup>1</sup> (0.032 mmol, 13.4 mg) was added to a mixture of NaHCO<sub>3</sub> (10.6 mg, 0.126 mmol) and the epoxy alcohol **20** (5.7 mg, 0.0158 mmol) in 1 mL of dry CH<sub>2</sub>Cl<sub>2</sub> at 0 °C. The mixture was stirred at 0 °C for 30 minutes and then allowed to warm to room temperature over 2.5 hours. The reaction was quenched with saturated aqueous NaHCO<sub>3</sub> (5 mL). The aqueous layer was extracted with Et<sub>2</sub>O (3 \* 10 mL). The combined organic layer was washed with brine (15 mL) and dried over Na<sub>2</sub>SO<sub>4</sub>. Filtration and concentration followed by flash chromatography on silica gel using 3:1 hexanes/EtOAc containing 1% Et<sub>3</sub>N as eluent provided epoxy ketone **30** (5.0 mg, 0.014 mmol, 88%). The following spectral match those reported for the natural product.<sup>2</sup> The data for natural and synthetic **30** are presented in Table 1. <sup>1</sup>H NMR (CDCl<sub>3</sub>, 500 MHz) δ 0.81 (d, 3H, *J* = 7.3 Hz), 1.05 (s, 3H), 1.14 (s, 3H), 1.30-1.35 (m, 1H), 1.48-1.52 (m, 1H), 1.55 (s, 3H), 1.69-1.72 (m, 1H), 1.80 (br, 1H), 1.85-1.89 (m, 1H), 2.06-2.19 (m, 4H), 2.27-2.31 (m, 1H), 4.04 (s, 1H), 4.06 (s, 1H), 5.00 (t, 1H, *J* = 6.4 Hz), 5.26 (s, 1H), 5.27 (d, 1H, *J* = 1.5 Hz), 6.06 (d, 1H, *J* = 3.9 Hz); <sup>13</sup>C NMR (CDCl<sub>3</sub>, 125 MHz) δ 14.45, 14.95, 16.48, 23.00, 23.65, 33.55, 34.15, 37.61, 41.35, 45.44, 63.54, 64.68, 71.57, 116.74, 122.23, 131.92, 136.67, 141.47, 144.73, 199.61. <sup>1</sup>H NMR (CD<sub>3</sub>OD, 500 MHz) δ 0.76 (d, 3H, *J* = 7.3 Hz), 1.02 (s, 3H), 1.05 (s, 3H), 1.26-1.32 (m, 1H), 1.46-1.50 (m, 1H), 1.52 (s, 3H), 1.64-1.67 (m, 1H), 1.85-1.89 (m, 1H), 1.98-2.15 (m, 4H), 2.10-2.30 (m, 1H), 3.92 (t, 1H, *J* = 3.0 Hz), 4.06 (s, 1H), 5.01 (tq, 1H, *J* = 6.8 1.2 Hz), 5.19 (s, 1H), 5.27 (d, 1H, *J* = 1.6 Hz), 5.93 (d, 1H, *J* = 4.0 Hz); <sup>13</sup>C NMR (CD<sub>3</sub>OD, 125 MHz) δ 14.62, 15.35, 16.53, 23.70, 24.51, 34.66, 35.34, 38.34, 42.45, 45.90, 64.75, 66.14, 71.98, 117.04, 123.66, 134.28, 137.93, 142.42, 146.62, 201.82. IR (neat) 3477, 2919, 1688, 1381, 1217, 1009 cm<sup>-1</sup>; mass spectrum *m/z* (% rel intensity) 316 M<sup>+</sup> (0.4), 301 (2), 273 (3), 189 (16), 175 (17), 165 (71), 164 (28), 163 (24), 161 (20), 159 (17), 149 (55), 147 (34), 145 (20), 137 (20), 135 (45), 133 (35), 121 (56), 119 (38), 109 (43), 107 (41), 105 (49), 93 (53), 91 (81), 81 (56), 77 (48), 69 (26), 67 (48), 55 (74), 53 (48), 43 (100). HRMS (CI) calcd for (C<sub>20</sub>H<sub>28</sub>O<sub>3</sub>+Na)<sup>+</sup> *m/z* 339.1936, meas 339.1945. Colorless oil; R<sub>f</sub> = 0.31 (1:1 hexanes/EtOAc).

## Cleavage of Acetate 29.

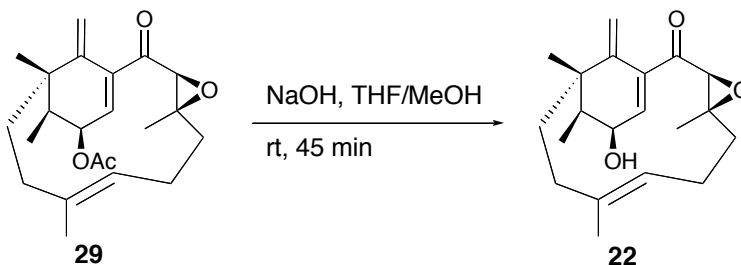

A solution of acetate **29** (7.5 mg, 0.0208 mmol) in 1.0 mL of 1:4 mixture of THF/MeOH containing 8.3 mg of NaOH (0.21 mmol) was stirred at room temperature for 45 minutes. The



reaction was then quenched with saturated aqueous  $\text{NH}_4\text{Cl}$ . The aqueous layer was extracted with  $\text{Et}_2\text{O}$  (3 \* 10 mL). The combined organic layer was washed with brine (15 mL) and dried over  $\text{Na}_2\text{SO}_4$ . Filtration and concentration followed by flash chromatography on silica gel with 1:1 hexanes/ $\text{EtOAc}$  containing 1%  $\text{Et}_3\text{N}$  as eluent provided the C-13-epimer of phomactin B2 **22** (5.9 mg, 0.0186 mmol, 90%) as a colorless oil.  $^1\text{H}$  NMR ( $\text{CDCl}_3$ , 500 MHz)  $\delta$  0.74 (d, 3H,  $J = 6.9$  Hz), 1.09 (s, 3H), 1.10 (s, 1H), 1.13-1.23 (m, 2H), 1.39-1.45 (m, 2H), 1.54 (s, 3H), 1.57 (br, 1H), 1.85-1.95 (m, 3H), 2.08-2.18 (m, 4H), 4.03 (s, 1H), 4.77 (s, 1H), 4.97-5.00 (m, 1H), 5.17 (s, 1H), 5.28 (s, 1H), 5.94 (s, 1H);  $^{13}\text{C}$  NMR ( $\text{CDCl}_3$ , 125 MHz)  $\delta$  8.15, 14.25, 16.77, 22.50, 23.74, 32.11, 32.64, 38.25, 44.98, 45.79, 63.34, 65.25, 67.72, 116.31, 121.34, 133.54, 136.79, 142.16, 143.67, 198.35.  $^1\text{H}$  NMR ( $\text{CD}_3\text{OD}$ , 500 MHz)  $\delta$  0.70 (d, 3H,  $J = 6.8$  Hz), 1.02 (s, 3H), 1.08 (s, 3H), 1.14-1.20 (m, 1H), 1.35 (s, 1H), 1.39-1.45 (m, 1H), 1.54 (s, 3H), 1.77-1.79 (m, 1H), 1.98-1.98 (m, 1H), 2.06-2.17 (m, 4H), 4.12 (s, 1H), 4.70 (dd, 1H,  $J = 5.8, 2.2$  Hz), 5.01 (t, 1H,  $J = 6.8$  Hz), 5.20 (s, 1H), 5.27 (s, 1H), 5.87 (t, 1H,  $J = 0.7$  Hz);  $^{13}\text{C}$  NMR ( $\text{CD}_3\text{OD}$ , 125 MHz)  $\delta$  8.84, 14.54, 16.70, 22.83, 24.66, 33.62, 33.84, 39.15, 46.55, 46.97, 64.59, 66.80, 67.87, 116.79, 122.88, 136.14, 138.08, 142.87, 145.32, 200.40; IR (neat) 3483, 2973, 2924, 1689, 1251, 1039, 887  $\text{cm}^{-1}$ ; mass spectrum  $m/z$  (% rel intensity) 316  $\text{M}^+$  (1), 301 (2), 189 (18), 175 (19), 165 (56), 164 (33), 163 (26), 161 (22), 149 (84), 147 (27), 145 (15), 137 (20), 135 (66), 121 (60), 109 (40), 107 (44), 105 (40), 93 (46), 91 (73), 81 (60), 69 (33), 67 (37), 55 (30), 43 (100). HRMS (FAB) calcd for  $(\text{C}_{20}\text{H}_{28}\text{O}_3+\text{H})^+$   $m/z$  317.2116, meas 317.2117. Colorless oil;  $R_f = 0.31$  (1:1 hexanes/ $\text{EtOAc}$ ).

### Cleavage of Acetate **30** and the Synthesis of Phomactin B2.

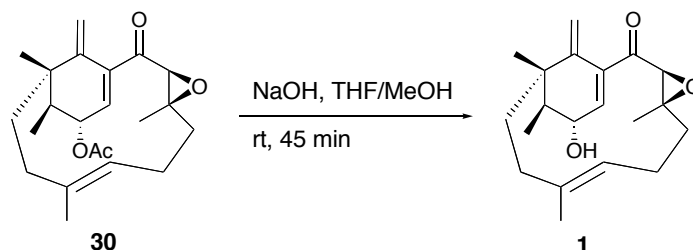

A solution of acetate **30** (6.5 mg, 0.018 mmol) in 1.0 mL of 1:4 mixture of THF/ $\text{MeOH}$  containing  $\text{NaOH}$  (8.4 mg, 0.21 mmol) was stirred at room temperature for 45 minutes. The reaction was quenched with saturated aqueous  $\text{NH}_4\text{Cl}$  (10 mL). The aqueous layer was extracted with  $\text{Et}_2\text{O}$  (3 \* 5 mL). The combined organic layer was washed with brine (10 mL) and dried over  $\text{Na}_2\text{SO}_4$ . Filtration and concentration followed by flash chromatography using 1:1 hexanes/ $\text{EtOAc}$  containing 1%  $\text{Et}_3\text{N}$  as eluent provided 5.4 mg of phomactin B2 **1** (0.017 mmol, 94%) as a colorless oil. The following spectral match those reported for the natural product.<sup>2</sup> The data for natural and synthetic Phomactin B2 are presented in Table 1.  $^1\text{H}$  NMR ( $\text{CDCl}_3$ , 500 MHz)  $\delta$  0.81 (d, 3H,  $J = 7.3$  Hz), 1.05 (s, 3H), 1.14 (s, 3H), 1.30-1.35 (m, 1H), 1.48-1.52 (m, 1H), 1.55 (s, 3H), 1.69-1.72 (m, 1H), 1.80 (br, 1H), 1.85-1.89 (m, 1H), 2.06-2.19 (m, 4H), 2.27-2.31 (m, 1H), 4.04 (s, 1H), 4.06 (s, 1H), 5.00 (t, 1H,  $J = 6.4$  Hz), 5.26 (s, 1H), 5.27 (d, 1H,  $J = 1.5$  Hz), 6.06 (d, 1H,  $J = 3.9$  Hz);  $^{13}\text{C}$  NMR ( $\text{CDCl}_3$ , 125 MHz)  $\delta$  14.45, 14.95, 16.48, 23.00, 23.65, 33.55, 34.15, 37.61, 41.35, 45.44, 63.54, 64.68, 71.57, 116.74, 122.23, 131.92, 136.67, 141.47, 144.73, 199.61.  $^1\text{H}$  NMR ( $\text{CD}_3\text{OD}$ , 500 MHz)  $\delta$  0.76 (d, 3H,  $J = 7.3$  Hz), 1.02 (s, 3H), 1.05 (s, 3H), 1.26-1.32 (m, 1H), 1.46-1.50 (m, 1H), 1.52 (s, 3H), 1.64-1.67 (m, 1H), 1.85-1.89 (m, 1H), 1.98-2.15 (m, 4H), 2.10-2.30 (m, 1H), 3.92 (t, 1H,  $J = 3.0$  Hz), 4.06 (s, 1H), 5.01 (tq, 1H,  $J = 6.8, 1.2$  Hz), 5.19 (s, 1H), 5.27 (d, 1H,  $J = 1.6$  Hz), 5.93 (d, 1H,  $J = 4.0$  Hz);  $^{13}\text{C}$  NMR ( $\text{CD}_3\text{OD}$ , 125 MHz)  $\delta$  14.62, 15.35, 16.53, 23.70, 24.51, 34.66, 35.34, 38.34, 42.45, 45.90, 64.75, 66.14, 71.98, 117.04, 123.66, 134.28, 137.93, 142.42, 146.62, 201.82. IR (neat) 3477, 2919, 1688, 1381, 1217, 1009  $\text{cm}^{-1}$ ; mass spectrum  $m/z$  (% rel intensity) 316  $\text{M}^+$  (0.4), 301 (2), 273 (3), 189 (16), 175 (17), 165 (71), 164

(28), 163 (24), 161 (20), 159 (17), 149 (55), 147 (34), 145 (20), 137 (20), 135 (45), 133 (35), 121 (56), 119 (38), 109 (43), 107 (41), 105 (49), 93 (53), 91 (81), 81 (56), 77 (48), 69 (26), 67 (48), 55 (74), 53 (48), 43 (100). HRMS (CI) calcd for  $(C_{20}H_{28}O_3+Na)^+$   $m/z$  339.1936, meas 339.1945. Colorless oil;  $R_f$  = 0.31 (1:1 hexanes/EtOAc).

### Mitsunobu Inversion of Alcohol **22**.

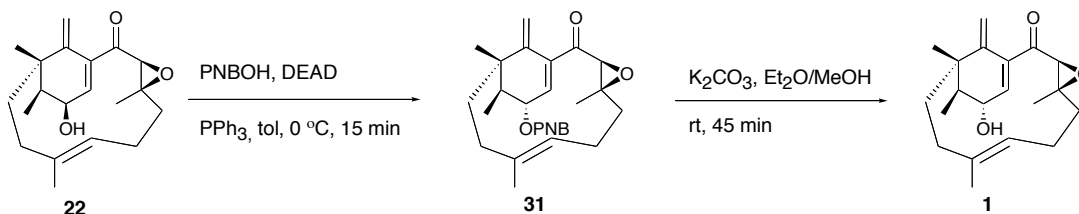

To a solution of *para*-nitrobenzoic acid (6.2 mg, 0.037 mmol), C13-epimer **22** (5.9 mg, 0.0187 mmol) and  $PPh_3$  (9.8 mg, 0.037 mmol) in 0.9 mL of toluene at 0 °C was added DEAD (5.9  $\mu$ L, 0.037 mmol) dropwise. The reaction mixture was stirred at 0 °C for 15 minutes, and then quenched with saturated aqueous  $NaHCO_3$  (5 mL). The aqueous layer was extracted with  $Et_2O$  (3 \* 5 mL). The combined organic layer was washed with brine (10 mL) and dried over  $Na_2SO_4$ . Filtration and concentration followed by flash chromatography using 3:1 hexanes/EtOAc as eluent provided ester **31** (7.0 mg, 0.015 mmol, 81%) as a yellow oil.  $^1H$  NMR ( $CDCl_3$ , 500 MHz)  $\delta$  0.92 (d, 3H,  $J$  = 7.3 Hz), 1.11 (s, 3H), 1.12 (s, 3H), 1.21-1.25 (m, 1H), 1.37-1.44 (m, 1H), 1.59 (s, 3H), 1.86-1.92 (m, 2H), 2.15-2.22 (m, 4H), 2.38-2.41 (m, 1H), 4.07 (s, 1H), 5.04-5.05 (m, 1H), 5.36 (d, 1H,  $J$  = 4.7 Hz), 5.38 (s, 1H), 5.43 (s, 1H), 6.11 (d, 1H,  $J$  = 4.6 Hz), 8.16 (d, 2H,  $J$  = 9.0 Hz), 8.29 (d, 2H,  $J$  = 9.0 Hz);  $^{13}C$  NMR ( $CDCl_3$ , 125 MHz)  $\delta$  14.41, 14.61, 16.41, 22.01, 23.88, 33.31, 33.94, 38.19, 41.58, 43.83, 63.83, 64.80, 74.49, 118.73, 122.14, 123.72, 126.83, 130.62, 135.45, 136.50, 143.26, 143.86, 150.65, 163.66, 198.61; IR (neat) 2926, 1722, 1690, 15530, 1271, 1101, 720  $cm^{-1}$ . HRMS (CI) calcd for  $(C_{27}H_{31}NO_6+H)^+$   $m/z$  466.2243, meas 466.2237. Colorless oil;  $R_f$  = 0.41 (33% EtOAc in hexanes).

### Cleavage of PNB ester **31**.

To a solution of PNB-ester **31** (5.0 mg, 0.0108 mmol) in 0.5 mL of MeOH/ $Et_2O$  (2:1) at room temperature was added  $K_2CO_3$  (7.4 mg, 0.054 mmol) as a powder. The reaction mixture was stirred at room temperature until all of the starting material was consumed, and then quenched with saturated aqueous  $NH_4Cl$  (5 mL). The aqueous layer was extracted with  $Et_2O$  (3 \* 5 mL). The combined organic layer was washed with brine (10 mL) and dried over  $Na_2SO_4$ . Filtration and concentration followed by flash chromatography using 1:1 hexanes/EtOAc as eluent provided phomactin B2 **1** (2.9 mg, 0.0092 mmol, 85%) as a colorless oil.

**Table 1. <sup>13</sup>C NMR Chemical Shifts of Phomactin B2 (1) and Compound 30 (CD<sub>3</sub>OD)**

| Phomactin B2 (1) |                 | Compound 30   |                 |
|------------------|-----------------|---------------|-----------------|
| Natural (ppm)    | Synthetic (ppm) | Natural (ppm) | Synthetic (ppm) |
| 14.7             | 14.62           | 14.8          | 14.74           |
| 15.4             | 15.35           | 14.8          | 14.77           |
| 16.6             | 16.53           | 16.4          | 16.38           |
| 23.8             | 23.70           | 21.1          | 21.06           |
| 24.5             | 24.51           | 22.7          | 22.63           |
| 34.7             | 34.66           | 24.7          | 24.69           |
| 35.3             | 35.34           | 34.5          | 34.54           |
| 38.4             | 38.34           | 35.1          | 35.06           |
| 42.4             | 42.45           | 38.9          | 38.93           |
| 45.9             | 45.90           | 42.7          | 42.93           |
| 64.7             | 64.75           | 44.5          | 44.56           |
| 66.1             | 66.14           | 64.9          | 64.93           |
| 72.0             | 71.98           | 66.3          | 66.33           |
| 117.0            | 117.04          | 74.4          | 74.43           |
| 123.7            | 123.66          | 119.0         | 118.99          |
| 134.3            | 134.28          | 123.4         | 123.39          |
| 137.9            | 137.93          | 129.2         | 129.22          |
| 142.4            | 142.42          | 137.9         | 137.91          |
| 146.6            | 146.62          | 144.6         | 144.63          |
| 201.8            | 201.82          | 145.0         | 145.06          |
|                  |                 | 171.8         | 171.83          |
|                  |                 | 200.7         | 200.84          |

## References:

- 1) Dess, D. B.; Martin, J. C. *J. Org. Chem.* **1983**, *48*, 4155.
- 2) Sugano, M.; Sato, A.; Iijima, Y.; Furuya, K.; Haruyama, H.; Yoda, K.; Hata, T.; *J. Org. Chem.* **1994**, *59*, 564.

## **APPENDIX A**

### **Crystal Structure of the Major Alcohol 2c.**

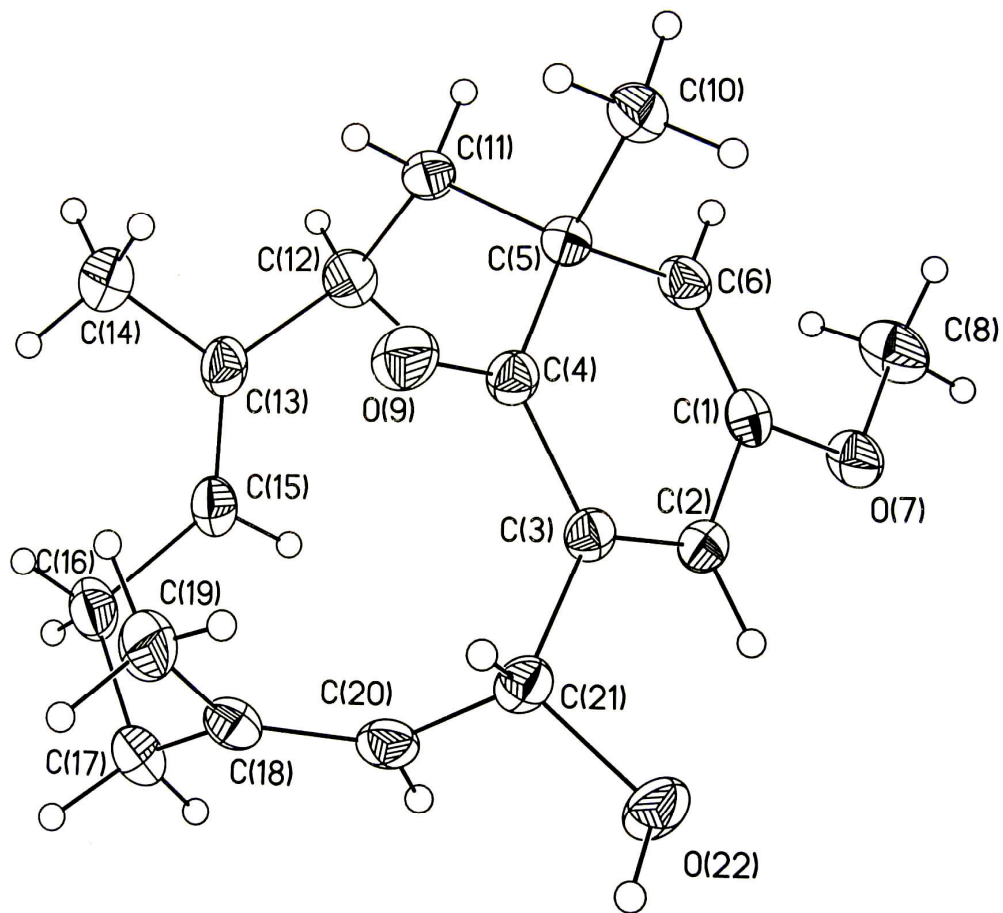

Figure 1. ORTEP for the Major Alcohol 2c.

Table 1. Crystal data and structure refinement for **2c**.

|                                   |                                                                                                                                   |
|-----------------------------------|-----------------------------------------------------------------------------------------------------------------------------------|
| Identification code               | p-1                                                                                                                               |
| Empirical formula                 | C <sub>19</sub> H <sub>26</sub> O <sub>3</sub>                                                                                    |
| Formula weight                    | 302.40                                                                                                                            |
| Temperature                       | 173(2) K                                                                                                                          |
| Wavelength                        | 0.71073 Å                                                                                                                         |
| Crystal system                    | Triclinic                                                                                                                         |
| Space group                       | P-1                                                                                                                               |
| Unit cell dimensions              | a = 6.4091(13) Å<br>b = 14.590(3) Å<br>c = 18.406(4) Å<br>alpha = 90.37(3) deg.<br>beta = 94.69(3) deg.<br>gamma = 100.75(3) deg. |
| Volume                            | 1684.9(6) Å <sup>3</sup>                                                                                                          |
| Z                                 | 4                                                                                                                                 |
| Density (calculated)              | 1.192 Mg/m <sup>3</sup>                                                                                                           |
| Absorption coefficient            | 0.079 mm <sup>-1</sup>                                                                                                            |
| F(000)                            | 656                                                                                                                               |
| Crystal size                      | 1.4 x 1.2 x 0.5 mm                                                                                                                |
| Theta range for data collection   | 1.78 to 28.31 deg.                                                                                                                |
| Index ranges                      | -8<=h<=8, -19<=k<=19, -24<=l<=23                                                                                                  |
| Reflections collected / unique    | 20386 / 7977 [R(int) = 0.0315]                                                                                                    |
| Completeness to theta = 28.31     | 94.9%                                                                                                                             |
| Refinement method                 | Full-matrix least-squares on F <sup>2</sup>                                                                                       |
| Data / restraints / parameters    | 7977 / 0 / 405                                                                                                                    |
| Goodness-of-fit on F <sup>2</sup> | 1.093                                                                                                                             |
| Final R indices [I>2sigma(I)]     | R1 = 0.0514, wR2 = 0.1508                                                                                                         |
| R indices (all data)              | R1 = 0.0620, wR2 = 0.1559                                                                                                         |
| Largest diff. peak and hole       | 0.556 and -0.311 e.Å <sup>-3</sup>                                                                                                |

Table 2. Atomic coordinates (x 10<sup>4</sup>), equivalent isotropic displacement parameters (Å<sup>2</sup> x 10<sup>3</sup>), and occupancies for **2c**.

|       | x       | y       | z        | U(eq) | Occ. |
|-------|---------|---------|----------|-------|------|
| C(1)  | 2902(2) | 4041(1) | 294(1)   | 22(1) | 1    |
| C(2)  | 2480(2) | 4148(1) | -485(1)  | 22(1) | 1    |
| C(3)  | 3210(2) | 3642(1) | -983(1)  | 20(1) | 1    |
| C(4)  | 4546(2) | 2961(1) | -746(1)  | 21(1) | 1    |
| C(5)  | 5065(2) | 2839(1) | 69(1)    | 22(1) | 1    |
| C(6)  | 4041(2) | 3420(1) | 557(1)   | 24(1) | 1    |
| O(7)  | 1991(2) | 4634(1) | 691(1)   | 28(1) | 1    |
| C(8)  | 2241(3) | 4553(1) | 1462(1)  | 37(1) | 1    |
| O(9)  | 5300(2) | 2517(1) | -1191(1) | 32(1) | 1    |
| C(10) | 7507(2) | 3150(1) | 206(1)   | 30(1) | 1    |
| C(11) | 4479(2) | 1793(1) | 255(1)   | 26(1) | 1    |
| C(12) | 2113(2) | 1329(1) | 124(1)   | 29(1) | 1    |

|        |          |         |          |       |   |
|--------|----------|---------|----------|-------|---|
| C(13)  | 1398(2)  | 889(1)  | -625(1)  | 26(1) | 1 |
| C(14)  | 2684(3)  | 194(1)  | -862(1)  | 42(1) | 1 |
| C(15)  | -329(2)  | 1069(1) | -1006(1) | 26(1) | 1 |
| C(16)  | -1290(2) | 666(1)  | -1740(1) | 32(1) | 1 |
| C(17)  | -1575(2) | 1439(1) | -2286(1) | 32(1) | 1 |
| C(18)  | 484(2)   | 2139(1) | -2301(1) | 27(1) | 1 |
| C(19)  | 2306(2)  | 1781(1) | -2597(1) | 33(1) | 1 |
| C(20)  | 641(2)   | 2977(1) | -1981(1) | 25(1) | 1 |
| C(21)  | 2620(2)  | 3700(1) | -1793(1) | 23(1) | 1 |
| O(22)  | 2234(2)  | 4620(1) | -1936(1) | 31(1) | 1 |
| C(1A)  | 2206(2)  | 6079(1) | -5577(1) | 22(1) | 1 |
| C(2A)  | 2426(2)  | 5816(1) | -4817(1) | 22(1) | 1 |
| C(3A)  | 1598(2)  | 6227(1) | -4287(1) | 20(1) | 1 |
| C(4A)  | 396(2)   | 6980(1) | -4461(1) | 22(1) | 1 |
| C(5A)  | 100(2)   | 7267(1) | -5256(1) | 24(1) | 1 |
| C(6A)  | 1199(2)  | 6770(1) | -5784(1) | 25(1) | 1 |
| O(7A)  | 3147(2)  | 5539(1) | -6014(1) | 28(1) | 1 |
| C(8A)  | 3201(2)  | 5785(1) | -6763(1) | 36(1) | 1 |
| O(9A)  | -420(2)  | 7349(1) | -3989(1) | 33(1) | 1 |
| C(10A) | -2329(2) | 7017(1) | -5471(1) | 33(1) | 1 |
| C(11A) | 787(2)   | 8338(1) | -5312(1) | 30(1) | 1 |
| C(12A) | 3135(2)  | 8752(1) | -5082(1) | 32(1) | 1 |
| C(13A) | 3691(2)  | 9002(1) | -4280(1) | 31(1) | 1 |
| C(14A) | 2366(3)  | 9635(1) | -3967(1) | 51(1) | 1 |
| C(15A) | 5329(2)  | 8724(1) | -3909(1) | 30(1) | 1 |
| C(16A) | 6145(3)  | 8942(1) | -3123(1) | 37(1) | 1 |
| C(17A) | 6284(2)  | 8051(1) | -2686(1) | 37(1) | 1 |
| C(18A) | 4179(2)  | 7376(1) | -2768(1) | 30(1) | 1 |
| C(19A) | 2357(3)  | 7676(1) | -2420(1) | 41(1) | 1 |
| C(20A) | 3987(2)  | 6623(1) | -3198(1) | 26(1) | 1 |
| C(21A) | 1969(2)  | 5994(1) | -3491(1) | 24(1) | 1 |
| O(22A) | 2262(2)  | 5041(1) | -3418(1) | 29(1) | 1 |

U(eq) is defined as one third of the trace of the orthogonalized Uij tensor.

Table 3. Bond lengths [Å] and angles [deg] for **2c**.

---

|             |            |
|-------------|------------|
| C(1)-C(6)   | 1.3345(19) |
| C(1)-O(7)   | 1.3687(15) |
| C(1)-C(2)   | 1.4529(17) |
| C(2)-C(3)   | 1.3392(17) |
| C(3)-C(4)   | 1.4734(17) |
| C(3)-C(21)  | 1.5159(17) |
| C(4)-O(9)   | 1.2238(16) |
| C(4)-C(5)   | 1.5282(17) |
| C(5)-C(6)   | 1.5006(18) |
| C(5)-C(10)  | 1.5455(19) |
| C(5)-C(11)  | 1.5495(18) |
| O(7)-C(8)   | 1.4232(17) |
| C(11)-C(12) | 1.540(2)   |
| C(12)-C(13) | 1.516(2)   |
| C(13)-C(15) | 1.331(2)   |

|               |            |
|---------------|------------|
| C(13)-C(14)   | 1.503(2)   |
| C(15)-C(16)   | 1.506(2)   |
| C(16)-C(17)   | 1.541(2)   |
| C(17)-C(18)   | 1.513(2)   |
| C(18)-C(20)   | 1.3361(19) |
| C(18)-C(19)   | 1.505(2)   |
| C(20)-C(21)   | 1.5047(19) |
| C(21)-O(22)   | 1.4330(15) |
| C(1A)-C(6A)   | 1.3346(19) |
| C(1A)-O(7A)   | 1.3708(15) |
| C(1A)-C(2A)   | 1.4566(17) |
| C(2A)-C(3A)   | 1.3376(18) |
| C(3A)-C(4A)   | 1.4788(18) |
| C(3A)-C(21A)  | 1.5154(17) |
| C(4A)-O(9A)   | 1.2214(16) |
| C(4A)-C(5A)   | 1.5310(18) |
| C(5A)-C(6A)   | 1.5025(18) |
| C(5A)-C(11A)  | 1.5489(19) |
| C(5A)-C(10A)  | 1.5490(19) |
| O(7A)-C(8A)   | 1.4290(17) |
| C(11A)-C(12A) | 1.537(2)   |
| C(12A)-C(13A) | 1.515(2)   |
| C(13A)-C(15A) | 1.334(2)   |
| C(13A)-C(14A) | 1.507(2)   |
| C(15A)-C(16A) | 1.508(2)   |
| C(16A)-C(17A) | 1.546(2)   |
| C(17A)-C(18A) | 1.510(2)   |
| C(18A)-C(20A) | 1.331(2)   |
| C(18A)-C(19A) | 1.508(2)   |
| C(20A)-C(21A) | 1.497(2)   |
| C(21A)-O(22A) | 1.4433(16) |

|                   |            |
|-------------------|------------|
| C(6)-C(1)-O(7)    | 126.72(12) |
| C(6)-C(1)-C(2)    | 121.43(12) |
| O(7)-C(1)-C(2)    | 111.86(11) |
| C(3)-C(2)-C(1)    | 122.67(12) |
| C(2)-C(3)-C(4)    | 119.88(12) |
| C(2)-C(3)-C(21)   | 122.48(11) |
| C(4)-C(3)-C(21)   | 117.56(11) |
| O(9)-C(4)-C(3)    | 121.04(12) |
| O(9)-C(4)-C(5)    | 119.71(11) |
| C(3)-C(4)-C(5)    | 119.21(11) |
| C(6)-C(5)-C(4)    | 114.53(10) |
| C(6)-C(5)-C(10)   | 107.88(11) |
| C(4)-C(5)-C(10)   | 105.75(11) |
| C(6)-C(5)-C(11)   | 110.48(11) |
| C(4)-C(5)-C(11)   | 109.62(11) |
| C(10)-C(5)-C(11)  | 108.30(11) |
| C(1)-C(6)-C(5)    | 122.13(12) |
| C(1)-O(7)-C(8)    | 116.01(11) |
| C(12)-C(11)-C(5)  | 116.78(11) |
| C(13)-C(12)-C(11) | 116.34(12) |
| C(15)-C(13)-C(14) | 123.96(13) |



|                      |            |
|----------------------|------------|
| C(15)-C(13)-C(12)    | 121.13(13) |
| C(14)-C(13)-C(12)    | 114.75(13) |
| C(13)-C(15)-C(16)    | 127.74(13) |
| C(15)-C(16)-C(17)    | 111.56(12) |
| C(18)-C(17)-C(16)    | 110.33(12) |
| C(20)-C(18)-C(19)    | 124.69(14) |
| C(20)-C(18)-C(17)    | 119.02(13) |
| C(19)-C(18)-C(17)    | 115.82(12) |
| C(18)-C(20)-C(21)    | 128.09(13) |
| O(22)-C(21)-C(20)    | 111.08(11) |
| O(22)-C(21)-C(3)     | 108.04(10) |
| C(20)-C(21)-C(3)     | 107.27(10) |
| C(6A)-C(1A)-O(7A)    | 127.23(12) |
| C(6A)-C(1A)-C(2A)    | 121.45(12) |
| O(7A)-C(1A)-C(2A)    | 111.32(11) |
| C(3A)-C(2A)-C(1A)    | 122.70(12) |
| C(2A)-C(3A)-C(4A)    | 120.12(12) |
| C(2A)-C(3A)-C(21A)   | 122.23(11) |
| C(4A)-C(3A)-C(21A)   | 117.52(11) |
| O(9A)-C(4A)-C(3A)    | 121.22(12) |
| O(9A)-C(4A)-C(5A)    | 120.03(11) |
| C(3A)-C(4A)-C(5A)    | 118.70(11) |
| C(6A)-C(5A)-C(4A)    | 114.91(11) |
| C(6A)-C(5A)-C(11A)   | 110.60(11) |
| C(4A)-C(5A)-C(11A)   | 109.88(11) |
| C(6A)-C(5A)-C(10A)   | 107.96(11) |
| C(4A)-C(5A)-C(10A)   | 105.52(11) |
| C(11A)-C(5A)-C(10A)  | 107.59(11) |
| C(1A)-C(6A)-C(5A)    | 121.93(12) |
| C(1A)-O(7A)-C(8A)    | 116.56(11) |
| C(12A)-C(11A)-C(5A)  | 116.67(12) |
| C(13A)-C(12A)-C(11A) | 116.52(13) |
| C(15A)-C(13A)-C(14A) | 123.93(14) |
| C(15A)-C(13A)-C(12A) | 121.15(13) |
| C(14A)-C(13A)-C(12A) | 114.77(14) |
| C(13A)-C(15A)-C(16A) | 127.86(14) |
| C(15A)-C(16A)-C(17A) | 112.29(12) |
| C(18A)-C(17A)-C(16A) | 110.57(13) |
| C(20A)-C(18A)-C(19A) | 124.46(14) |
| C(20A)-C(18A)-C(17A) | 119.01(13) |
| C(19A)-C(18A)-C(17A) | 116.12(13) |
| C(18A)-C(20A)-C(21A) | 127.40(13) |
| O(22A)-C(21A)-C(20A) | 108.20(11) |
| O(22A)-C(21A)-C(3A)  | 110.72(10) |
| C(20A)-C(21A)-C(3A)  | 106.78(11) |

---

Symmetry transformations used to generate equivalent atoms:

Table 4. Anisotropic displacement parameters ( $\text{Å}^2 \times 10^3$ ) for **2c**.

|        | U11   | U22   | U33   | U23    | U13   | U12   |
|--------|-------|-------|-------|--------|-------|-------|
| C(1)   | 22(1) | 21(1) | 20(1) | -4(1)  | 3(1)  | 1(1)  |
| C(2)   | 24(1) | 19(1) | 21(1) | 1(1)   | 1(1)  | 4(1)  |
| C(3)   | 22(1) | 17(1) | 18(1) | 3(1)   | 3(1)  | 2(1)  |
| C(4)   | 22(1) | 19(1) | 22(1) | 1(1)   | 2(1)  | 3(1)  |
| C(5)   | 25(1) | 21(1) | 21(1) | 0(1)   | -2(1) | 5(1)  |
| C(6)   | 28(1) | 26(1) | 17(1) | -1(1)  | -1(1) | 3(1)  |
| O(7)   | 31(1) | 33(1) | 21(1) | -8(1)  | 2(1)  | 11(1) |
| C(8)   | 41(1) | 54(1) | 19(1) | -9(1)  | 2(1)  | 13(1) |
| O(9)   | 38(1) | 36(1) | 26(1) | -2(1)  | 4(1)  | 18(1) |
| C(10)  | 25(1) | 30(1) | 34(1) | -4(1)  | -3(1) | 4(1)  |
| C(11)  | 34(1) | 21(1) | 24(1) | 4(1)   | -6(1) | 6(1)  |
| C(12)  | 36(1) | 24(1) | 23(1) | 6(1)   | 1(1)  | 0(1)  |
| C(13)  | 32(1) | 18(1) | 28(1) | 1(1)   | 3(1)  | 0(1)  |
| C(14)  | 45(1) | 34(1) | 48(1) | -10(1) | -8(1) | 16(1) |
| C(15)  | 31(1) | 21(1) | 25(1) | -2(1)  | 3(1)  | 1(1)  |
| C(16)  | 35(1) | 28(1) | 31(1) | -6(1)  | -2(1) | 1(1)  |
| C(17)  | 34(1) | 34(1) | 27(1) | -7(1)  | -7(1) | 6(1)  |
| C(18)  | 35(1) | 31(1) | 15(1) | 1(1)   | -2(1) | 9(1)  |
| C(19)  | 43(1) | 33(1) | 23(1) | -5(1)  | 4(1)  | 11(1) |
| C(20)  | 30(1) | 29(1) | 16(1) | 4(1)   | 0(1)  | 10(1) |
| C(21)  | 33(1) | 22(1) | 17(1) | 4(1)   | 6(1)  | 8(1)  |
| O(22)  | 50(1) | 23(1) | 21(1) | 7(1)   | 6(1)  | 12(1) |
| C(1A)  | 21(1) | 23(1) | 18(1) | -4(1)  | 2(1)  | 1(1)  |
| C(2A)  | 24(1) | 20(1) | 21(1) | 2(1)   | 1(1)  | 3(1)  |
| C(3A)  | 21(1) | 20(1) | 18(1) | 3(1)   | 1(1)  | 1(1)  |
| C(4A)  | 22(1) | 22(1) | 22(1) | 0(1)   | 1(1)  | 3(1)  |
| C(5A)  | 27(1) | 23(1) | 22(1) | 0(1)   | -2(1) | 6(1)  |
| C(6A)  | 28(1) | 27(1) | 17(1) | 2(1)   | 0(1)  | 2(1)  |
| O(7A)  | 32(1) | 35(1) | 20(1) | -4(1)  | 6(1)  | 9(1)  |
| C(8A)  | 33(1) | 56(1) | 18(1) | -3(1)  | 5(1)  | 10(1) |
| O(9A)  | 38(1) | 38(1) | 27(1) | -3(1)  | 5(1)  | 17(1) |
| C(10A) | 28(1) | 36(1) | 35(1) | -3(1)  | -5(1) | 8(1)  |
| C(11A) | 38(1) | 23(1) | 30(1) | 4(1)   | -5(1) | 8(1)  |
| C(12A) | 38(1) | 23(1) | 32(1) | 5(1)   | 2(1)  | 2(1)  |
| C(13A) | 35(1) | 19(1) | 36(1) | -4(1)  | 3(1)  | 1(1)  |
| C(14A) | 56(1) | 42(1) | 60(1) | -19(1) | -6(1) | 23(1) |
| C(15A) | 33(1) | 24(1) | 31(1) | -6(1)  | 3(1)  | 0(1)  |
| C(16A) | 38(1) | 34(1) | 36(1) | -12(1) | -2(1) | -1(1) |
| C(17A) | 37(1) | 44(1) | 25(1) | -10(1) | -6(1) | 3(1)  |
| C(18A) | 34(1) | 38(1) | 17(1) | 0(1)   | -2(1) | 5(1)  |
| C(19A) | 42(1) | 53(1) | 26(1) | -14(1) | 4(1)  | 6(1)  |
| C(20A) | 29(1) | 32(1) | 18(1) | 4(1)   | 1(1)  | 7(1)  |
| C(21A) | 31(1) | 24(1) | 16(1) | 4(1)   | 4(1)  | 6(1)  |
| O(22A) | 39(1) | 24(1) | 22(1) | 7(1)   | 1(1)  | 5(1)  |

The anisotropic displacement factor exponent takes the form:  
 $-2 \pi^2 [ h^2 a^{*2} U_{11} + \dots + 2 h k a^* b^* U_{12} ]$

Table 5. Hydrogen coordinates ( $\times 10^4$ ), isotropic displacement parameters ( $\text{\AA}^2 \times 10^3$ ), and occupancies for **2c**.

|        | x        | y        | z         | U(eq) | Occ. |
|--------|----------|----------|-----------|-------|------|
| H(2A)  | 1669     | 4585     | -645      | 26    | 1    |
| H(6A)  | 4205     | 3345     | 1058      | 29    | 1    |
| H(8A)  | 1554     | 4998     | 1689      | 56    | 1    |
| H(8B)  | 3731     | 4673     | 1625      | 56    | 1    |
| H(8C)  | 1607     | 3934     | 1594      | 56    | 1    |
| H(10A) | 7901     | 3798     | 93        | 45    | 1    |
| H(10B) | 8201     | 2784     | -98       | 45    | 1    |
| H(10C) | 7937     | 3062     | 709       | 45    | 1    |
| H(11A) | 5299     | 1450     | -29       | 32    | 1    |
| H(11B) | 4930     | 1727     | 765       | 32    | 1    |
| H(12A) | 1807     | 851      | 484       | 34    | 1    |
| H(12B) | 1257     | 1796     | 209       | 34    | 1    |
| H(14A) | 2129     | -52      | -1339     | 63    | 1    |
| H(14B) | 2600     | -305     | -523      | 63    | 1    |
| H(14C) | 4144     | 497      | -877      | 63    | 1    |
| H(15A) | -1025    | 1494     | -794      | 32    | 1    |
| H(16A) | -2666    | 275      | -1686     | 38    | 1    |
| H(16B) | -376     | 278      | -1930     | 38    | 1    |
| H(17A) | -1995    | 1163     | -2770     | 39    | 1    |
| H(17B) | -2694    | 1753     | -2147     | 39    | 1    |
| H(19A) | 3531     | 2275     | -2584     | 49    | 1    |
| H(19B) | 1909     | 1562     | -3091     | 49    | 1    |
| H(19C) | 2642     | 1277     | -2305     | 49    | 1    |
| H(20A) | -631     | 3133     | -1860     | 30    | 1    |
| H(21A) | 3782     | 3573     | -2070     | 28    | 1    |
| H(22A) | 2290(30) | 4731(14) | -2432(11) | 47(5) | 1    |
| H(2AA) | 3173     | 5342     | -4695     | 26    | 1    |
| H(6AA) | 1177     | 6948     | -6268     | 30    | 1    |
| H(8AA) | 3887     | 5362     | -7016     | 53    | 1    |
| H(8AB) | 3982     | 6410     | -6797     | 53    | 1    |
| H(8AC) | 1773     | 5748     | -6979     | 53    | 1    |
| H(10D) | -2804    | 6356     | -5439     | 49    | 1    |
| H(10E) | -2625    | 7206     | -5961     | 49    | 1    |
| H(10F) | -3065    | 7335     | -5145     | 49    | 1    |
| H(11C) | 480      | 8505     | -5813     | 36    | 1    |
| H(11D) | -92      | 8633     | -5015     | 36    | 1    |
| H(12C) | 3994     | 8307     | -5218     | 38    | 1    |
| H(12D) | 3543     | 9310     | -5359     | 38    | 1    |
| H(14D) | 2820     | 9760     | -3461     | 77    | 1    |
| H(14E) | 893      | 9337     | -4017     | 77    | 1    |
| H(14F) | 2543     | 10211    | -4225     | 77    | 1    |
| H(15B) | 6056     | 8350     | -4166     | 36    | 1    |
| H(16C) | 5205     | 9287     | -2898     | 44    | 1    |
| H(16D) | 7548     | 9335     | -3105     | 44    | 1    |
| H(17C) | 7390     | 7755     | -2859     | 44    | 1    |
| H(17D) | 6661     | 8218     | -2175     | 44    | 1    |

|        |          |          |           |       |   |
|--------|----------|----------|-----------|-------|---|
| H(19D) | 1101     | 7201     | -2504     | 61    | 1 |
| H(19E) | 2093     | 8249     | -2628     | 61    | 1 |
| H(19F) | 2719     | 7768     | -1904     | 61    | 1 |
| H(20B) | 5250     | 6469     | -3331     | 31    | 1 |
| H(21B) | 774      | 6100     | -3222     | 28    | 1 |
| H(22B) | 1120(40) | 4629(17) | -3697(14) | 77(7) | 1 |

---

## **APPENDIX B**

### **Crystal Structure of the Minor TIPS Ether 15a.**

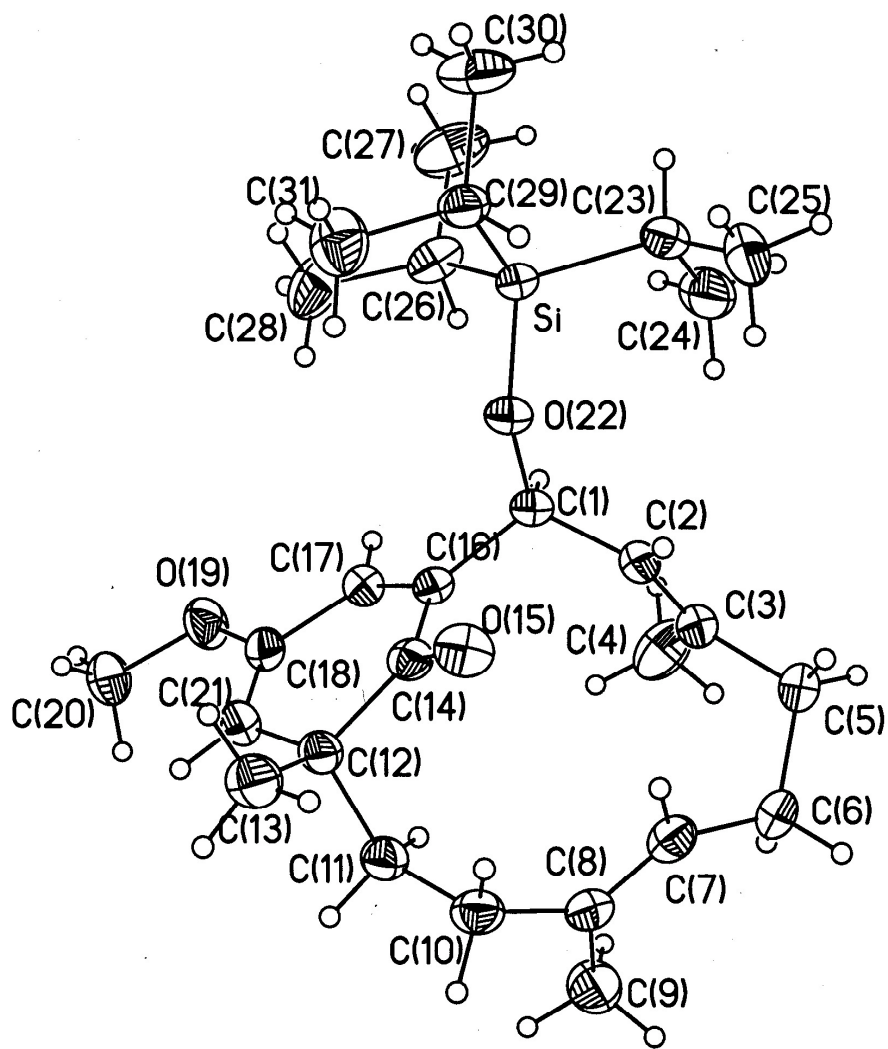

Figure 2. ORTEP for the Minor TIPS Ether 15a.

Table 1. Crystal data and structure refinement for **15a**.

---

|                                   |                                                                                                                      |
|-----------------------------------|----------------------------------------------------------------------------------------------------------------------|
| Identification code               | wulff07                                                                                                              |
| Empirical formula                 | C <sub>28</sub> H <sub>46</sub> O <sub>3</sub> Si                                                                    |
| Formula weight                    | 458.74                                                                                                               |
| Temperature                       | 173(2) K                                                                                                             |
| Wavelength                        | 0.71073 Å                                                                                                            |
| Crystal system                    | Monoclinic                                                                                                           |
| Space group                       | P2(1)/c                                                                                                              |
| Unit cell dimensions              | a = 12.384(3) Å<br>b = 12.584(3) Å<br>c = 18.686(4) Å<br>alpha = 90 deg.<br>beta = 107.07(3) deg.<br>gamma = 90 deg. |
| Volume                            | 2783.9(10) Å <sup>3</sup>                                                                                            |
| Z                                 | 4                                                                                                                    |
| Density (calculated)              | 1.095 Mg/m <sup>3</sup>                                                                                              |
| Absorption coefficient            | 0.109 mm <sup>-1</sup>                                                                                               |
| F(000)                            | 1008                                                                                                                 |
| Crystal size                      | 0.8 x 0.3 x 0.1 mm                                                                                                   |
| Theta range for data collection   | 1.72 to 28.24 deg.                                                                                                   |
| Index ranges                      | -16 ≤ h ≤ 16, -16 ≤ k ≤ 16, -24 ≤ l ≤ 24                                                                             |
| Reflections collected / unique    | 27573 / 6693 [R(int) = 0.0463]                                                                                       |
| Completeness to theta = 28.24     | 97.1%                                                                                                                |
| Refinement method                 | Full-matrix least-squares on F <sup>2</sup>                                                                          |
| Data / restraints / parameters    | 6693 / 0 / 317                                                                                                       |
| Goodness-of-fit on F <sup>2</sup> | 1.011                                                                                                                |
| Final R indices [I > 2σ(I)]       | R1 = 0.0495, wR2 = 0.1429                                                                                            |
| R indices (all data)              | R1 = 0.0857, wR2 = 0.1602                                                                                            |
| Largest diff. peak and hole       | 0.345 and -0.351 e.Å <sup>-3</sup>                                                                                   |

Table 2. Atomic coordinates ( × 10<sup>4</sup>), equivalent isotropic displacement parameters (Å<sup>2</sup> × 10<sup>3</sup>), and occupancies for **15a**.

---

|      | x       | y        | z       | U(eq) | Occ. |
|------|---------|----------|---------|-------|------|
| Si   | 1981(1) | 9034(1)  | 1936(1) | 28(1) | 1    |
| C(1) | 4273(1) | 9484(2)  | 2520(1) | 27(1) | 1    |
| C(2) | 4837(1) | 9026(2)  | 3284(1) | 29(1) | 1    |
| C(3) | 5507(2) | 9549(2)  | 3864(1) | 32(1) | 1    |
| C(4) | 5789(2) | 10709(2) | 3843(1) | 51(1) | 1    |
| C(5) | 6125(2) | 8964(2)  | 4574(1) | 39(1) | 1    |
| C(6) | 7405(2) | 8874(2)  | 4661(1) | 41(1) | 1    |

|       |         |          |         |       |   |
|-------|---------|----------|---------|-------|---|
| C(7)  | 7595(2) | 8443(2)  | 3953(1) | 36(1) | 1 |
| C(8)  | 8322(2) | 8777(2)  | 3605(1) | 34(1) | 1 |
| C(9)  | 9217(2) | 9617(2)  | 3909(1) | 51(1) | 1 |
| C(10) | 8271(2) | 8358(2)  | 2835(1) | 36(1) | 1 |
| C(11) | 7820(2) | 9206(2)  | 2225(1) | 34(1) | 1 |
| C(12) | 6722(2) | 8916(2)  | 1585(1) | 30(1) | 1 |
| C(13) | 6927(2) | 7924(2)  | 1158(1) | 43(1) | 1 |
| C(14) | 5792(1) | 8694(1)  | 1956(1) | 28(1) | 1 |
| O(15) | 5678(1) | 7814(1)  | 2196(1) | 38(1) | 1 |
| C(16) | 5067(1) | 9603(1)  | 2038(1) | 26(1) | 1 |
| C(17) | 5074(2) | 10496(2) | 1645(1) | 29(1) | 1 |
| C(18) | 5738(2) | 10602(2) | 1119(1) | 31(1) | 1 |
| O(19) | 5482(1) | 11522(1) | 706(1)  | 42(1) | 1 |
| C(20) | 6079(2) | 11684(2) | 164(1)  | 46(1) | 1 |
| C(21) | 6476(2) | 9859(2)  | 1069(1) | 33(1) | 1 |
| O(22) | 3350(1) | 8811(1)  | 2122(1) | 31(1) | 1 |
| C(23) | 1526(2) | 9052(2)  | 2816(1) | 40(1) | 1 |
| C(24) | 2007(2) | 10015(2) | 3324(1) | 61(1) | 1 |
| C(25) | 1805(2) | 8012(2)  | 3252(1) | 63(1) | 1 |
| C(26) | 1633(2) | 10364(2) | 1451(1) | 40(1) | 1 |
| C(27) | 416(2)  | 10749(2) | 1361(2) | 63(1) | 1 |
| C(28) | 1913(2) | 10440(2) | 703(1)  | 54(1) | 1 |
| C(29) | 1358(2) | 7828(2)  | 1365(1) | 34(1) | 1 |
| C(30) | 65(2)   | 7742(2)  | 1183(2) | 55(1) | 1 |
| C(31) | 1736(2) | 7668(2)  | 658(1)  | 51(1) | 1 |

---

U(eq) is defined as one third of the trace of the orthogonalized Uij tensor.

Table 3. Bond lengths [Å] and angles [deg] for **15a**.

---

|             |            |
|-------------|------------|
| Si-O(22)    | 1.6528(13) |
| Si-C(29)    | 1.885(2)   |
| Si-C(23)    | 1.888(2)   |
| Si-C(26)    | 1.892(2)   |
| C(1)-O(22)  | 1.442(2)   |
| C(1)-C(2)   | 1.507(2)   |
| C(1)-C(16)  | 1.523(2)   |
| C(2)-C(3)   | 1.329(3)   |
| C(3)-C(4)   | 1.504(3)   |
| C(3)-C(5)   | 1.514(2)   |
| C(5)-C(6)   | 1.549(3)   |
| C(6)-C(7)   | 1.511(3)   |
| C(7)-C(8)   | 1.325(3)   |
| C(8)-C(9)   | 1.516(3)   |
| C(8)-C(10)  | 1.517(3)   |
| C(10)-C(11) | 1.540(3)   |
| C(11)-C(12) | 1.569(2)   |



|                   |            |
|-------------------|------------|
| C(12)-C(21)       | 1.502(3)   |
| C(12)-C(14)       | 1.535(2)   |
| C(12)-C(13)       | 1.541(3)   |
| C(14)-O(15)       | 1.219(2)   |
| C(14)-C(16)       | 1.490(3)   |
| C(16)-C(17)       | 1.344(3)   |
| C(17)-C(18)       | 1.461(2)   |
| C(18)-C(21)       | 1.330(3)   |
| C(18)-O(19)       | 1.375(2)   |
| O(19)-C(20)       | 1.433(2)   |
| C(23)-C(25)       | 1.526(3)   |
| C(23)-C(24)       | 1.546(3)   |
| C(26)-C(28)       | 1.538(3)   |
| C(26)-C(27)       | 1.546(3)   |
| C(29)-C(31)       | 1.538(3)   |
| C(29)-C(30)       | 1.540(3)   |
|                   |            |
| O(22)-Si-C(29)    | 101.90(8)  |
| O(22)-Si-C(23)    | 111.66(8)  |
| C(29)-Si-C(23)    | 109.03(9)  |
| O(22)-Si-C(26)    | 109.01(8)  |
| C(29)-Si-C(26)    | 116.28(9)  |
| C(23)-Si-C(26)    | 108.85(10) |
| O(22)-C(1)-C(2)   | 109.96(14) |
| O(22)-C(1)-C(16)  | 107.66(14) |
| C(2)-C(1)-C(16)   | 113.46(14) |
| C(3)-C(2)-C(1)    | 125.94(18) |
| C(2)-C(3)-C(4)    | 123.62(18) |
| C(2)-C(3)-C(5)    | 120.47(18) |
| C(4)-C(3)-C(5)    | 115.67(17) |
| C(3)-C(5)-C(6)    | 111.51(15) |
| C(7)-C(6)-C(5)    | 110.56(16) |
| C(8)-C(7)-C(6)    | 128.2(2)   |
| C(7)-C(8)-C(9)    | 124.41(19) |
| C(7)-C(8)-C(10)   | 120.68(18) |
| C(9)-C(8)-C(10)   | 114.86(17) |
| C(8)-C(10)-C(11)  | 111.44(16) |
| C(10)-C(11)-C(12) | 116.62(16) |
| C(21)-C(12)-C(14) | 113.29(15) |
| C(21)-C(12)-C(13) | 109.96(16) |
| C(14)-C(12)-C(13) | 110.27(16) |
| C(21)-C(12)-C(11) | 105.83(15) |
| C(14)-C(12)-C(11) | 107.11(14) |
| C(13)-C(12)-C(11) | 110.24(15) |
| O(15)-C(14)-C(16) | 121.48(16) |
| O(15)-C(14)-C(12) | 120.96(16) |
| C(16)-C(14)-C(12) | 117.52(15) |
| C(17)-C(16)-C(14) | 119.01(16) |
| C(17)-C(16)-C(1)  | 120.98(16) |
| C(14)-C(16)-C(1)  | 119.87(15) |
| C(16)-C(17)-C(18) | 122.65(17) |
| C(21)-C(18)-O(19) | 127.05(17) |
| C(21)-C(18)-C(17) | 121.13(17) |
| O(19)-C(18)-C(17) | 111.82(16) |
| C(18)-O(19)-C(20) | 115.73(16) |
| C(18)-C(21)-C(12) | 121.69(17) |

|                   |            |
|-------------------|------------|
| C(1)-O(22)-Si     | 128.19(12) |
| C(25)-C(23)-C(24) | 111.1(2)   |
| C(25)-C(23)-Si    | 112.07(16) |
| C(24)-C(23)-Si    | 112.58(15) |
| C(28)-C(26)-C(27) | 110.78(19) |
| C(28)-C(26)-Si    | 114.26(15) |
| C(27)-C(26)-Si    | 114.01(16) |
| C(31)-C(29)-C(30) | 111.08(18) |
| C(31)-C(29)-Si    | 114.54(14) |
| C(30)-C(29)-Si    | 114.04(15) |

---

Symmetry transformations used to generate equivalent atoms:

Table 4. Anisotropic displacement parameters ( $\text{Å}^2 \times 10^3$ ) for **15a**.

---

|       | U11   | U22   | U33   | U23    | U13   | U12    |
|-------|-------|-------|-------|--------|-------|--------|
| Si    | 20(1) | 36(1) | 25(1) | -1(1)  | 4(1)  | -2(1)  |
| C(1)  | 20(1) | 31(1) | 28(1) | -1(1)  | 6(1)  | -2(1)  |
| C(2)  | 26(1) | 34(1) | 28(1) | 5(1)   | 10(1) | -1(1)  |
| C(3)  | 29(1) | 41(1) | 27(1) | 2(1)   | 10(1) | 3(1)   |
| C(4)  | 60(1) | 38(1) | 43(1) | -7(1)  | -2(1) | 0(1)   |
| C(5)  | 36(1) | 56(1) | 26(1) | 6(1)   | 9(1)  | 2(1)   |
| C(6)  | 35(1) | 58(1) | 26(1) | 10(1)  | 4(1)  | 2(1)   |
| C(7)  | 31(1) | 39(1) | 32(1) | 5(1)   | 3(1)  | 4(1)   |
| C(8)  | 25(1) | 41(1) | 32(1) | 2(1)   | 4(1)  | 5(1)   |
| C(9)  | 40(1) | 71(2) | 42(1) | -12(1) | 10(1) | -14(1) |
| C(10) | 28(1) | 40(1) | 39(1) | -3(1)  | 8(1)  | 5(1)   |
| C(11) | 27(1) | 42(1) | 33(1) | -4(1)  | 9(1)  | -4(1)  |
| C(12) | 27(1) | 35(1) | 28(1) | -7(1)  | 9(1)  | 1(1)   |
| C(13) | 40(1) | 47(1) | 42(1) | -15(1) | 12(1) | 6(1)   |
| C(14) | 25(1) | 28(1) | 27(1) | -6(1)  | 5(1)  | -4(1)  |
| O(15) | 38(1) | 27(1) | 50(1) | -2(1)  | 14(1) | -2(1)  |
| C(16) | 21(1) | 31(1) | 24(1) | -2(1)  | 4(1)  | -2(1)  |
| C(17) | 28(1) | 32(1) | 28(1) | 1(1)   | 9(1)  | 1(1)   |
| C(18) | 30(1) | 38(1) | 26(1) | 3(1)   | 8(1)  | -4(1)  |
| O(19) | 45(1) | 44(1) | 40(1) | 15(1)  | 20(1) | 4(1)   |
| C(20) | 49(1) | 55(1) | 38(1) | 13(1)  | 20(1) | -3(1)  |
| C(21) | 31(1) | 44(1) | 27(1) | -2(1)  | 13(1) | -2(1)  |
| O(22) | 21(1) | 36(1) | 34(1) | -1(1)  | 6(1)  | -5(1)  |
| C(23) | 26(1) | 61(1) | 35(1) | -5(1)  | 11(1) | -3(1)  |
| C(24) | 45(1) | 98(2) | 43(1) | -28(1) | 19(1) | -16(1) |
| C(25) | 55(1) | 99(2) | 44(1) | 22(1)  | 26(1) | 6(1)   |
| C(26) | 36(1) | 35(1) | 40(1) | -2(1)  | -2(1) | 0(1)   |
| C(27) | 47(1) | 49(2) | 77(2) | 1(1)   | -5(1) | 14(1)  |
| C(28) | 71(2) | 44(1) | 39(1) | 10(1)  | 1(1)  | -4(1)  |
| C(29) | 26(1) | 39(1) | 35(1) | -4(1)  | 6(1)  | -3(1)  |
| C(30) | 29(1) | 56(2) | 72(2) | -19(1) | 4(1)  | -9(1)  |

---

C(31) 64(2) 47(1) 46(1) -10(1) 20(1) -4(1)

---

The anisotropic displacement factor exponent takes the form:

$$-2 \pi^2 [ h^2 a^{*2} U_{11} + \dots + 2 h k a^* b^* U_{12} ]$$

Table 5. Hydrogen coordinates (  $\times 10^4$ ), isotropic displacement parameters ( $\text{\AA}^2 \times 10^3$ ), and occupancies for **15a**.

---

|        | x        | y         | z        | U(eq) | Occ. |
|--------|----------|-----------|----------|-------|------|
| H(1)   | 3971     | 10186     | 2583     | 32    | 1    |
| H(2)   | 4694(17) | 8256(19)  | 3306(11) | 43(6) | 1    |
| H(4A)  | 6276     | 10922     | 4323     | 76    | 1    |
| H(4B)  | 5106     | 11120     | 3725     | 76    | 1    |
| H(4C)  | 6164     | 10826     | 3468     | 76    | 1    |
| H(5A)  | 5808     | 8257      | 4563     | 47    | 1    |
| H(5B)  | 6019     | 9337      | 5002     | 47    | 1    |
| H(6A)  | 7754     | 9569      | 4770     | 49    | 1    |
| H(6B)  | 7758     | 8406      | 5077     | 49    | 1    |
| H(7)   | 7045(18) | 7888(18)  | 3693(12) | 43(6) | 1    |
| H(9A)  | 9640     | 9730      | 3560     | 77    | 1    |
| H(9B)  | 9717     | 9383      | 4379     | 77    | 1    |
| H(9C)  | 8861     | 10269     | 3980     | 77    | 1    |
| H(10A) | 7784     | 7739      | 2724     | 43    | 1    |
| H(10B) | 9021     | 8140      | 2831     | 43    | 1    |
| H(11A) | 8412     | 9367      | 1998     | 41    | 1    |
| H(11B) | 7674     | 9850      | 2467     | 41    | 1    |
| H(13A) | 7079     | 7324      | 1489     | 65    | 1    |
| H(13B) | 7562     | 8047      | 972      | 65    | 1    |
| H(13C) | 6268     | 7785      | 745      | 65    | 1    |
| H(17)  | 4594(18) | 11098(16) | 1651(11) | 40(6) | 1    |
| H(20A) | 5847     | 12344     | -91      | 69    | 1    |
| H(20B) | 5914     | 11111     | -191     | 69    | 1    |
| H(20C) | 6876     | 11704     | 412      | 69    | 1    |
| H(21)  | 6943(17) | 9916(17)  | 768(11)  | 38(5) | 1    |
| H(23)  | 721(17)  | 9097(15)  | 2662(11) | 34(5) | 1    |
| H(24A) | 1817     | 10659     | 3038     | 91    | 1    |
| H(24B) | 2813     | 9953      | 3513     | 91    | 1    |
| H(24C) | 1689     | 10033     | 3734     | 91    | 1    |
| H(25A) | 1492     | 7428      | 2927     | 95    | 1    |
| H(25B) | 1487     | 8022      | 3663     | 95    | 1    |
| H(25C) | 2609     | 7932      | 3440     | 95    | 1    |
| H(26)  | 2214(19) | 10865(17) | 1758(13) | 48(6) | 1    |
| H(27A) | 258      | 10695     | 1833     | 94    | 1    |

---

|        |          |          |          |       |   |
|--------|----------|----------|----------|-------|---|
| H(27B) | -108     | 10316    | 997      | 94    | 1 |
| H(27C) | 341      | 11476    | 1198     | 94    | 1 |
| H(28A) | 2671     | 10198    | 770      | 82    | 1 |
| H(28B) | 1844     | 11165    | 536      | 82    | 1 |
| H(28C) | 1397     | 10005    | 336      | 82    | 1 |
| H(29)  | 1717(18) | 7205(18) | 1709(12) | 45(6) | 1 |
| H(30A) | -148     | 7843     | 1632     | 82    | 1 |
| H(30B) | -176     | 7052     | 979      | 82    | 1 |
| H(30C) | -286     | 8278     | 824      | 82    | 1 |
| H(31A) | 2544     | 7718     | 787      | 77    | 1 |
| H(31B) | 1401     | 8205     | 297      | 77    | 1 |
| H(31C) | 1499     | 6979     | 450      | 77    | 1 |

---
